# Supplementary material for: Survival estimation of oral cancer using fuzzy deep learning
Source: Springer Nature journal article supplement (doi:10.1186/s12903-024-04279-6), 2024-05-02
Supplement: MOESM1 [file 27046996]

# FuzzyDeepLearningOralCancer\_FDL

April 17, 2024

```
[1]: # for reading data
import pandas as pd
import numpy as np
from sklearn.preprocessing import LabelEncoder
from keras.wrappers.scikit_learn import KerasClassifier
from keras.utils import np_utils

# for modeling
from keras.models import Sequential
from keras.layers import Dense, Dropout
from keras.callbacks import EarlyStopping
from tensorflow.keras import optimizers

[2]: train_ds = pd.read_csv('8.Training_oral_cancer.csv')
df_train_ds = train_ds.sample(frac=1).reset_index(drop=True)

validate_ds = pd.read_csv('4.validate_oral_cancer.csv')
df_validate_ds = validate_ds.sample(frac=1).reset_index(drop=True)

test_ds = pd.read_csv('5.test_oral_cancer.csv')
df_test_ds = test_ds.sample(frac=1).reset_index(drop=True)

[3]: ##### Training split into X and Y
Y_train = df_train_ds['target']
X_train = df_train_ds.drop(['target'], axis=1)
print("Training Set")
print(X_train.shape)
print(Y_train.shape)

# convert to numpy arrays
X_train = np.array(X_train)

##### Validate split into X and Y
Y_validate = df_validate_ds['target']
X_validate = df_validate_ds.drop(['target'], axis=1)
print("Validation Set")
```

```

print(X_validate.shape)
print(Y_validate.shape)

# convert to numpy arrays
X_validate = np.array(X_validate)

##### Test split into X and Y
Y_test = df_test_ds['target']
X_test = df_test_ds.drop(['target'], axis=1)
print("Test Set")
print(X_test.shape)
print(Y_test.shape)

# convert to numpy arrays
X_test = np.array(X_test)

```

```

Training Set
(1812, 13)
(1812,)
Validation Set
(58, 13)
(58,)
Test Set
(116, 13)
(116,)

```

```

[4]: ##### Show Y Training
print("##### Y Training")

Y_train.head()

## 0      setosa
## 1    virginica
## 2    versicolor
## 3    virginica
## 4      setosa

# work with labels
# encode class values as integers
encoder = LabelEncoder()
encoder.fit(Y_train)
encoded_Y_train = encoder.transform(Y_train)
# convert integers to dummy variables (i.e. one hot encoded)
dummy_y_train = np_utils.to_categorical(encoded_Y_train)

print(encoded_Y_train)

```

```

##### Show Y Validate
print("##### Y Validation")
Y_validate.head()
encoder = LabelEncoder()
encoder.fit(Y_validate)
encoded_Y_validate = encoder.transform(Y_validate)
dummy_y_validate = np_utils.to_categorical(encoded_Y_validate)
print(encoded_Y_validate)
print(dummy_y_validate)

##### Show Y Test
print("##### Y Validation")
Y_test.head()
encoder = LabelEncoder()
encoder.fit(Y_test)
encoded_Y_test = encoder.transform(Y_test)
dummy_y_test = np_utils.to_categorical(encoded_Y_test)
print(encoded_Y_test)
print(dummy_y_test)

##### Y Training
[3 5 5 ... 2 2 2]
[[0. 0. 0. 1. 0. 0.]
 [0. 0. 0. 0. 0. 1.]
 [0. 0. 0. 0. 0. 1.]
 ...
 [0. 0. 1. 0. 0. 0.]
 [0. 0. 1. 0. 0. 0.]
 [0. 0. 1. 0. 0. 0.]]

##### Y Validation
[1 5 3 5 5 0 5 5 5 5 1 0 2 4 2 5 5 0 0 5 0 0 0 0 5 5 1 5 0 5 5 5 0 5 5 1 5
 5 5 5 1 5 5 5 5 2 5 0 1 5 0 5 3 0 0 0 5 1]
[[0. 1. 0. 0. 0. 0.]
 [0. 0. 0. 0. 0. 1.]
 [0. 0. 0. 1. 0. 0.]
 [0. 0. 0. 0. 0. 1.]
 [0. 0. 0. 0. 0. 1.]
 [0. 0. 0. 0. 0. 1.]
 [1. 0. 0. 0. 0. 0.]
 [0. 0. 0. 0. 0. 1.]
 [0. 0. 0. 0. 0. 1.]
 [0. 0. 0. 0. 0. 1.]
 [0. 0. 0. 0. 0. 1.]
 [0. 1. 0. 0. 0. 0.]
 [1. 0. 0. 0. 0. 0.]
 [0. 0. 1. 0. 0. 0.]

```

[0. 0. 0. 0. 1. 0.]  
[0. 0. 1. 0. 0. 0.]  
[0. 0. 0. 0. 0. 1.]  
[0. 0. 0. 0. 0. 1.]  
[1. 0. 0. 0. 0. 0.]  
[1. 0. 0. 0. 0. 0.]  
[0. 0. 0. 0. 0. 1.]  
[1. 0. 0. 0. 0. 0.]  
[1. 0. 0. 0. 0. 0.]  
[1. 0. 0. 0. 0. 0.]  
[1. 0. 0. 0. 0. 0.]  
[0. 0. 0. 0. 0. 1.]  
[0. 0. 0. 0. 0. 1.]  
[0. 1. 0. 0. 0. 0.]  
[0. 0. 0. 0. 0. 1.]  
[1. 0. 0. 0. 0. 0.]  
[0. 0. 0. 0. 0. 1.]  
[0. 0. 0. 0. 0. 1.]  
[0. 0. 0. 0. 0. 1.]  
[1. 0. 0. 0. 0. 0.]  
[0. 0. 0. 0. 0. 1.]  
[0. 0. 0. 0. 0. 1.]  
[0. 1. 0. 0. 0. 0.]  
[0. 0. 0. 0. 0. 1.]  
[0. 0. 0. 0. 0. 1.]  
[0. 0. 0. 0. 0. 1.]  
[0. 0. 0. 0. 0. 1.]  
[0. 0. 0. 0. 0. 1.]  
[0. 0. 0. 0. 0. 1.]  
[0. 0. 1. 0. 0. 0.]  
[0. 0. 0. 0. 0. 1.]  
[1. 0. 0. 0. 0. 0.]  
[0. 1. 0. 0. 0. 0.]  
[0. 0. 0. 0. 0. 1.]  
[1. 0. 0. 0. 0. 0.]  
[0. 0. 0. 0. 0. 1.]  
[0. 0. 0. 1. 0. 0.]  
[1. 0. 0. 0. 0. 0.]  
[1. 0. 0. 0. 0. 0.]  
[1. 0. 0. 0. 0. 0.]  
[0. 0. 0. 0. 0. 1.]  
[0. 1. 0. 0. 0. 0.]

##### Y Validation

[3 4 5 1 3 5 1 5 1 1 1 5 2 5 0 5 5 5 5 5 5 5 0 1 1 5 0 5 0 5 5 0 5 0 5 0  
3 0 5 5 5 0 5 0 2 5 5 0 5 5 0 0 1 5 0 5 2 0 0 0 0 5 5 5 5 2 0 5 0 0 1 0 1

0 1 5 5 0 5 5 1 5 5 0 0 5 5 5 0 0 5 5 5 5 0 5 5 5 5 1 2 5 5 5 0 5 3 5 5 5  
5 2 5 2 0]

[0. 0. 0. 1. 0. 0.]  
[0. 0. 0. 0. 1. 0.]  
[0. 0. 0. 0. 0. 1.]  
[0. 1. 0. 0. 0. 0.]  
[0. 0. 0. 1. 0. 0.]  
[0. 0. 0. 0. 0. 1.]  
[0. 1. 0. 0. 0. 0.]  
[0. 0. 0. 0. 0. 1.]  
[0. 1. 0. 0. 0. 0.]  
[0. 1. 0. 0. 0. 0.]  
[0. 0. 0. 0. 0. 1.]  
[0. 0. 1. 0. 0. 0.]  
[0. 0. 0. 0. 0. 1.]  
[1. 0. 0. 0. 0. 0.]  
[0. 0. 0. 0. 0. 1.]  
[0. 0. 0. 0. 0. 1.]  
[0. 0. 0. 0. 0. 1.]  
[0. 0. 0. 0. 0. 1.]  
[0. 0. 0. 0. 0. 1.]  
[0. 0. 0. 0. 0. 1.]  
[0. 0. 0. 0. 0. 1.]  
[0. 0. 0. 0. 0. 1.]  
[1. 0. 0. 0. 0. 0.]  
[0. 1. 0. 0. 0. 0.]  
[0. 1. 0. 0. 0. 0.]  
[0. 0. 0. 0. 0. 1.]  
[1. 0. 0. 0. 0. 0.]  
[0. 0. 0. 0. 0. 1.]  
[1. 0. 0. 0. 0. 0.]  
[0. 0. 0. 0. 0. 1.]  
[1. 0. 0. 0. 0. 0.]  
[0. 0. 0. 0. 0. 1.]  
[1. 0. 0. 0. 0. 0.]  
[0. 0. 0. 1. 0. 0.]  
[1. 0. 0. 0. 0. 0.]  
[0. 0. 0. 0. 0. 1.]  
[0. 0. 0. 0. 0. 1.]  
[0. 0. 0. 0. 0. 1.]  
[1. 0. 0. 0. 0. 0.]  
[0. 0. 0. 0. 0. 1.]  
[1. 0. 0. 0. 0. 0.]  
[0. 0. 1. 0. 0. 0.]

[0. 0. 0. 0. 0. 1.]  
[0. 0. 0. 0. 0. 1.]  
[1. 0. 0. 0. 0. 0.]  
[0. 0. 0. 0. 0. 1.]  
[0. 0. 0. 0. 0. 1.]  
[1. 0. 0. 0. 0. 0.]  
[1. 0. 0. 0. 0. 0.]  
[0. 1. 0. 0. 0. 0.]  
[0. 0. 0. 0. 0. 1.]  
[1. 0. 0. 0. 0. 0.]  
[0. 0. 0. 0. 0. 1.]  
[0. 0. 1. 0. 0. 0.]  
[1. 0. 0. 0. 0. 0.]  
[1. 0. 0. 0. 0. 0.]  
[1. 0. 0. 0. 0. 0.]  
[0. 0. 0. 0. 0. 1.]  
[0. 0. 0. 0. 0. 1.]  
[0. 0. 0. 0. 0. 1.]  
[0. 0. 1. 0. 0. 0.]  
[1. 0. 0. 0. 0. 0.]  
[0. 0. 0. 0. 0. 1.]  
[1. 0. 0. 0. 0. 0.]  
[1. 0. 0. 0. 0. 0.]  
[0. 1. 0. 0. 0. 0.]  
[1. 0. 0. 0. 0. 0.]  
[0. 1. 0. 0. 0. 0.]  
[1. 0. 0. 0. 0. 0.]  
[0. 1. 0. 0. 0. 0.]  
[0. 0. 0. 0. 0. 1.]  
[0. 0. 0. 0. 0. 1.]  
[1. 0. 0. 0. 0. 0.]  
[1. 0. 0. 0. 0. 0.]  
[0. 0. 0. 0. 0. 1.]  
[0. 0. 0. 0. 0. 1.]  
[0. 1. 0. 0. 0. 0.]  
[0. 0. 0. 0. 0. 1.]  
[0. 0. 0. 0. 0. 1.]  
[1. 0. 0. 0. 0. 0.]  
[1. 0. 0. 0. 0. 0.]  
[0. 0. 0. 0. 0. 1.]  
[0. 0. 0. 0. 0. 1.]  
[0. 0. 0. 0. 0. 1.]

```

[0. 0. 0. 0. 0. 1.]
[1. 0. 0. 0. 0. 0.]
[0. 0. 0. 0. 0. 1.]
[0. 0. 0. 0. 0. 1.]
[0. 0. 0. 0. 0. 1.]
[0. 0. 0. 0. 0. 1.]
[0. 1. 0. 0. 0. 0.]
[0. 0. 1. 0. 0. 0.]
[0. 0. 0. 0. 0. 1.]
[0. 0. 0. 0. 0. 1.]
[0. 0. 0. 0. 0. 1.]
[1. 0. 0. 0. 0. 0.]
[0. 0. 0. 0. 0. 1.]
[0. 0. 0. 1. 0. 0.]
[0. 0. 0. 0. 0. 1.]
[0. 0. 0. 0. 0. 1.]
[0. 0. 0. 0. 0. 1.]
[0. 0. 0. 0. 0. 1.]
[0. 0. 1. 0. 0. 0.]
[0. 0. 0. 0. 0. 1.]
[0. 0. 1. 0. 0. 0.]
[1. 0. 0. 0. 0. 0.]

```

```

[5]: # build a model
model = Sequential()
model.add(Dense(84, input_shape=(X_train.shape[1],), activation='relu')) #
    ↳input shape is (features,)
model.add(Dense(48, activation='relu'))
model.add(Dense(24, activation='relu'))
model.add(Dense(12, activation='relu'))
model.add(Dense(6, activation='softmax'))

model.summary()

learning_rate = 0.0001
optimizer = optimizers.Adam(learning_rate)
# compile the model
model.compile(optimizer = optimizer,
              #optimizer='rmsprop',
              loss='categorical_crossentropy', # this is different instead of
    ↳binary_crossentropy (for regular classification)
              metrics=['accuracy'])

```

Model: "sequential"

| Layer (type)  | Output Shape | Param # |
|---------------|--------------|---------|
| dense (Dense) | (None, 84)   | 1176    |

```
dense_1 (Dense)          (None, 48)          4080
dense_2 (Dense)          (None, 24)          1176
dense_3 (Dense)          (None, 12)          300
dense_4 (Dense)          (None, 6)           78
```

```
=====
Total params: 6,810
Trainable params: 6,810
Non-trainable params: 0
-----
```

```
[44]: import keras
from keras.callbacks import EarlyStopping

es = keras.callbacks.EarlyStopping(monitor='val_loss',
                                   mode='min',
                                   patience=10,
                                   restore_best_weights=True) # important ->
    ↳ otherwise you just return the last weights...

# now we just update our model fit call
history = model.fit(X_train,
                    dummy_y_train,
                    #callbacks=[es],
                    epochs=1000, # you can set this to a big number!
                    batch_size=10,
                    shuffle=True,
                    validation_split=0.2,
                    verbose=1)
```

```
Epoch 1/1000
145/145 [=====] - 1s 7ms/step - loss: 0.0777 -
accuracy: 0.9724 - val_loss: 0.1842 - val_accuracy: 0.9421
Epoch 2/1000
145/145 [=====] - 1s 6ms/step - loss: 0.0774 -
accuracy: 0.9724 - val_loss: 0.1794 - val_accuracy: 0.9421
Epoch 3/1000
145/145 [=====] - 1s 6ms/step - loss: 0.0797 -
accuracy: 0.9710 - val_loss: 0.2045 - val_accuracy: 0.9339
Epoch 4/1000
145/145 [=====] - 1s 6ms/step - loss: 0.0784 -
accuracy: 0.9710 - val_loss: 0.1673 - val_accuracy: 0.9421
Epoch 5/1000
```



145/145 [=====] - 1s 6ms/step - loss: 0.0763 -  
accuracy: 0.9710 - val\_loss: 0.1836 - val\_accuracy: 0.9366  
Epoch 6/1000  
145/145 [=====] - 1s 7ms/step - loss: 0.0796 -  
accuracy: 0.9717 - val\_loss: 0.1877 - val\_accuracy: 0.9421  
Epoch 7/1000  
145/145 [=====] - 1s 6ms/step - loss: 0.0771 -  
accuracy: 0.9703 - val\_loss: 0.2098 - val\_accuracy: 0.9449  
Epoch 8/1000  
145/145 [=====] - 1s 6ms/step - loss: 0.0808 -  
accuracy: 0.9710 - val\_loss: 0.2481 - val\_accuracy: 0.9394  
Epoch 9/1000  
145/145 [=====] - 1s 6ms/step - loss: 0.0816 -  
accuracy: 0.9731 - val\_loss: 0.1740 - val\_accuracy: 0.9421  
Epoch 10/1000  
145/145 [=====] - 1s 6ms/step - loss: 0.0770 -  
accuracy: 0.9710 - val\_loss: 0.1691 - val\_accuracy: 0.9449  
Epoch 11/1000  
145/145 [=====] - 1s 6ms/step - loss: 0.0765 -  
accuracy: 0.9710 - val\_loss: 0.1726 - val\_accuracy: 0.9421  
Epoch 12/1000  
145/145 [=====] - 1s 6ms/step - loss: 0.0778 -  
accuracy: 0.9710 - val\_loss: 0.1865 - val\_accuracy: 0.9449  
Epoch 13/1000  
145/145 [=====] - 1s 7ms/step - loss: 0.0749 -  
accuracy: 0.9703 - val\_loss: 0.1754 - val\_accuracy: 0.9366  
Epoch 14/1000  
145/145 [=====] - 1s 8ms/step - loss: 0.0757 -  
accuracy: 0.9724 - val\_loss: 0.1797 - val\_accuracy: 0.9366  
Epoch 15/1000  
145/145 [=====] - 1s 6ms/step - loss: 0.0778 -  
accuracy: 0.9724 - val\_loss: 0.1984 - val\_accuracy: 0.9394  
Epoch 16/1000  
145/145 [=====] - 1s 7ms/step - loss: 0.0770 -  
accuracy: 0.9717 - val\_loss: 0.1734 - val\_accuracy: 0.9449  
Epoch 17/1000  
145/145 [=====] - 1s 7ms/step - loss: 0.0754 -  
accuracy: 0.9724 - val\_loss: 0.1726 - val\_accuracy: 0.9449  
Epoch 18/1000  
145/145 [=====] - 1s 6ms/step - loss: 0.0755 -  
accuracy: 0.9738 - val\_loss: 0.1873 - val\_accuracy: 0.9394  
Epoch 19/1000  
145/145 [=====] - 1s 7ms/step - loss: 0.0765 -  
accuracy: 0.9696 - val\_loss: 0.1683 - val\_accuracy: 0.9394  
Epoch 20/1000  
145/145 [=====] - 1s 5ms/step - loss: 0.0803 -  
accuracy: 0.9703 - val\_loss: 0.1649 - val\_accuracy: 0.9449  
Epoch 21/1000

145/145 [=====] - 1s 4ms/step - loss: 0.0790 -  
accuracy: 0.9689 - val\_loss: 0.1883 - val\_accuracy: 0.9394  
Epoch 22/1000  
145/145 [=====] - 0s 3ms/step - loss: 0.0764 -  
accuracy: 0.9703 - val\_loss: 0.1629 - val\_accuracy: 0.9366  
Epoch 23/1000  
145/145 [=====] - 0s 3ms/step - loss: 0.0744 -  
accuracy: 0.9683 - val\_loss: 0.1763 - val\_accuracy: 0.9366  
Epoch 24/1000  
145/145 [=====] - 1s 4ms/step - loss: 0.0766 -  
accuracy: 0.9710 - val\_loss: 0.2032 - val\_accuracy: 0.9339  
Epoch 25/1000  
145/145 [=====] - 1s 4ms/step - loss: 0.0810 -  
accuracy: 0.9696 - val\_loss: 0.1918 - val\_accuracy: 0.9366  
Epoch 26/1000  
145/145 [=====] - 0s 3ms/step - loss: 0.0794 -  
accuracy: 0.9696 - val\_loss: 0.1987 - val\_accuracy: 0.9421  
Epoch 27/1000  
145/145 [=====] - 0s 3ms/step - loss: 0.0757 -  
accuracy: 0.9703 - val\_loss: 0.1782 - val\_accuracy: 0.9366  
Epoch 28/1000  
145/145 [=====] - 0s 3ms/step - loss: 0.0782 -  
accuracy: 0.9717 - val\_loss: 0.1655 - val\_accuracy: 0.9421  
Epoch 29/1000  
145/145 [=====] - 0s 3ms/step - loss: 0.0785 -  
accuracy: 0.9738 - val\_loss: 0.1694 - val\_accuracy: 0.9421  
Epoch 30/1000  
145/145 [=====] - 1s 4ms/step - loss: 0.0770 -  
accuracy: 0.9717 - val\_loss: 0.1698 - val\_accuracy: 0.9366  
Epoch 31/1000  
145/145 [=====] - 0s 3ms/step - loss: 0.0795 -  
accuracy: 0.9683 - val\_loss: 0.2091 - val\_accuracy: 0.9449  
Epoch 32/1000  
145/145 [=====] - 1s 4ms/step - loss: 0.0746 -  
accuracy: 0.9731 - val\_loss: 0.2064 - val\_accuracy: 0.9394  
Epoch 33/1000  
145/145 [=====] - 1s 4ms/step - loss: 0.0802 -  
accuracy: 0.9689 - val\_loss: 0.1656 - val\_accuracy: 0.9449  
Epoch 34/1000  
145/145 [=====] - 1s 4ms/step - loss: 0.0787 -  
accuracy: 0.9738 - val\_loss: 0.1710 - val\_accuracy: 0.9421  
Epoch 35/1000  
145/145 [=====] - 0s 3ms/step - loss: 0.0758 -  
accuracy: 0.9731 - val\_loss: 0.1689 - val\_accuracy: 0.9366  
Epoch 36/1000  
145/145 [=====] - 1s 4ms/step - loss: 0.0762 -  
accuracy: 0.9724 - val\_loss: 0.1711 - val\_accuracy: 0.9366  
Epoch 37/1000

145/145 [=====] - 0s 3ms/step - loss: 0.0827 - accuracy: 0.9662 - val\_loss: 0.2174 - val\_accuracy: 0.9366  
Epoch 38/1000  
145/145 [=====] - 1s 4ms/step - loss: 0.0811 - accuracy: 0.9717 - val\_loss: 0.1896 - val\_accuracy: 0.9394  
Epoch 39/1000  
145/145 [=====] - 1s 4ms/step - loss: 0.0810 - accuracy: 0.9669 - val\_loss: 0.1910 - val\_accuracy: 0.9366  
Epoch 40/1000  
145/145 [=====] - 0s 3ms/step - loss: 0.0798 - accuracy: 0.9717 - val\_loss: 0.1926 - val\_accuracy: 0.9366  
Epoch 41/1000  
145/145 [=====] - 0s 3ms/step - loss: 0.0778 - accuracy: 0.9710 - val\_loss: 0.1664 - val\_accuracy: 0.9366  
Epoch 42/1000  
145/145 [=====] - 0s 3ms/step - loss: 0.0788 - accuracy: 0.9696 - val\_loss: 0.1781 - val\_accuracy: 0.9366  
Epoch 43/1000  
145/145 [=====] - 1s 4ms/step - loss: 0.0760 - accuracy: 0.9724 - val\_loss: 0.1828 - val\_accuracy: 0.9366  
Epoch 44/1000  
145/145 [=====] - 0s 3ms/step - loss: 0.0799 - accuracy: 0.9689 - val\_loss: 0.2019 - val\_accuracy: 0.9394  
Epoch 45/1000  
145/145 [=====] - 0s 3ms/step - loss: 0.0801 - accuracy: 0.9703 - val\_loss: 0.1937 - val\_accuracy: 0.9421  
Epoch 46/1000  
145/145 [=====] - 1s 4ms/step - loss: 0.0768 - accuracy: 0.9676 - val\_loss: 0.1880 - val\_accuracy: 0.9449  
Epoch 47/1000  
145/145 [=====] - 1s 4ms/step - loss: 0.0763 - accuracy: 0.9731 - val\_loss: 0.1832 - val\_accuracy: 0.9394  
Epoch 48/1000  
145/145 [=====] - 0s 3ms/step - loss: 0.0745 - accuracy: 0.9731 - val\_loss: 0.1702 - val\_accuracy: 0.9421  
Epoch 49/1000  
145/145 [=====] - 0s 3ms/step - loss: 0.0802 - accuracy: 0.9696 - val\_loss: 0.2026 - val\_accuracy: 0.9449  
Epoch 50/1000  
145/145 [=====] - 1s 4ms/step - loss: 0.0813 - accuracy: 0.9689 - val\_loss: 0.1989 - val\_accuracy: 0.9449  
Epoch 51/1000  
145/145 [=====] - 0s 3ms/step - loss: 0.0774 - accuracy: 0.9703 - val\_loss: 0.2082 - val\_accuracy: 0.9449  
Epoch 52/1000  
145/145 [=====] - 0s 3ms/step - loss: 0.0753 - accuracy: 0.9710 - val\_loss: 0.1990 - val\_accuracy: 0.9421  
Epoch 53/1000

145/145 [=====] - 0s 3ms/step - loss: 0.0777 -  
accuracy: 0.9738 - val\_loss: 0.2210 - val\_accuracy: 0.9394  
Epoch 54/1000  
145/145 [=====] - 0s 3ms/step - loss: 0.0777 -  
accuracy: 0.9696 - val\_loss: 0.1839 - val\_accuracy: 0.9366  
Epoch 55/1000  
145/145 [=====] - 0s 3ms/step - loss: 0.0777 -  
accuracy: 0.9724 - val\_loss: 0.1747 - val\_accuracy: 0.9421  
Epoch 56/1000  
145/145 [=====] - 0s 3ms/step - loss: 0.0777 -  
accuracy: 0.9738 - val\_loss: 0.2081 - val\_accuracy: 0.9449  
Epoch 57/1000  
145/145 [=====] - 1s 3ms/step - loss: 0.0766 -  
accuracy: 0.9724 - val\_loss: 0.1817 - val\_accuracy: 0.9421  
Epoch 58/1000  
145/145 [=====] - 1s 4ms/step - loss: 0.0782 -  
accuracy: 0.9696 - val\_loss: 0.1849 - val\_accuracy: 0.9449  
Epoch 59/1000  
145/145 [=====] - 1s 4ms/step - loss: 0.0774 -  
accuracy: 0.9689 - val\_loss: 0.1893 - val\_accuracy: 0.9394  
Epoch 60/1000  
145/145 [=====] - 1s 4ms/step - loss: 0.0756 -  
accuracy: 0.9731 - val\_loss: 0.2176 - val\_accuracy: 0.9449  
Epoch 61/1000  
145/145 [=====] - 1s 4ms/step - loss: 0.0818 -  
accuracy: 0.9669 - val\_loss: 0.1847 - val\_accuracy: 0.9311  
Epoch 62/1000  
145/145 [=====] - 0s 3ms/step - loss: 0.0792 -  
accuracy: 0.9696 - val\_loss: 0.1884 - val\_accuracy: 0.9394  
Epoch 63/1000  
145/145 [=====] - 0s 3ms/step - loss: 0.0802 -  
accuracy: 0.9717 - val\_loss: 0.1743 - val\_accuracy: 0.9366  
Epoch 64/1000  
145/145 [=====] - 1s 4ms/step - loss: 0.0755 -  
accuracy: 0.9703 - val\_loss: 0.1785 - val\_accuracy: 0.9366  
Epoch 65/1000  
145/145 [=====] - 0s 3ms/step - loss: 0.0748 -  
accuracy: 0.9724 - val\_loss: 0.2159 - val\_accuracy: 0.9394  
Epoch 66/1000  
145/145 [=====] - 1s 4ms/step - loss: 0.0758 -  
accuracy: 0.9710 - val\_loss: 0.1766 - val\_accuracy: 0.9366  
Epoch 67/1000  
145/145 [=====] - 0s 3ms/step - loss: 0.0795 -  
accuracy: 0.9710 - val\_loss: 0.2119 - val\_accuracy: 0.9339  
Epoch 68/1000  
145/145 [=====] - 0s 3ms/step - loss: 0.0792 -  
accuracy: 0.9717 - val\_loss: 0.1756 - val\_accuracy: 0.9421  
Epoch 69/1000

145/145 [=====] - 1s 4ms/step - loss: 0.0746 -  
accuracy: 0.9731 - val\_loss: 0.2089 - val\_accuracy: 0.9366  
Epoch 70/1000  
145/145 [=====] - 1s 4ms/step - loss: 0.0813 -  
accuracy: 0.9703 - val\_loss: 0.2046 - val\_accuracy: 0.9449  
Epoch 71/1000  
145/145 [=====] - 1s 4ms/step - loss: 0.0774 -  
accuracy: 0.9696 - val\_loss: 0.2160 - val\_accuracy: 0.9394  
Epoch 72/1000  
145/145 [=====] - 0s 3ms/step - loss: 0.0791 -  
accuracy: 0.9703 - val\_loss: 0.2129 - val\_accuracy: 0.9339  
Epoch 73/1000  
145/145 [=====] - 1s 4ms/step - loss: 0.0786 -  
accuracy: 0.9662 - val\_loss: 0.1834 - val\_accuracy: 0.9366  
Epoch 74/1000  
145/145 [=====] - 1s 4ms/step - loss: 0.0786 -  
accuracy: 0.9717 - val\_loss: 0.2064 - val\_accuracy: 0.9449  
Epoch 75/1000  
145/145 [=====] - 1s 4ms/step - loss: 0.0770 -  
accuracy: 0.9710 - val\_loss: 0.1944 - val\_accuracy: 0.9366  
Epoch 76/1000  
145/145 [=====] - 1s 4ms/step - loss: 0.0792 -  
accuracy: 0.9724 - val\_loss: 0.1893 - val\_accuracy: 0.9394  
Epoch 77/1000  
145/145 [=====] - 0s 3ms/step - loss: 0.0786 -  
accuracy: 0.9717 - val\_loss: 0.1755 - val\_accuracy: 0.9366  
Epoch 78/1000  
145/145 [=====] - 1s 4ms/step - loss: 0.0787 -  
accuracy: 0.9683 - val\_loss: 0.2107 - val\_accuracy: 0.9366  
Epoch 79/1000  
145/145 [=====] - 0s 3ms/step - loss: 0.0744 -  
accuracy: 0.9738 - val\_loss: 0.1721 - val\_accuracy: 0.9421  
Epoch 80/1000  
145/145 [=====] - 1s 4ms/step - loss: 0.0762 -  
accuracy: 0.9710 - val\_loss: 0.1717 - val\_accuracy: 0.9311  
Epoch 81/1000  
145/145 [=====] - 1s 4ms/step - loss: 0.0766 -  
accuracy: 0.9745 - val\_loss: 0.1808 - val\_accuracy: 0.9394  
Epoch 82/1000  
145/145 [=====] - 1s 3ms/step - loss: 0.0790 -  
accuracy: 0.9724 - val\_loss: 0.1782 - val\_accuracy: 0.9366  
Epoch 83/1000  
145/145 [=====] - 1s 4ms/step - loss: 0.0774 -  
accuracy: 0.9703 - val\_loss: 0.1749 - val\_accuracy: 0.9449  
Epoch 84/1000  
145/145 [=====] - 0s 3ms/step - loss: 0.0774 -  
accuracy: 0.9724 - val\_loss: 0.1779 - val\_accuracy: 0.9421  
Epoch 85/1000

145/145 [=====] - 1s 4ms/step - loss: 0.0772 -  
accuracy: 0.9703 - val\_loss: 0.1756 - val\_accuracy: 0.9421  
Epoch 86/1000  
145/145 [=====] - 0s 3ms/step - loss: 0.0773 -  
accuracy: 0.9696 - val\_loss: 0.1741 - val\_accuracy: 0.9421  
Epoch 87/1000  
145/145 [=====] - 0s 3ms/step - loss: 0.0781 -  
accuracy: 0.9683 - val\_loss: 0.1847 - val\_accuracy: 0.9366  
Epoch 88/1000  
145/145 [=====] - 0s 3ms/step - loss: 0.0769 -  
accuracy: 0.9717 - val\_loss: 0.1812 - val\_accuracy: 0.9366  
Epoch 89/1000  
145/145 [=====] - 1s 4ms/step - loss: 0.0744 -  
accuracy: 0.9738 - val\_loss: 0.1763 - val\_accuracy: 0.9366  
Epoch 90/1000  
145/145 [=====] - 0s 3ms/step - loss: 0.0771 -  
accuracy: 0.9731 - val\_loss: 0.1885 - val\_accuracy: 0.9394  
Epoch 91/1000  
145/145 [=====] - 0s 3ms/step - loss: 0.0758 -  
accuracy: 0.9717 - val\_loss: 0.1747 - val\_accuracy: 0.9366  
Epoch 92/1000  
145/145 [=====] - 1s 4ms/step - loss: 0.0754 -  
accuracy: 0.9731 - val\_loss: 0.2014 - val\_accuracy: 0.9449  
Epoch 93/1000  
145/145 [=====] - 0s 3ms/step - loss: 0.0786 -  
accuracy: 0.9710 - val\_loss: 0.2116 - val\_accuracy: 0.9449  
Epoch 94/1000  
145/145 [=====] - 1s 4ms/step - loss: 0.0733 -  
accuracy: 0.9724 - val\_loss: 0.1859 - val\_accuracy: 0.9366  
Epoch 95/1000  
145/145 [=====] - 0s 3ms/step - loss: 0.0827 -  
accuracy: 0.9703 - val\_loss: 0.1854 - val\_accuracy: 0.9394  
Epoch 96/1000  
145/145 [=====] - 1s 4ms/step - loss: 0.0765 -  
accuracy: 0.9731 - val\_loss: 0.1709 - val\_accuracy: 0.9421  
Epoch 97/1000  
145/145 [=====] - 1s 4ms/step - loss: 0.0793 -  
accuracy: 0.9703 - val\_loss: 0.1995 - val\_accuracy: 0.9449  
Epoch 98/1000  
145/145 [=====] - 0s 3ms/step - loss: 0.0769 -  
accuracy: 0.9703 - val\_loss: 0.1896 - val\_accuracy: 0.9394  
Epoch 99/1000  
145/145 [=====] - 0s 3ms/step - loss: 0.0782 -  
accuracy: 0.9696 - val\_loss: 0.1964 - val\_accuracy: 0.9449  
Epoch 100/1000  
145/145 [=====] - 1s 4ms/step - loss: 0.0771 -  
accuracy: 0.9683 - val\_loss: 0.1741 - val\_accuracy: 0.9366  
Epoch 101/1000

145/145 [=====] - 0s 3ms/step - loss: 0.0799 -  
accuracy: 0.9696 - val\_loss: 0.1895 - val\_accuracy: 0.9394  
Epoch 102/1000  
145/145 [=====] - 0s 3ms/step - loss: 0.0771 -  
accuracy: 0.9738 - val\_loss: 0.1798 - val\_accuracy: 0.9366  
Epoch 103/1000  
145/145 [=====] - 1s 3ms/step - loss: 0.0758 -  
accuracy: 0.9724 - val\_loss: 0.1716 - val\_accuracy: 0.9421  
Epoch 104/1000  
145/145 [=====] - 0s 3ms/step - loss: 0.0779 -  
accuracy: 0.9689 - val\_loss: 0.2011 - val\_accuracy: 0.9339  
Epoch 105/1000  
145/145 [=====] - 1s 4ms/step - loss: 0.0772 -  
accuracy: 0.9738 - val\_loss: 0.1771 - val\_accuracy: 0.9449  
Epoch 106/1000  
145/145 [=====] - 0s 3ms/step - loss: 0.0746 -  
accuracy: 0.9717 - val\_loss: 0.2056 - val\_accuracy: 0.9339  
Epoch 107/1000  
145/145 [=====] - 1s 3ms/step - loss: 0.0789 -  
accuracy: 0.9717 - val\_loss: 0.1708 - val\_accuracy: 0.9366  
Epoch 108/1000  
145/145 [=====] - 0s 3ms/step - loss: 0.0804 -  
accuracy: 0.9724 - val\_loss: 0.1980 - val\_accuracy: 0.9366  
Epoch 109/1000  
145/145 [=====] - 1s 4ms/step - loss: 0.0791 -  
accuracy: 0.9696 - val\_loss: 0.1878 - val\_accuracy: 0.9394  
Epoch 110/1000  
145/145 [=====] - 1s 4ms/step - loss: 0.0779 -  
accuracy: 0.9717 - val\_loss: 0.1929 - val\_accuracy: 0.9394  
Epoch 111/1000  
145/145 [=====] - 0s 3ms/step - loss: 0.0779 -  
accuracy: 0.9689 - val\_loss: 0.1766 - val\_accuracy: 0.9366  
Epoch 112/1000  
145/145 [=====] - 0s 3ms/step - loss: 0.0770 -  
accuracy: 0.9710 - val\_loss: 0.2366 - val\_accuracy: 0.9284  
Epoch 113/1000  
145/145 [=====] - 1s 4ms/step - loss: 0.0771 -  
accuracy: 0.9717 - val\_loss: 0.1750 - val\_accuracy: 0.9421  
Epoch 114/1000  
145/145 [=====] - 0s 3ms/step - loss: 0.0759 -  
accuracy: 0.9703 - val\_loss: 0.1767 - val\_accuracy: 0.9421  
Epoch 115/1000  
145/145 [=====] - 1s 4ms/step - loss: 0.0782 -  
accuracy: 0.9717 - val\_loss: 0.1704 - val\_accuracy: 0.9421  
Epoch 116/1000  
145/145 [=====] - 0s 3ms/step - loss: 0.0789 -  
accuracy: 0.9689 - val\_loss: 0.1865 - val\_accuracy: 0.9449  
Epoch 117/1000

145/145 [=====] - 0s 3ms/step - loss: 0.0764 - accuracy: 0.9717 - val\_loss: 0.1858 - val\_accuracy: 0.9366  
Epoch 118/1000  
145/145 [=====] - 1s 4ms/step - loss: 0.0824 - accuracy: 0.9689 - val\_loss: 0.1925 - val\_accuracy: 0.9311  
Epoch 119/1000  
145/145 [=====] - 0s 3ms/step - loss: 0.0802 - accuracy: 0.9696 - val\_loss: 0.1771 - val\_accuracy: 0.9394  
Epoch 120/1000  
145/145 [=====] - 1s 4ms/step - loss: 0.0778 - accuracy: 0.9689 - val\_loss: 0.1770 - val\_accuracy: 0.9421  
Epoch 121/1000  
145/145 [=====] - 0s 3ms/step - loss: 0.0765 - accuracy: 0.9724 - val\_loss: 0.1712 - val\_accuracy: 0.9449  
Epoch 122/1000  
145/145 [=====] - 0s 3ms/step - loss: 0.0755 - accuracy: 0.9710 - val\_loss: 0.1965 - val\_accuracy: 0.9394  
Epoch 123/1000  
145/145 [=====] - 0s 3ms/step - loss: 0.0755 - accuracy: 0.9717 - val\_loss: 0.1955 - val\_accuracy: 0.9394  
Epoch 124/1000  
145/145 [=====] - 1s 4ms/step - loss: 0.0740 - accuracy: 0.9745 - val\_loss: 0.1729 - val\_accuracy: 0.9421  
Epoch 125/1000  
145/145 [=====] - 0s 3ms/step - loss: 0.0756 - accuracy: 0.9717 - val\_loss: 0.1808 - val\_accuracy: 0.9421  
Epoch 126/1000  
145/145 [=====] - 0s 3ms/step - loss: 0.0766 - accuracy: 0.9710 - val\_loss: 0.1877 - val\_accuracy: 0.9366  
Epoch 127/1000  
145/145 [=====] - 0s 3ms/step - loss: 0.0759 - accuracy: 0.9703 - val\_loss: 0.1852 - val\_accuracy: 0.9394  
Epoch 128/1000  
145/145 [=====] - 0s 3ms/step - loss: 0.0751 - accuracy: 0.9710 - val\_loss: 0.1954 - val\_accuracy: 0.9394  
Epoch 129/1000  
145/145 [=====] - 1s 4ms/step - loss: 0.0779 - accuracy: 0.9731 - val\_loss: 0.1771 - val\_accuracy: 0.9421  
Epoch 130/1000  
145/145 [=====] - 0s 3ms/step - loss: 0.0764 - accuracy: 0.9703 - val\_loss: 0.1884 - val\_accuracy: 0.9449  
Epoch 131/1000  
145/145 [=====] - 1s 4ms/step - loss: 0.0757 - accuracy: 0.9696 - val\_loss: 0.1950 - val\_accuracy: 0.9394  
Epoch 132/1000  
145/145 [=====] - 0s 3ms/step - loss: 0.0768 - accuracy: 0.9717 - val\_loss: 0.1618 - val\_accuracy: 0.9421  
Epoch 133/1000



145/145 [=====] - 0s 3ms/step - loss: 0.0781 -  
accuracy: 0.9696 - val\_loss: 0.1737 - val\_accuracy: 0.9394  
Epoch 134/1000  
145/145 [=====] - 0s 3ms/step - loss: 0.0773 -  
accuracy: 0.9696 - val\_loss: 0.1980 - val\_accuracy: 0.9394  
Epoch 135/1000  
145/145 [=====] - 0s 3ms/step - loss: 0.0779 -  
accuracy: 0.9696 - val\_loss: 0.1812 - val\_accuracy: 0.9366  
Epoch 136/1000  
145/145 [=====] - 0s 3ms/step - loss: 0.0785 -  
accuracy: 0.9717 - val\_loss: 0.1690 - val\_accuracy: 0.9366  
Epoch 137/1000  
145/145 [=====] - 1s 4ms/step - loss: 0.0755 -  
accuracy: 0.9724 - val\_loss: 0.1843 - val\_accuracy: 0.9366  
Epoch 138/1000  
145/145 [=====] - 0s 3ms/step - loss: 0.0784 -  
accuracy: 0.9689 - val\_loss: 0.1718 - val\_accuracy: 0.9394  
Epoch 139/1000  
145/145 [=====] - 0s 3ms/step - loss: 0.0785 -  
accuracy: 0.9703 - val\_loss: 0.1920 - val\_accuracy: 0.9394  
Epoch 140/1000  
145/145 [=====] - 1s 4ms/step - loss: 0.0729 -  
accuracy: 0.9710 - val\_loss: 0.1711 - val\_accuracy: 0.9366  
Epoch 141/1000  
145/145 [=====] - 1s 4ms/step - loss: 0.0746 -  
accuracy: 0.9717 - val\_loss: 0.2040 - val\_accuracy: 0.9339  
Epoch 142/1000  
145/145 [=====] - 0s 3ms/step - loss: 0.0777 -  
accuracy: 0.9683 - val\_loss: 0.2105 - val\_accuracy: 0.9449  
Epoch 143/1000  
145/145 [=====] - 0s 3ms/step - loss: 0.0816 -  
accuracy: 0.9696 - val\_loss: 0.1923 - val\_accuracy: 0.9449  
Epoch 144/1000  
145/145 [=====] - 1s 4ms/step - loss: 0.0777 -  
accuracy: 0.9710 - val\_loss: 0.1721 - val\_accuracy: 0.9421  
Epoch 145/1000  
145/145 [=====] - 0s 3ms/step - loss: 0.0763 -  
accuracy: 0.9703 - val\_loss: 0.1839 - val\_accuracy: 0.9394  
Epoch 146/1000  
145/145 [=====] - 1s 4ms/step - loss: 0.0804 -  
accuracy: 0.9683 - val\_loss: 0.1992 - val\_accuracy: 0.9394  
Epoch 147/1000  
145/145 [=====] - 1s 4ms/step - loss: 0.0771 -  
accuracy: 0.9724 - val\_loss: 0.1904 - val\_accuracy: 0.9394  
Epoch 148/1000  
145/145 [=====] - 1s 3ms/step - loss: 0.0749 -  
accuracy: 0.9683 - val\_loss: 0.1624 - val\_accuracy: 0.9449  
Epoch 149/1000

145/145 [=====] - 1s 4ms/step - loss: 0.0780 -  
accuracy: 0.9669 - val\_loss: 0.1900 - val\_accuracy: 0.9449  
Epoch 150/1000  
145/145 [=====] - 1s 4ms/step - loss: 0.0774 -  
accuracy: 0.9717 - val\_loss: 0.1742 - val\_accuracy: 0.9449  
Epoch 151/1000  
145/145 [=====] - 1s 4ms/step - loss: 0.0784 -  
accuracy: 0.9710 - val\_loss: 0.1851 - val\_accuracy: 0.9449  
Epoch 152/1000  
145/145 [=====] - 1s 3ms/step - loss: 0.0761 -  
accuracy: 0.9717 - val\_loss: 0.1945 - val\_accuracy: 0.9449  
Epoch 153/1000  
145/145 [=====] - 0s 3ms/step - loss: 0.0786 -  
accuracy: 0.9703 - val\_loss: 0.1956 - val\_accuracy: 0.9394  
Epoch 154/1000  
145/145 [=====] - 0s 3ms/step - loss: 0.0772 -  
accuracy: 0.9676 - val\_loss: 0.2124 - val\_accuracy: 0.9394  
Epoch 155/1000  
145/145 [=====] - 0s 3ms/step - loss: 0.0755 -  
accuracy: 0.9717 - val\_loss: 0.1823 - val\_accuracy: 0.9366  
Epoch 156/1000  
145/145 [=====] - 0s 3ms/step - loss: 0.0776 -  
accuracy: 0.9731 - val\_loss: 0.1775 - val\_accuracy: 0.9421  
Epoch 157/1000  
145/145 [=====] - 1s 4ms/step - loss: 0.0764 -  
accuracy: 0.9703 - val\_loss: 0.1835 - val\_accuracy: 0.9394  
Epoch 158/1000  
145/145 [=====] - 0s 3ms/step - loss: 0.0771 -  
accuracy: 0.9717 - val\_loss: 0.1954 - val\_accuracy: 0.9394  
Epoch 159/1000  
145/145 [=====] - 1s 4ms/step - loss: 0.0775 -  
accuracy: 0.9703 - val\_loss: 0.1826 - val\_accuracy: 0.9366  
Epoch 160/1000  
145/145 [=====] - 0s 3ms/step - loss: 0.0801 -  
accuracy: 0.9724 - val\_loss: 0.2073 - val\_accuracy: 0.9449  
Epoch 161/1000  
145/145 [=====] - 1s 4ms/step - loss: 0.0774 -  
accuracy: 0.9710 - val\_loss: 0.1741 - val\_accuracy: 0.9449  
Epoch 162/1000  
145/145 [=====] - 0s 3ms/step - loss: 0.0744 -  
accuracy: 0.9703 - val\_loss: 0.1847 - val\_accuracy: 0.9394  
Epoch 163/1000  
145/145 [=====] - 1s 4ms/step - loss: 0.0791 -  
accuracy: 0.9724 - val\_loss: 0.2035 - val\_accuracy: 0.9394  
Epoch 164/1000  
145/145 [=====] - 0s 3ms/step - loss: 0.0789 -  
accuracy: 0.9689 - val\_loss: 0.1886 - val\_accuracy: 0.9366  
Epoch 165/1000

145/145 [=====] - 1s 4ms/step - loss: 0.0771 -  
accuracy: 0.9731 - val\_loss: 0.1748 - val\_accuracy: 0.9449  
Epoch 166/1000  
145/145 [=====] - 0s 3ms/step - loss: 0.0764 -  
accuracy: 0.9717 - val\_loss: 0.1757 - val\_accuracy: 0.9339  
Epoch 167/1000  
145/145 [=====] - 0s 3ms/step - loss: 0.0776 -  
accuracy: 0.9710 - val\_loss: 0.2090 - val\_accuracy: 0.9449  
Epoch 168/1000  
145/145 [=====] - 1s 4ms/step - loss: 0.0775 -  
accuracy: 0.9724 - val\_loss: 0.1911 - val\_accuracy: 0.9449  
Epoch 169/1000  
145/145 [=====] - 0s 3ms/step - loss: 0.0781 -  
accuracy: 0.9710 - val\_loss: 0.1961 - val\_accuracy: 0.9366  
Epoch 170/1000  
145/145 [=====] - 1s 4ms/step - loss: 0.0770 -  
accuracy: 0.9710 - val\_loss: 0.1927 - val\_accuracy: 0.9449  
Epoch 171/1000  
145/145 [=====] - 0s 3ms/step - loss: 0.0764 -  
accuracy: 0.9717 - val\_loss: 0.1887 - val\_accuracy: 0.9449  
Epoch 172/1000  
145/145 [=====] - 1s 3ms/step - loss: 0.0746 -  
accuracy: 0.9710 - val\_loss: 0.1690 - val\_accuracy: 0.9449  
Epoch 173/1000  
145/145 [=====] - 0s 3ms/step - loss: 0.0770 -  
accuracy: 0.9717 - val\_loss: 0.2048 - val\_accuracy: 0.9394  
Epoch 174/1000  
145/145 [=====] - 1s 4ms/step - loss: 0.0756 -  
accuracy: 0.9683 - val\_loss: 0.1889 - val\_accuracy: 0.9421  
Epoch 175/1000  
145/145 [=====] - 1s 4ms/step - loss: 0.0760 -  
accuracy: 0.9717 - val\_loss: 0.1997 - val\_accuracy: 0.9421  
Epoch 176/1000  
145/145 [=====] - 1s 6ms/step - loss: 0.0768 -  
accuracy: 0.9710 - val\_loss: 0.1786 - val\_accuracy: 0.9421  
Epoch 177/1000  
145/145 [=====] - 1s 7ms/step - loss: 0.0771 -  
accuracy: 0.9703 - val\_loss: 0.1862 - val\_accuracy: 0.9449  
Epoch 178/1000  
145/145 [=====] - 1s 4ms/step - loss: 0.0768 -  
accuracy: 0.9710 - val\_loss: 0.1810 - val\_accuracy: 0.9339  
Epoch 179/1000  
145/145 [=====] - 1s 7ms/step - loss: 0.0781 -  
accuracy: 0.9703 - val\_loss: 0.1825 - val\_accuracy: 0.9449  
Epoch 180/1000  
145/145 [=====] - 0s 3ms/step - loss: 0.0745 -  
accuracy: 0.9731 - val\_loss: 0.1793 - val\_accuracy: 0.9449  
Epoch 181/1000

145/145 [=====] - 1s 4ms/step - loss: 0.0734 -  
accuracy: 0.9689 - val\_loss: 0.2010 - val\_accuracy: 0.9449  
Epoch 182/1000  
145/145 [=====] - 1s 4ms/step - loss: 0.0793 -  
accuracy: 0.9696 - val\_loss: 0.1846 - val\_accuracy: 0.9449  
Epoch 183/1000  
145/145 [=====] - 0s 3ms/step - loss: 0.0739 -  
accuracy: 0.9703 - val\_loss: 0.1914 - val\_accuracy: 0.9449  
Epoch 184/1000  
145/145 [=====] - 1s 4ms/step - loss: 0.0814 -  
accuracy: 0.9696 - val\_loss: 0.1796 - val\_accuracy: 0.9366  
Epoch 185/1000  
145/145 [=====] - 1s 4ms/step - loss: 0.0780 -  
accuracy: 0.9676 - val\_loss: 0.1827 - val\_accuracy: 0.9311  
Epoch 186/1000  
145/145 [=====] - 1s 4ms/step - loss: 0.0781 -  
accuracy: 0.9710 - val\_loss: 0.1858 - val\_accuracy: 0.9449  
Epoch 187/1000  
145/145 [=====] - 1s 3ms/step - loss: 0.0759 -  
accuracy: 0.9710 - val\_loss: 0.1847 - val\_accuracy: 0.9449  
Epoch 188/1000  
145/145 [=====] - 1s 4ms/step - loss: 0.0746 -  
accuracy: 0.9710 - val\_loss: 0.2007 - val\_accuracy: 0.9394  
Epoch 189/1000  
145/145 [=====] - 1s 4ms/step - loss: 0.0827 -  
accuracy: 0.9689 - val\_loss: 0.1940 - val\_accuracy: 0.9449  
Epoch 190/1000  
145/145 [=====] - 1s 4ms/step - loss: 0.0768 -  
accuracy: 0.9703 - val\_loss: 0.1813 - val\_accuracy: 0.9449  
Epoch 191/1000  
145/145 [=====] - 1s 4ms/step - loss: 0.0756 -  
accuracy: 0.9724 - val\_loss: 0.1731 - val\_accuracy: 0.9449  
Epoch 192/1000  
145/145 [=====] - 1s 4ms/step - loss: 0.0754 -  
accuracy: 0.9731 - val\_loss: 0.1728 - val\_accuracy: 0.9449  
Epoch 193/1000  
145/145 [=====] - 0s 3ms/step - loss: 0.0756 -  
accuracy: 0.9731 - val\_loss: 0.1910 - val\_accuracy: 0.9366  
Epoch 194/1000  
145/145 [=====] - 1s 3ms/step - loss: 0.0748 -  
accuracy: 0.9731 - val\_loss: 0.1770 - val\_accuracy: 0.9366  
Epoch 195/1000  
145/145 [=====] - 0s 3ms/step - loss: 0.0767 -  
accuracy: 0.9710 - val\_loss: 0.1756 - val\_accuracy: 0.9394  
Epoch 196/1000  
145/145 [=====] - 1s 4ms/step - loss: 0.0780 -  
accuracy: 0.9689 - val\_loss: 0.1991 - val\_accuracy: 0.9449  
Epoch 197/1000

145/145 [=====] - 1s 4ms/step - loss: 0.0774 -  
accuracy: 0.9724 - val\_loss: 0.1791 - val\_accuracy: 0.9449  
Epoch 198/1000  
145/145 [=====] - 1s 4ms/step - loss: 0.0768 -  
accuracy: 0.9738 - val\_loss: 0.1792 - val\_accuracy: 0.9449  
Epoch 199/1000  
145/145 [=====] - 1s 4ms/step - loss: 0.0757 -  
accuracy: 0.9717 - val\_loss: 0.1668 - val\_accuracy: 0.9449  
Epoch 200/1000  
145/145 [=====] - 1s 3ms/step - loss: 0.0772 -  
accuracy: 0.9710 - val\_loss: 0.1915 - val\_accuracy: 0.9449  
Epoch 201/1000  
145/145 [=====] - 1s 4ms/step - loss: 0.0747 -  
accuracy: 0.9710 - val\_loss: 0.1845 - val\_accuracy: 0.9366  
Epoch 202/1000  
145/145 [=====] - 1s 4ms/step - loss: 0.0763 -  
accuracy: 0.9717 - val\_loss: 0.1660 - val\_accuracy: 0.9449  
Epoch 203/1000  
145/145 [=====] - 1s 4ms/step - loss: 0.0753 -  
accuracy: 0.9689 - val\_loss: 0.1825 - val\_accuracy: 0.9394  
Epoch 204/1000  
145/145 [=====] - 0s 3ms/step - loss: 0.0759 -  
accuracy: 0.9745 - val\_loss: 0.1707 - val\_accuracy: 0.9366  
Epoch 205/1000  
145/145 [=====] - 0s 3ms/step - loss: 0.0744 -  
accuracy: 0.9731 - val\_loss: 0.2151 - val\_accuracy: 0.9394  
Epoch 206/1000  
145/145 [=====] - 0s 3ms/step - loss: 0.0769 -  
accuracy: 0.9710 - val\_loss: 0.1630 - val\_accuracy: 0.9421  
Epoch 207/1000  
145/145 [=====] - 1s 3ms/step - loss: 0.0743 -  
accuracy: 0.9717 - val\_loss: 0.1791 - val\_accuracy: 0.9421  
Epoch 208/1000  
145/145 [=====] - 0s 3ms/step - loss: 0.0801 -  
accuracy: 0.9696 - val\_loss: 0.1694 - val\_accuracy: 0.9421  
Epoch 209/1000  
145/145 [=====] - 1s 4ms/step - loss: 0.0773 -  
accuracy: 0.9724 - val\_loss: 0.1600 - val\_accuracy: 0.9366  
Epoch 210/1000  
145/145 [=====] - 0s 3ms/step - loss: 0.0784 -  
accuracy: 0.9689 - val\_loss: 0.1824 - val\_accuracy: 0.9366  
Epoch 211/1000  
145/145 [=====] - 1s 3ms/step - loss: 0.0782 -  
accuracy: 0.9717 - val\_loss: 0.1937 - val\_accuracy: 0.9394  
Epoch 212/1000  
145/145 [=====] - 0s 3ms/step - loss: 0.0743 -  
accuracy: 0.9731 - val\_loss: 0.1819 - val\_accuracy: 0.9366  
Epoch 213/1000

145/145 [=====] - 1s 3ms/step - loss: 0.0771 -  
accuracy: 0.9710 - val\_loss: 0.1776 - val\_accuracy: 0.9366  
Epoch 214/1000  
145/145 [=====] - 0s 3ms/step - loss: 0.0767 -  
accuracy: 0.9738 - val\_loss: 0.1715 - val\_accuracy: 0.9449  
Epoch 215/1000  
145/145 [=====] - 1s 4ms/step - loss: 0.0753 -  
accuracy: 0.9710 - val\_loss: 0.1698 - val\_accuracy: 0.9366  
Epoch 216/1000  
145/145 [=====] - 0s 3ms/step - loss: 0.0769 -  
accuracy: 0.9703 - val\_loss: 0.1733 - val\_accuracy: 0.9449  
Epoch 217/1000  
145/145 [=====] - 0s 3ms/step - loss: 0.0764 -  
accuracy: 0.9696 - val\_loss: 0.1813 - val\_accuracy: 0.9366  
Epoch 218/1000  
145/145 [=====] - 0s 3ms/step - loss: 0.0772 -  
accuracy: 0.9703 - val\_loss: 0.1853 - val\_accuracy: 0.9394  
Epoch 219/1000  
145/145 [=====] - 1s 4ms/step - loss: 0.0804 -  
accuracy: 0.9683 - val\_loss: 0.1710 - val\_accuracy: 0.9366  
Epoch 220/1000  
145/145 [=====] - 0s 3ms/step - loss: 0.0767 -  
accuracy: 0.9710 - val\_loss: 0.1825 - val\_accuracy: 0.9366  
Epoch 221/1000  
145/145 [=====] - 1s 4ms/step - loss: 0.0768 -  
accuracy: 0.9731 - val\_loss: 0.1924 - val\_accuracy: 0.9394  
Epoch 222/1000  
145/145 [=====] - 1s 4ms/step - loss: 0.0760 -  
accuracy: 0.9724 - val\_loss: 0.1903 - val\_accuracy: 0.9394  
Epoch 223/1000  
145/145 [=====] - 1s 4ms/step - loss: 0.0748 -  
accuracy: 0.9696 - val\_loss: 0.1702 - val\_accuracy: 0.9366  
Epoch 224/1000  
145/145 [=====] - 1s 4ms/step - loss: 0.0793 -  
accuracy: 0.9703 - val\_loss: 0.1975 - val\_accuracy: 0.9449  
Epoch 225/1000  
145/145 [=====] - 1s 4ms/step - loss: 0.0765 -  
accuracy: 0.9724 - val\_loss: 0.1836 - val\_accuracy: 0.9394  
Epoch 226/1000  
145/145 [=====] - 1s 4ms/step - loss: 0.0745 -  
accuracy: 0.9717 - val\_loss: 0.1866 - val\_accuracy: 0.9449  
Epoch 227/1000  
145/145 [=====] - 0s 3ms/step - loss: 0.0736 -  
accuracy: 0.9731 - val\_loss: 0.1783 - val\_accuracy: 0.9449  
Epoch 228/1000  
145/145 [=====] - 1s 3ms/step - loss: 0.0752 -  
accuracy: 0.9724 - val\_loss: 0.1949 - val\_accuracy: 0.9449  
Epoch 229/1000

145/145 [=====] - 1s 4ms/step - loss: 0.0772 -  
accuracy: 0.9710 - val\_loss: 0.1893 - val\_accuracy: 0.9449  
Epoch 230/1000  
145/145 [=====] - 1s 4ms/step - loss: 0.0772 -  
accuracy: 0.9724 - val\_loss: 0.1929 - val\_accuracy: 0.9394  
Epoch 231/1000  
145/145 [=====] - 0s 3ms/step - loss: 0.0774 -  
accuracy: 0.9731 - val\_loss: 0.1925 - val\_accuracy: 0.9311  
Epoch 232/1000  
145/145 [=====] - 1s 4ms/step - loss: 0.0754 -  
accuracy: 0.9717 - val\_loss: 0.1746 - val\_accuracy: 0.9421  
Epoch 233/1000  
145/145 [=====] - 1s 4ms/step - loss: 0.0761 -  
accuracy: 0.9696 - val\_loss: 0.1824 - val\_accuracy: 0.9449  
Epoch 234/1000  
145/145 [=====] - 0s 3ms/step - loss: 0.0736 -  
accuracy: 0.9717 - val\_loss: 0.1672 - val\_accuracy: 0.9421  
Epoch 235/1000  
145/145 [=====] - 1s 4ms/step - loss: 0.0783 -  
accuracy: 0.9703 - val\_loss: 0.1749 - val\_accuracy: 0.9421  
Epoch 236/1000  
145/145 [=====] - 1s 4ms/step - loss: 0.0789 -  
accuracy: 0.9717 - val\_loss: 0.1982 - val\_accuracy: 0.9449  
Epoch 237/1000  
145/145 [=====] - 0s 3ms/step - loss: 0.0775 -  
accuracy: 0.9703 - val\_loss: 0.1824 - val\_accuracy: 0.9394  
Epoch 238/1000  
145/145 [=====] - 1s 3ms/step - loss: 0.0764 -  
accuracy: 0.9696 - val\_loss: 0.1965 - val\_accuracy: 0.9394  
Epoch 239/1000  
145/145 [=====] - 1s 3ms/step - loss: 0.0736 -  
accuracy: 0.9717 - val\_loss: 0.2064 - val\_accuracy: 0.9449  
Epoch 240/1000  
145/145 [=====] - 1s 3ms/step - loss: 0.0757 -  
accuracy: 0.9683 - val\_loss: 0.1970 - val\_accuracy: 0.9449  
Epoch 241/1000  
145/145 [=====] - 0s 3ms/step - loss: 0.0742 -  
accuracy: 0.9745 - val\_loss: 0.1756 - val\_accuracy: 0.9339  
Epoch 242/1000  
145/145 [=====] - 1s 4ms/step - loss: 0.0777 -  
accuracy: 0.9724 - val\_loss: 0.1957 - val\_accuracy: 0.9394  
Epoch 243/1000  
145/145 [=====] - 1s 4ms/step - loss: 0.0764 -  
accuracy: 0.9703 - val\_loss: 0.1875 - val\_accuracy: 0.9449  
Epoch 244/1000  
145/145 [=====] - 1s 3ms/step - loss: 0.0758 -  
accuracy: 0.9710 - val\_loss: 0.1791 - val\_accuracy: 0.9449  
Epoch 245/1000

145/145 [=====] - 0s 3ms/step - loss: 0.0765 -  
accuracy: 0.9710 - val\_loss: 0.2111 - val\_accuracy: 0.9394  
Epoch 246/1000  
145/145 [=====] - 0s 3ms/step - loss: 0.0768 -  
accuracy: 0.9724 - val\_loss: 0.1969 - val\_accuracy: 0.9339  
Epoch 247/1000  
145/145 [=====] - 1s 4ms/step - loss: 0.0772 -  
accuracy: 0.9696 - val\_loss: 0.2118 - val\_accuracy: 0.9449  
Epoch 248/1000  
145/145 [=====] - 1s 3ms/step - loss: 0.0762 -  
accuracy: 0.9717 - val\_loss: 0.1826 - val\_accuracy: 0.9366  
Epoch 249/1000  
145/145 [=====] - 1s 4ms/step - loss: 0.0759 -  
accuracy: 0.9717 - val\_loss: 0.2015 - val\_accuracy: 0.9339  
Epoch 250/1000  
145/145 [=====] - 0s 3ms/step - loss: 0.0770 -  
accuracy: 0.9710 - val\_loss: 0.1838 - val\_accuracy: 0.9421  
Epoch 251/1000  
145/145 [=====] - 0s 3ms/step - loss: 0.0756 -  
accuracy: 0.9717 - val\_loss: 0.1951 - val\_accuracy: 0.9449  
Epoch 252/1000  
145/145 [=====] - 1s 4ms/step - loss: 0.0778 -  
accuracy: 0.9731 - val\_loss: 0.1862 - val\_accuracy: 0.9366  
Epoch 253/1000  
145/145 [=====] - 1s 4ms/step - loss: 0.0751 -  
accuracy: 0.9717 - val\_loss: 0.1898 - val\_accuracy: 0.9449  
Epoch 254/1000  
145/145 [=====] - 1s 4ms/step - loss: 0.0772 -  
accuracy: 0.9689 - val\_loss: 0.2006 - val\_accuracy: 0.9449  
Epoch 255/1000  
145/145 [=====] - 1s 4ms/step - loss: 0.0760 -  
accuracy: 0.9710 - val\_loss: 0.1915 - val\_accuracy: 0.9449  
Epoch 256/1000  
145/145 [=====] - 0s 3ms/step - loss: 0.0793 -  
accuracy: 0.9689 - val\_loss: 0.1974 - val\_accuracy: 0.9449  
Epoch 257/1000  
145/145 [=====] - 1s 4ms/step - loss: 0.0772 -  
accuracy: 0.9731 - val\_loss: 0.1878 - val\_accuracy: 0.9394  
Epoch 258/1000  
145/145 [=====] - 1s 4ms/step - loss: 0.0751 -  
accuracy: 0.9710 - val\_loss: 0.2007 - val\_accuracy: 0.9449  
Epoch 259/1000  
145/145 [=====] - 1s 4ms/step - loss: 0.0760 -  
accuracy: 0.9710 - val\_loss: 0.1985 - val\_accuracy: 0.9394  
Epoch 260/1000  
145/145 [=====] - 1s 4ms/step - loss: 0.0770 -  
accuracy: 0.9683 - val\_loss: 0.1920 - val\_accuracy: 0.9366  
Epoch 261/1000



145/145 [=====] - 1s 4ms/step - loss: 0.0759 -  
accuracy: 0.9731 - val\_loss: 0.1714 - val\_accuracy: 0.9366  
Epoch 262/1000  
145/145 [=====] - 1s 4ms/step - loss: 0.0742 -  
accuracy: 0.9717 - val\_loss: 0.1851 - val\_accuracy: 0.9366  
Epoch 263/1000  
145/145 [=====] - 1s 4ms/step - loss: 0.0735 -  
accuracy: 0.9752 - val\_loss: 0.1706 - val\_accuracy: 0.9394  
Epoch 264/1000  
145/145 [=====] - 1s 4ms/step - loss: 0.0742 -  
accuracy: 0.9710 - val\_loss: 0.2223 - val\_accuracy: 0.9449  
Epoch 265/1000  
145/145 [=====] - 1s 4ms/step - loss: 0.0752 -  
accuracy: 0.9710 - val\_loss: 0.1913 - val\_accuracy: 0.9449  
Epoch 266/1000  
145/145 [=====] - 1s 4ms/step - loss: 0.0772 -  
accuracy: 0.9731 - val\_loss: 0.1753 - val\_accuracy: 0.9449  
Epoch 267/1000  
145/145 [=====] - 0s 3ms/step - loss: 0.0780 -  
accuracy: 0.9683 - val\_loss: 0.1828 - val\_accuracy: 0.9449  
Epoch 268/1000  
145/145 [=====] - 1s 4ms/step - loss: 0.0754 -  
accuracy: 0.9689 - val\_loss: 0.1774 - val\_accuracy: 0.9449  
Epoch 269/1000  
145/145 [=====] - 1s 4ms/step - loss: 0.0781 -  
accuracy: 0.9689 - val\_loss: 0.1842 - val\_accuracy: 0.9449  
Epoch 270/1000  
145/145 [=====] - 1s 4ms/step - loss: 0.0749 -  
accuracy: 0.9724 - val\_loss: 0.1743 - val\_accuracy: 0.9421  
Epoch 271/1000  
145/145 [=====] - 1s 4ms/step - loss: 0.0752 -  
accuracy: 0.9703 - val\_loss: 0.2236 - val\_accuracy: 0.9449  
Epoch 272/1000  
145/145 [=====] - 1s 3ms/step - loss: 0.0797 -  
accuracy: 0.9710 - val\_loss: 0.1810 - val\_accuracy: 0.9421  
Epoch 273/1000  
145/145 [=====] - 1s 4ms/step - loss: 0.0746 -  
accuracy: 0.9710 - val\_loss: 0.2158 - val\_accuracy: 0.9449  
Epoch 274/1000  
145/145 [=====] - 1s 4ms/step - loss: 0.0746 -  
accuracy: 0.9731 - val\_loss: 0.2191 - val\_accuracy: 0.9339  
Epoch 275/1000  
145/145 [=====] - 1s 4ms/step - loss: 0.0774 -  
accuracy: 0.9696 - val\_loss: 0.2132 - val\_accuracy: 0.9394  
Epoch 276/1000  
145/145 [=====] - 1s 4ms/step - loss: 0.0760 -  
accuracy: 0.9717 - val\_loss: 0.1986 - val\_accuracy: 0.9366  
Epoch 277/1000

145/145 [=====] - 1s 4ms/step - loss: 0.0772 -  
accuracy: 0.9717 - val\_loss: 0.1770 - val\_accuracy: 0.9421  
Epoch 278/1000  
145/145 [=====] - 1s 4ms/step - loss: 0.0744 -  
accuracy: 0.9717 - val\_loss: 0.1823 - val\_accuracy: 0.9449  
Epoch 279/1000  
145/145 [=====] - 1s 4ms/step - loss: 0.0736 -  
accuracy: 0.9731 - val\_loss: 0.1840 - val\_accuracy: 0.9421  
Epoch 280/1000  
145/145 [=====] - 1s 4ms/step - loss: 0.0741 -  
accuracy: 0.9696 - val\_loss: 0.1804 - val\_accuracy: 0.9421  
Epoch 281/1000  
145/145 [=====] - 1s 4ms/step - loss: 0.0753 -  
accuracy: 0.9703 - val\_loss: 0.1930 - val\_accuracy: 0.9366  
Epoch 282/1000  
145/145 [=====] - 1s 4ms/step - loss: 0.0773 -  
accuracy: 0.9710 - val\_loss: 0.1707 - val\_accuracy: 0.9339  
Epoch 283/1000  
145/145 [=====] - 1s 4ms/step - loss: 0.0744 -  
accuracy: 0.9703 - val\_loss: 0.1744 - val\_accuracy: 0.9421  
Epoch 284/1000  
145/145 [=====] - 1s 4ms/step - loss: 0.0807 -  
accuracy: 0.9689 - val\_loss: 0.1894 - val\_accuracy: 0.9449  
Epoch 285/1000  
145/145 [=====] - 1s 4ms/step - loss: 0.0741 -  
accuracy: 0.9710 - val\_loss: 0.2384 - val\_accuracy: 0.9394  
Epoch 286/1000  
145/145 [=====] - 1s 4ms/step - loss: 0.0782 -  
accuracy: 0.9703 - val\_loss: 0.1790 - val\_accuracy: 0.9449  
Epoch 287/1000  
145/145 [=====] - 1s 4ms/step - loss: 0.0762 -  
accuracy: 0.9683 - val\_loss: 0.1946 - val\_accuracy: 0.9449  
Epoch 288/1000  
145/145 [=====] - 1s 4ms/step - loss: 0.0774 -  
accuracy: 0.9717 - val\_loss: 0.2076 - val\_accuracy: 0.9394  
Epoch 289/1000  
145/145 [=====] - 1s 4ms/step - loss: 0.0768 -  
accuracy: 0.9696 - val\_loss: 0.1669 - val\_accuracy: 0.9421  
Epoch 290/1000  
145/145 [=====] - 1s 4ms/step - loss: 0.0768 -  
accuracy: 0.9731 - val\_loss: 0.1813 - val\_accuracy: 0.9449  
Epoch 291/1000  
145/145 [=====] - 1s 3ms/step - loss: 0.0759 -  
accuracy: 0.9717 - val\_loss: 0.1920 - val\_accuracy: 0.9394  
Epoch 292/1000  
145/145 [=====] - 1s 4ms/step - loss: 0.0772 -  
accuracy: 0.9724 - val\_loss: 0.1850 - val\_accuracy: 0.9394  
Epoch 293/1000

145/145 [=====] - 1s 4ms/step - loss: 0.0767 -  
accuracy: 0.9717 - val\_loss: 0.1850 - val\_accuracy: 0.9394  
Epoch 294/1000  
145/145 [=====] - 1s 4ms/step - loss: 0.0780 -  
accuracy: 0.9731 - val\_loss: 0.1760 - val\_accuracy: 0.9421  
Epoch 295/1000  
145/145 [=====] - 1s 4ms/step - loss: 0.0796 -  
accuracy: 0.9710 - val\_loss: 0.1736 - val\_accuracy: 0.9449  
Epoch 296/1000  
145/145 [=====] - 1s 3ms/step - loss: 0.0774 -  
accuracy: 0.9703 - val\_loss: 0.2051 - val\_accuracy: 0.9449  
Epoch 297/1000  
145/145 [=====] - 1s 4ms/step - loss: 0.0759 -  
accuracy: 0.9724 - val\_loss: 0.1981 - val\_accuracy: 0.9394  
Epoch 298/1000  
145/145 [=====] - 1s 4ms/step - loss: 0.0740 -  
accuracy: 0.9717 - val\_loss: 0.1812 - val\_accuracy: 0.9421  
Epoch 299/1000  
145/145 [=====] - 1s 4ms/step - loss: 0.0768 -  
accuracy: 0.9710 - val\_loss: 0.1945 - val\_accuracy: 0.9449  
Epoch 300/1000  
145/145 [=====] - 1s 4ms/step - loss: 0.0763 -  
accuracy: 0.9717 - val\_loss: 0.1973 - val\_accuracy: 0.9366  
Epoch 301/1000  
145/145 [=====] - 1s 4ms/step - loss: 0.0785 -  
accuracy: 0.9689 - val\_loss: 0.1902 - val\_accuracy: 0.9394  
Epoch 302/1000  
145/145 [=====] - 1s 4ms/step - loss: 0.0782 -  
accuracy: 0.9703 - val\_loss: 0.2010 - val\_accuracy: 0.9394  
Epoch 303/1000  
145/145 [=====] - 1s 4ms/step - loss: 0.0747 -  
accuracy: 0.9717 - val\_loss: 0.1939 - val\_accuracy: 0.9421  
Epoch 304/1000  
145/145 [=====] - 1s 4ms/step - loss: 0.0739 -  
accuracy: 0.9724 - val\_loss: 0.1778 - val\_accuracy: 0.9421  
Epoch 305/1000  
145/145 [=====] - 1s 4ms/step - loss: 0.0760 -  
accuracy: 0.9717 - val\_loss: 0.2080 - val\_accuracy: 0.9339  
Epoch 306/1000  
145/145 [=====] - 1s 4ms/step - loss: 0.0763 -  
accuracy: 0.9703 - val\_loss: 0.1916 - val\_accuracy: 0.9449  
Epoch 307/1000  
145/145 [=====] - 1s 4ms/step - loss: 0.0738 -  
accuracy: 0.9724 - val\_loss: 0.2040 - val\_accuracy: 0.9449  
Epoch 308/1000  
145/145 [=====] - 1s 4ms/step - loss: 0.0768 -  
accuracy: 0.9689 - val\_loss: 0.1817 - val\_accuracy: 0.9394  
Epoch 309/1000

145/145 [=====] - 1s 4ms/step - loss: 0.0768 -  
accuracy: 0.9717 - val\_loss: 0.1916 - val\_accuracy: 0.9394  
Epoch 310/1000  
145/145 [=====] - 1s 4ms/step - loss: 0.0772 -  
accuracy: 0.9703 - val\_loss: 0.1802 - val\_accuracy: 0.9449  
Epoch 311/1000  
145/145 [=====] - 1s 4ms/step - loss: 0.0743 -  
accuracy: 0.9710 - val\_loss: 0.1841 - val\_accuracy: 0.9421  
Epoch 312/1000  
145/145 [=====] - 1s 4ms/step - loss: 0.0756 -  
accuracy: 0.9731 - val\_loss: 0.1896 - val\_accuracy: 0.9421  
Epoch 313/1000  
145/145 [=====] - 1s 3ms/step - loss: 0.0743 -  
accuracy: 0.9731 - val\_loss: 0.1767 - val\_accuracy: 0.9366  
Epoch 314/1000  
145/145 [=====] - 1s 4ms/step - loss: 0.0782 -  
accuracy: 0.9689 - val\_loss: 0.1687 - val\_accuracy: 0.9449  
Epoch 315/1000  
145/145 [=====] - 1s 4ms/step - loss: 0.0760 -  
accuracy: 0.9724 - val\_loss: 0.1858 - val\_accuracy: 0.9449  
Epoch 316/1000  
145/145 [=====] - 1s 4ms/step - loss: 0.0782 -  
accuracy: 0.9703 - val\_loss: 0.1789 - val\_accuracy: 0.9366  
Epoch 317/1000  
145/145 [=====] - 1s 4ms/step - loss: 0.0769 -  
accuracy: 0.9738 - val\_loss: 0.1791 - val\_accuracy: 0.9366  
Epoch 318/1000  
145/145 [=====] - 1s 4ms/step - loss: 0.0773 -  
accuracy: 0.9710 - val\_loss: 0.1962 - val\_accuracy: 0.9449  
Epoch 319/1000  
145/145 [=====] - 1s 4ms/step - loss: 0.0755 -  
accuracy: 0.9724 - val\_loss: 0.2084 - val\_accuracy: 0.9449  
Epoch 320/1000  
145/145 [=====] - 1s 4ms/step - loss: 0.0756 -  
accuracy: 0.9710 - val\_loss: 0.1811 - val\_accuracy: 0.9449  
Epoch 321/1000  
145/145 [=====] - 1s 4ms/step - loss: 0.0756 -  
accuracy: 0.9745 - val\_loss: 0.2064 - val\_accuracy: 0.9449  
Epoch 322/1000  
145/145 [=====] - 1s 4ms/step - loss: 0.0765 -  
accuracy: 0.9710 - val\_loss: 0.1986 - val\_accuracy: 0.9311  
Epoch 323/1000  
145/145 [=====] - 1s 4ms/step - loss: 0.0800 -  
accuracy: 0.9683 - val\_loss: 0.1880 - val\_accuracy: 0.9449  
Epoch 324/1000  
145/145 [=====] - 1s 4ms/step - loss: 0.0772 -  
accuracy: 0.9696 - val\_loss: 0.1948 - val\_accuracy: 0.9449  
Epoch 325/1000

145/145 [=====] - 1s 4ms/step - loss: 0.0769 -  
accuracy: 0.9724 - val\_loss: 0.1987 - val\_accuracy: 0.9449  
Epoch 326/1000  
145/145 [=====] - 1s 4ms/step - loss: 0.0751 -  
accuracy: 0.9703 - val\_loss: 0.2018 - val\_accuracy: 0.9449  
Epoch 327/1000  
145/145 [=====] - 1s 4ms/step - loss: 0.0781 -  
accuracy: 0.9724 - val\_loss: 0.1909 - val\_accuracy: 0.9394  
Epoch 328/1000  
145/145 [=====] - 1s 4ms/step - loss: 0.0749 -  
accuracy: 0.9717 - val\_loss: 0.1832 - val\_accuracy: 0.9449  
Epoch 329/1000  
145/145 [=====] - 1s 4ms/step - loss: 0.0755 -  
accuracy: 0.9724 - val\_loss: 0.1880 - val\_accuracy: 0.9394  
Epoch 330/1000  
145/145 [=====] - 1s 4ms/step - loss: 0.0736 -  
accuracy: 0.9738 - val\_loss: 0.1946 - val\_accuracy: 0.9366  
Epoch 331/1000  
145/145 [=====] - 1s 3ms/step - loss: 0.0798 -  
accuracy: 0.9696 - val\_loss: 0.1917 - val\_accuracy: 0.9449  
Epoch 332/1000  
145/145 [=====] - 1s 4ms/step - loss: 0.0779 -  
accuracy: 0.9724 - val\_loss: 0.2246 - val\_accuracy: 0.9449  
Epoch 333/1000  
145/145 [=====] - 1s 4ms/step - loss: 0.0797 -  
accuracy: 0.9717 - val\_loss: 0.1821 - val\_accuracy: 0.9449  
Epoch 334/1000  
145/145 [=====] - 1s 4ms/step - loss: 0.0756 -  
accuracy: 0.9703 - val\_loss: 0.1829 - val\_accuracy: 0.9449  
Epoch 335/1000  
145/145 [=====] - 1s 4ms/step - loss: 0.0748 -  
accuracy: 0.9717 - val\_loss: 0.2058 - val\_accuracy: 0.9449  
Epoch 336/1000  
145/145 [=====] - 1s 4ms/step - loss: 0.0756 -  
accuracy: 0.9724 - val\_loss: 0.1781 - val\_accuracy: 0.9366  
Epoch 337/1000  
145/145 [=====] - 1s 4ms/step - loss: 0.0769 -  
accuracy: 0.9696 - val\_loss: 0.2187 - val\_accuracy: 0.9449  
Epoch 338/1000  
145/145 [=====] - 1s 4ms/step - loss: 0.0761 -  
accuracy: 0.9717 - val\_loss: 0.1839 - val\_accuracy: 0.9449  
Epoch 339/1000  
145/145 [=====] - 1s 4ms/step - loss: 0.0753 -  
accuracy: 0.9738 - val\_loss: 0.1842 - val\_accuracy: 0.9449  
Epoch 340/1000  
145/145 [=====] - 1s 4ms/step - loss: 0.0746 -  
accuracy: 0.9724 - val\_loss: 0.1891 - val\_accuracy: 0.9449  
Epoch 341/1000

145/145 [=====] - 1s 4ms/step - loss: 0.0764 -  
accuracy: 0.9710 - val\_loss: 0.1828 - val\_accuracy: 0.9421  
Epoch 342/1000  
145/145 [=====] - 1s 4ms/step - loss: 0.0747 -  
accuracy: 0.9710 - val\_loss: 0.1970 - val\_accuracy: 0.9449  
Epoch 343/1000  
145/145 [=====] - 1s 4ms/step - loss: 0.0771 -  
accuracy: 0.9703 - val\_loss: 0.1811 - val\_accuracy: 0.9394  
Epoch 344/1000  
145/145 [=====] - 1s 4ms/step - loss: 0.0743 -  
accuracy: 0.9717 - val\_loss: 0.1795 - val\_accuracy: 0.9449  
Epoch 345/1000  
145/145 [=====] - 1s 4ms/step - loss: 0.0750 -  
accuracy: 0.9696 - val\_loss: 0.1984 - val\_accuracy: 0.9449  
Epoch 346/1000  
145/145 [=====] - 1s 4ms/step - loss: 0.0768 -  
accuracy: 0.9696 - val\_loss: 0.2200 - val\_accuracy: 0.9449  
Epoch 347/1000  
145/145 [=====] - 1s 4ms/step - loss: 0.0740 -  
accuracy: 0.9724 - val\_loss: 0.2126 - val\_accuracy: 0.9339  
Epoch 348/1000  
145/145 [=====] - 1s 4ms/step - loss: 0.0778 -  
accuracy: 0.9717 - val\_loss: 0.1989 - val\_accuracy: 0.9449  
Epoch 349/1000  
145/145 [=====] - 1s 4ms/step - loss: 0.0753 -  
accuracy: 0.9724 - val\_loss: 0.1753 - val\_accuracy: 0.9366  
Epoch 350/1000  
145/145 [=====] - 1s 4ms/step - loss: 0.0773 -  
accuracy: 0.9696 - val\_loss: 0.2027 - val\_accuracy: 0.9449  
Epoch 351/1000  
145/145 [=====] - 1s 4ms/step - loss: 0.0749 -  
accuracy: 0.9689 - val\_loss: 0.2287 - val\_accuracy: 0.9449  
Epoch 352/1000  
145/145 [=====] - 1s 4ms/step - loss: 0.0831 -  
accuracy: 0.9683 - val\_loss: 0.2549 - val\_accuracy: 0.9366  
Epoch 353/1000  
145/145 [=====] - 1s 4ms/step - loss: 0.0855 -  
accuracy: 0.9689 - val\_loss: 0.1979 - val\_accuracy: 0.9449  
Epoch 354/1000  
145/145 [=====] - 1s 4ms/step - loss: 0.0721 -  
accuracy: 0.9710 - val\_loss: 0.2043 - val\_accuracy: 0.9394  
Epoch 355/1000  
145/145 [=====] - 1s 4ms/step - loss: 0.0715 -  
accuracy: 0.9731 - val\_loss: 0.1989 - val\_accuracy: 0.9366  
Epoch 356/1000  
145/145 [=====] - 1s 4ms/step - loss: 0.0747 -  
accuracy: 0.9745 - val\_loss: 0.1975 - val\_accuracy: 0.9366  
Epoch 357/1000

145/145 [=====] - 1s 4ms/step - loss: 0.0740 -  
accuracy: 0.9731 - val\_loss: 0.2117 - val\_accuracy: 0.9394  
Epoch 358/1000  
145/145 [=====] - 1s 4ms/step - loss: 0.0751 -  
accuracy: 0.9724 - val\_loss: 0.2084 - val\_accuracy: 0.9394  
Epoch 359/1000  
145/145 [=====] - 1s 4ms/step - loss: 0.0743 -  
accuracy: 0.9724 - val\_loss: 0.2152 - val\_accuracy: 0.9394  
Epoch 360/1000  
145/145 [=====] - 1s 4ms/step - loss: 0.0746 -  
accuracy: 0.9703 - val\_loss: 0.1788 - val\_accuracy: 0.9421  
Epoch 361/1000  
145/145 [=====] - 1s 4ms/step - loss: 0.0768 -  
accuracy: 0.9724 - val\_loss: 0.1872 - val\_accuracy: 0.9394  
Epoch 362/1000  
145/145 [=====] - 1s 4ms/step - loss: 0.0760 -  
accuracy: 0.9717 - val\_loss: 0.2079 - val\_accuracy: 0.9394  
Epoch 363/1000  
145/145 [=====] - 1s 4ms/step - loss: 0.0769 -  
accuracy: 0.9717 - val\_loss: 0.1809 - val\_accuracy: 0.9421  
Epoch 364/1000  
145/145 [=====] - 1s 4ms/step - loss: 0.0738 -  
accuracy: 0.9676 - val\_loss: 0.1964 - val\_accuracy: 0.9421  
Epoch 365/1000  
145/145 [=====] - 1s 4ms/step - loss: 0.0756 -  
accuracy: 0.9710 - val\_loss: 0.1881 - val\_accuracy: 0.9394  
Epoch 366/1000  
145/145 [=====] - 1s 4ms/step - loss: 0.0776 -  
accuracy: 0.9731 - val\_loss: 0.2155 - val\_accuracy: 0.9449  
Epoch 367/1000  
145/145 [=====] - 1s 4ms/step - loss: 0.0755 -  
accuracy: 0.9703 - val\_loss: 0.1802 - val\_accuracy: 0.9394  
Epoch 368/1000  
145/145 [=====] - 1s 4ms/step - loss: 0.0755 -  
accuracy: 0.9731 - val\_loss: 0.2207 - val\_accuracy: 0.9394  
Epoch 369/1000  
145/145 [=====] - 1s 4ms/step - loss: 0.0749 -  
accuracy: 0.9710 - val\_loss: 0.1779 - val\_accuracy: 0.9421  
Epoch 370/1000  
145/145 [=====] - 1s 4ms/step - loss: 0.0759 -  
accuracy: 0.9703 - val\_loss: 0.1932 - val\_accuracy: 0.9421  
Epoch 371/1000  
145/145 [=====] - 1s 4ms/step - loss: 0.0751 -  
accuracy: 0.9689 - val\_loss: 0.1920 - val\_accuracy: 0.9366  
Epoch 372/1000  
145/145 [=====] - 1s 4ms/step - loss: 0.0760 -  
accuracy: 0.9724 - val\_loss: 0.1983 - val\_accuracy: 0.9394  
Epoch 373/1000

145/145 [=====] - 1s 4ms/step - loss: 0.0780 -  
accuracy: 0.9703 - val\_loss: 0.1760 - val\_accuracy: 0.9421  
Epoch 374/1000  
145/145 [=====] - 1s 4ms/step - loss: 0.0778 -  
accuracy: 0.9689 - val\_loss: 0.1875 - val\_accuracy: 0.9449  
Epoch 375/1000  
145/145 [=====] - 1s 4ms/step - loss: 0.0748 -  
accuracy: 0.9703 - val\_loss: 0.2028 - val\_accuracy: 0.9421  
Epoch 376/1000  
145/145 [=====] - 1s 4ms/step - loss: 0.0732 -  
accuracy: 0.9724 - val\_loss: 0.2132 - val\_accuracy: 0.9339  
Epoch 377/1000  
145/145 [=====] - 1s 4ms/step - loss: 0.0783 -  
accuracy: 0.9669 - val\_loss: 0.1923 - val\_accuracy: 0.9421  
Epoch 378/1000  
145/145 [=====] - 1s 4ms/step - loss: 0.0731 -  
accuracy: 0.9731 - val\_loss: 0.1870 - val\_accuracy: 0.9449  
Epoch 379/1000  
145/145 [=====] - 1s 4ms/step - loss: 0.0764 -  
accuracy: 0.9703 - val\_loss: 0.1828 - val\_accuracy: 0.9366  
Epoch 380/1000  
145/145 [=====] - 1s 4ms/step - loss: 0.0751 -  
accuracy: 0.9710 - val\_loss: 0.2040 - val\_accuracy: 0.9449  
Epoch 381/1000  
145/145 [=====] - 1s 4ms/step - loss: 0.0777 -  
accuracy: 0.9689 - val\_loss: 0.2094 - val\_accuracy: 0.9394  
Epoch 382/1000  
145/145 [=====] - 1s 4ms/step - loss: 0.0758 -  
accuracy: 0.9703 - val\_loss: 0.1990 - val\_accuracy: 0.9394  
Epoch 383/1000  
145/145 [=====] - 1s 4ms/step - loss: 0.0772 -  
accuracy: 0.9703 - val\_loss: 0.1894 - val\_accuracy: 0.9394  
Epoch 384/1000  
145/145 [=====] - 1s 4ms/step - loss: 0.0742 -  
accuracy: 0.9710 - val\_loss: 0.1924 - val\_accuracy: 0.9421  
Epoch 385/1000  
145/145 [=====] - 1s 4ms/step - loss: 0.0764 -  
accuracy: 0.9731 - val\_loss: 0.1910 - val\_accuracy: 0.9394  
Epoch 386/1000  
145/145 [=====] - 1s 4ms/step - loss: 0.0748 -  
accuracy: 0.9717 - val\_loss: 0.1946 - val\_accuracy: 0.9449  
Epoch 387/1000  
145/145 [=====] - 1s 4ms/step - loss: 0.0756 -  
accuracy: 0.9710 - val\_loss: 0.1934 - val\_accuracy: 0.9394  
Epoch 388/1000  
145/145 [=====] - 1s 4ms/step - loss: 0.0751 -  
accuracy: 0.9703 - val\_loss: 0.1844 - val\_accuracy: 0.9449  
Epoch 389/1000



145/145 [=====] - 1s 4ms/step - loss: 0.0747 -  
accuracy: 0.9724 - val\_loss: 0.1997 - val\_accuracy: 0.9394  
Epoch 390/1000  
145/145 [=====] - 1s 4ms/step - loss: 0.0769 -  
accuracy: 0.9717 - val\_loss: 0.1857 - val\_accuracy: 0.9449  
Epoch 391/1000  
145/145 [=====] - 1s 4ms/step - loss: 0.0757 -  
accuracy: 0.9703 - val\_loss: 0.1759 - val\_accuracy: 0.9366  
Epoch 392/1000  
145/145 [=====] - 1s 4ms/step - loss: 0.0774 -  
accuracy: 0.9710 - val\_loss: 0.2234 - val\_accuracy: 0.9421  
Epoch 393/1000  
145/145 [=====] - 1s 4ms/step - loss: 0.0728 -  
accuracy: 0.9724 - val\_loss: 0.1955 - val\_accuracy: 0.9394  
Epoch 394/1000  
145/145 [=====] - 1s 4ms/step - loss: 0.0754 -  
accuracy: 0.9703 - val\_loss: 0.1770 - val\_accuracy: 0.9449  
Epoch 395/1000  
145/145 [=====] - 1s 4ms/step - loss: 0.0762 -  
accuracy: 0.9717 - val\_loss: 0.1709 - val\_accuracy: 0.9421  
Epoch 396/1000  
145/145 [=====] - 1s 4ms/step - loss: 0.0762 -  
accuracy: 0.9717 - val\_loss: 0.1968 - val\_accuracy: 0.9394  
Epoch 397/1000  
145/145 [=====] - 1s 4ms/step - loss: 0.0747 -  
accuracy: 0.9696 - val\_loss: 0.1992 - val\_accuracy: 0.9394  
Epoch 398/1000  
145/145 [=====] - 1s 4ms/step - loss: 0.0763 -  
accuracy: 0.9683 - val\_loss: 0.1695 - val\_accuracy: 0.9339  
Epoch 399/1000  
145/145 [=====] - 1s 4ms/step - loss: 0.0759 -  
accuracy: 0.9724 - val\_loss: 0.1938 - val\_accuracy: 0.9449  
Epoch 400/1000  
145/145 [=====] - 1s 4ms/step - loss: 0.0784 -  
accuracy: 0.9696 - val\_loss: 0.2005 - val\_accuracy: 0.9394  
Epoch 401/1000  
145/145 [=====] - 1s 4ms/step - loss: 0.0781 -  
accuracy: 0.9710 - val\_loss: 0.1843 - val\_accuracy: 0.9449  
Epoch 402/1000  
145/145 [=====] - 1s 4ms/step - loss: 0.0746 -  
accuracy: 0.9738 - val\_loss: 0.1927 - val\_accuracy: 0.9394  
Epoch 403/1000  
145/145 [=====] - 1s 4ms/step - loss: 0.0746 -  
accuracy: 0.9724 - val\_loss: 0.2127 - val\_accuracy: 0.9449  
Epoch 404/1000  
145/145 [=====] - 1s 4ms/step - loss: 0.0774 -  
accuracy: 0.9717 - val\_loss: 0.2006 - val\_accuracy: 0.9449  
Epoch 405/1000

145/145 [=====] - 1s 4ms/step - loss: 0.0759 -  
accuracy: 0.9710 - val\_loss: 0.1913 - val\_accuracy: 0.9421  
Epoch 406/1000  
145/145 [=====] - 1s 4ms/step - loss: 0.0757 -  
accuracy: 0.9717 - val\_loss: 0.2266 - val\_accuracy: 0.9449  
Epoch 407/1000  
145/145 [=====] - 1s 4ms/step - loss: 0.0765 -  
accuracy: 0.9724 - val\_loss: 0.1786 - val\_accuracy: 0.9394  
Epoch 408/1000  
145/145 [=====] - 1s 4ms/step - loss: 0.0768 -  
accuracy: 0.9703 - val\_loss: 0.1859 - val\_accuracy: 0.9449  
Epoch 409/1000  
145/145 [=====] - 1s 4ms/step - loss: 0.0737 -  
accuracy: 0.9724 - val\_loss: 0.1776 - val\_accuracy: 0.9394  
Epoch 410/1000  
145/145 [=====] - 1s 4ms/step - loss: 0.0759 -  
accuracy: 0.9703 - val\_loss: 0.1926 - val\_accuracy: 0.9394  
Epoch 411/1000  
145/145 [=====] - 1s 4ms/step - loss: 0.0745 -  
accuracy: 0.9703 - val\_loss: 0.2068 - val\_accuracy: 0.9394  
Epoch 412/1000  
145/145 [=====] - 1s 4ms/step - loss: 0.0794 -  
accuracy: 0.9703 - val\_loss: 0.1844 - val\_accuracy: 0.9366  
Epoch 413/1000  
145/145 [=====] - 1s 4ms/step - loss: 0.0750 -  
accuracy: 0.9738 - val\_loss: 0.2100 - val\_accuracy: 0.9394  
Epoch 414/1000  
145/145 [=====] - 1s 4ms/step - loss: 0.0729 -  
accuracy: 0.9738 - val\_loss: 0.1982 - val\_accuracy: 0.9449  
Epoch 415/1000  
145/145 [=====] - 1s 4ms/step - loss: 0.0736 -  
accuracy: 0.9696 - val\_loss: 0.1928 - val\_accuracy: 0.9366  
Epoch 416/1000  
145/145 [=====] - 1s 4ms/step - loss: 0.0768 -  
accuracy: 0.9710 - val\_loss: 0.2034 - val\_accuracy: 0.9421  
Epoch 417/1000  
145/145 [=====] - 1s 4ms/step - loss: 0.0750 -  
accuracy: 0.9731 - val\_loss: 0.1843 - val\_accuracy: 0.9449  
Epoch 418/1000  
145/145 [=====] - 1s 4ms/step - loss: 0.0770 -  
accuracy: 0.9703 - val\_loss: 0.1915 - val\_accuracy: 0.9421  
Epoch 419/1000  
145/145 [=====] - 1s 4ms/step - loss: 0.0760 -  
accuracy: 0.9710 - val\_loss: 0.2050 - val\_accuracy: 0.9449  
Epoch 420/1000  
145/145 [=====] - 1s 4ms/step - loss: 0.0715 -  
accuracy: 0.9717 - val\_loss: 0.2071 - val\_accuracy: 0.9394  
Epoch 421/1000

145/145 [=====] - 1s 4ms/step - loss: 0.0758 -  
accuracy: 0.9724 - val\_loss: 0.1736 - val\_accuracy: 0.9421  
Epoch 422/1000  
145/145 [=====] - 1s 4ms/step - loss: 0.0766 -  
accuracy: 0.9703 - val\_loss: 0.2093 - val\_accuracy: 0.9394  
Epoch 423/1000  
145/145 [=====] - 1s 4ms/step - loss: 0.0748 -  
accuracy: 0.9689 - val\_loss: 0.2006 - val\_accuracy: 0.9449  
Epoch 424/1000  
145/145 [=====] - 1s 4ms/step - loss: 0.0768 -  
accuracy: 0.9703 - val\_loss: 0.1853 - val\_accuracy: 0.9421  
Epoch 425/1000  
145/145 [=====] - 1s 4ms/step - loss: 0.0748 -  
accuracy: 0.9696 - val\_loss: 0.1847 - val\_accuracy: 0.9449  
Epoch 426/1000  
145/145 [=====] - 1s 4ms/step - loss: 0.0769 -  
accuracy: 0.9710 - val\_loss: 0.1960 - val\_accuracy: 0.9449  
Epoch 427/1000  
145/145 [=====] - 1s 4ms/step - loss: 0.0762 -  
accuracy: 0.9738 - val\_loss: 0.1698 - val\_accuracy: 0.9449  
Epoch 428/1000  
145/145 [=====] - 1s 4ms/step - loss: 0.0741 -  
accuracy: 0.9731 - val\_loss: 0.1797 - val\_accuracy: 0.9394  
Epoch 429/1000  
145/145 [=====] - 1s 4ms/step - loss: 0.0748 -  
accuracy: 0.9724 - val\_loss: 0.1703 - val\_accuracy: 0.9449  
Epoch 430/1000  
145/145 [=====] - 1s 4ms/step - loss: 0.0758 -  
accuracy: 0.9703 - val\_loss: 0.1917 - val\_accuracy: 0.9449  
Epoch 431/1000  
145/145 [=====] - 1s 4ms/step - loss: 0.0736 -  
accuracy: 0.9717 - val\_loss: 0.1733 - val\_accuracy: 0.9339  
Epoch 432/1000  
145/145 [=====] - 1s 4ms/step - loss: 0.0739 -  
accuracy: 0.9710 - val\_loss: 0.2137 - val\_accuracy: 0.9449  
Epoch 433/1000  
145/145 [=====] - 1s 4ms/step - loss: 0.0731 -  
accuracy: 0.9717 - val\_loss: 0.2316 - val\_accuracy: 0.9449  
Epoch 434/1000  
145/145 [=====] - 1s 4ms/step - loss: 0.0766 -  
accuracy: 0.9738 - val\_loss: 0.2101 - val\_accuracy: 0.9449  
Epoch 435/1000  
145/145 [=====] - 1s 4ms/step - loss: 0.0740 -  
accuracy: 0.9703 - val\_loss: 0.1889 - val\_accuracy: 0.9449  
Epoch 436/1000  
145/145 [=====] - 1s 4ms/step - loss: 0.0753 -  
accuracy: 0.9731 - val\_loss: 0.2043 - val\_accuracy: 0.9449  
Epoch 437/1000

145/145 [=====] - 1s 4ms/step - loss: 0.0772 -  
accuracy: 0.9703 - val\_loss: 0.1885 - val\_accuracy: 0.9449  
Epoch 438/1000  
145/145 [=====] - 1s 4ms/step - loss: 0.0761 -  
accuracy: 0.9724 - val\_loss: 0.1890 - val\_accuracy: 0.9421  
Epoch 439/1000  
145/145 [=====] - 1s 4ms/step - loss: 0.0742 -  
accuracy: 0.9703 - val\_loss: 0.1773 - val\_accuracy: 0.9449  
Epoch 440/1000  
145/145 [=====] - 1s 4ms/step - loss: 0.0731 -  
accuracy: 0.9738 - val\_loss: 0.1898 - val\_accuracy: 0.9449  
Epoch 441/1000  
145/145 [=====] - 1s 4ms/step - loss: 0.0762 -  
accuracy: 0.9703 - val\_loss: 0.1750 - val\_accuracy: 0.9449  
Epoch 442/1000  
145/145 [=====] - 1s 4ms/step - loss: 0.0753 -  
accuracy: 0.9696 - val\_loss: 0.1919 - val\_accuracy: 0.9366  
Epoch 443/1000  
145/145 [=====] - 1s 4ms/step - loss: 0.0737 -  
accuracy: 0.9731 - val\_loss: 0.2183 - val\_accuracy: 0.9449  
Epoch 444/1000  
145/145 [=====] - 1s 4ms/step - loss: 0.0749 -  
accuracy: 0.9731 - val\_loss: 0.1878 - val\_accuracy: 0.9449  
Epoch 445/1000  
145/145 [=====] - 1s 4ms/step - loss: 0.0772 -  
accuracy: 0.9696 - val\_loss: 0.2003 - val\_accuracy: 0.9449  
Epoch 446/1000  
145/145 [=====] - 1s 4ms/step - loss: 0.0752 -  
accuracy: 0.9724 - val\_loss: 0.1917 - val\_accuracy: 0.9394  
Epoch 447/1000  
145/145 [=====] - 1s 4ms/step - loss: 0.0709 -  
accuracy: 0.9738 - val\_loss: 0.2069 - val\_accuracy: 0.9394  
Epoch 448/1000  
145/145 [=====] - 1s 4ms/step - loss: 0.0764 -  
accuracy: 0.9738 - val\_loss: 0.2013 - val\_accuracy: 0.9449  
Epoch 449/1000  
145/145 [=====] - 1s 4ms/step - loss: 0.0732 -  
accuracy: 0.9689 - val\_loss: 0.2077 - val\_accuracy: 0.9394  
Epoch 450/1000  
145/145 [=====] - 1s 4ms/step - loss: 0.0807 -  
accuracy: 0.9689 - val\_loss: 0.2057 - val\_accuracy: 0.9449  
Epoch 451/1000  
145/145 [=====] - 1s 4ms/step - loss: 0.0761 -  
accuracy: 0.9683 - val\_loss: 0.2214 - val\_accuracy: 0.9449  
Epoch 452/1000  
145/145 [=====] - 1s 4ms/step - loss: 0.0735 -  
accuracy: 0.9717 - val\_loss: 0.2022 - val\_accuracy: 0.9449  
Epoch 453/1000

145/145 [=====] - 1s 4ms/step - loss: 0.0760 -  
accuracy: 0.9710 - val\_loss: 0.1809 - val\_accuracy: 0.9366  
Epoch 454/1000  
145/145 [=====] - 1s 4ms/step - loss: 0.0749 -  
accuracy: 0.9752 - val\_loss: 0.2188 - val\_accuracy: 0.9394  
Epoch 455/1000  
145/145 [=====] - 1s 4ms/step - loss: 0.0756 -  
accuracy: 0.9717 - val\_loss: 0.1981 - val\_accuracy: 0.9449  
Epoch 456/1000  
145/145 [=====] - 1s 4ms/step - loss: 0.0789 -  
accuracy: 0.9689 - val\_loss: 0.1993 - val\_accuracy: 0.9421  
Epoch 457/1000  
145/145 [=====] - 1s 4ms/step - loss: 0.0762 -  
accuracy: 0.9689 - val\_loss: 0.1904 - val\_accuracy: 0.9421  
Epoch 458/1000  
145/145 [=====] - 1s 4ms/step - loss: 0.0759 -  
accuracy: 0.9696 - val\_loss: 0.2446 - val\_accuracy: 0.9394  
Epoch 459/1000  
145/145 [=====] - 1s 4ms/step - loss: 0.0726 -  
accuracy: 0.9710 - val\_loss: 0.1896 - val\_accuracy: 0.9366  
Epoch 460/1000  
145/145 [=====] - 1s 4ms/step - loss: 0.0752 -  
accuracy: 0.9710 - val\_loss: 0.1950 - val\_accuracy: 0.9421  
Epoch 461/1000  
145/145 [=====] - 1s 4ms/step - loss: 0.0752 -  
accuracy: 0.9717 - val\_loss: 0.1749 - val\_accuracy: 0.9394  
Epoch 462/1000  
145/145 [=====] - 1s 4ms/step - loss: 0.0752 -  
accuracy: 0.9738 - val\_loss: 0.1996 - val\_accuracy: 0.9394  
Epoch 463/1000  
145/145 [=====] - 1s 4ms/step - loss: 0.0771 -  
accuracy: 0.9689 - val\_loss: 0.1771 - val\_accuracy: 0.9421  
Epoch 464/1000  
145/145 [=====] - 1s 4ms/step - loss: 0.0737 -  
accuracy: 0.9731 - val\_loss: 0.1903 - val\_accuracy: 0.9449  
Epoch 465/1000  
145/145 [=====] - 1s 4ms/step - loss: 0.0734 -  
accuracy: 0.9710 - val\_loss: 0.1927 - val\_accuracy: 0.9449  
Epoch 466/1000  
145/145 [=====] - 1s 5ms/step - loss: 0.0755 -  
accuracy: 0.9710 - val\_loss: 0.2048 - val\_accuracy: 0.9449  
Epoch 467/1000  
145/145 [=====] - 1s 4ms/step - loss: 0.0769 -  
accuracy: 0.9703 - val\_loss: 0.1841 - val\_accuracy: 0.9449  
Epoch 468/1000  
145/145 [=====] - 1s 4ms/step - loss: 0.0734 -  
accuracy: 0.9676 - val\_loss: 0.1867 - val\_accuracy: 0.9394  
Epoch 469/1000

145/145 [=====] - 1s 4ms/step - loss: 0.0745 -  
accuracy: 0.9710 - val\_loss: 0.1995 - val\_accuracy: 0.9449  
Epoch 470/1000  
145/145 [=====] - 1s 4ms/step - loss: 0.0757 -  
accuracy: 0.9703 - val\_loss: 0.1882 - val\_accuracy: 0.9421  
Epoch 471/1000  
145/145 [=====] - 1s 4ms/step - loss: 0.0767 -  
accuracy: 0.9717 - val\_loss: 0.1895 - val\_accuracy: 0.9449  
Epoch 472/1000  
145/145 [=====] - 1s 4ms/step - loss: 0.0780 -  
accuracy: 0.9703 - val\_loss: 0.1793 - val\_accuracy: 0.9394  
Epoch 473/1000  
145/145 [=====] - 1s 4ms/step - loss: 0.0738 -  
accuracy: 0.9710 - val\_loss: 0.2209 - val\_accuracy: 0.9394  
Epoch 474/1000  
145/145 [=====] - 1s 4ms/step - loss: 0.0754 -  
accuracy: 0.9696 - val\_loss: 0.1984 - val\_accuracy: 0.9421  
Epoch 475/1000  
145/145 [=====] - 1s 4ms/step - loss: 0.0770 -  
accuracy: 0.9696 - val\_loss: 0.1803 - val\_accuracy: 0.9449  
Epoch 476/1000  
145/145 [=====] - 1s 4ms/step - loss: 0.0745 -  
accuracy: 0.9738 - val\_loss: 0.2043 - val\_accuracy: 0.9449  
Epoch 477/1000  
145/145 [=====] - 1s 4ms/step - loss: 0.0769 -  
accuracy: 0.9683 - val\_loss: 0.1808 - val\_accuracy: 0.9394  
Epoch 478/1000  
145/145 [=====] - 1s 4ms/step - loss: 0.0749 -  
accuracy: 0.9738 - val\_loss: 0.1759 - val\_accuracy: 0.9449  
Epoch 479/1000  
145/145 [=====] - 1s 4ms/step - loss: 0.0753 -  
accuracy: 0.9717 - val\_loss: 0.1917 - val\_accuracy: 0.9394  
Epoch 480/1000  
145/145 [=====] - 1s 4ms/step - loss: 0.0751 -  
accuracy: 0.9683 - val\_loss: 0.2051 - val\_accuracy: 0.9394  
Epoch 481/1000  
145/145 [=====] - 1s 4ms/step - loss: 0.0764 -  
accuracy: 0.9717 - val\_loss: 0.1935 - val\_accuracy: 0.9394  
Epoch 482/1000  
145/145 [=====] - 1s 4ms/step - loss: 0.0756 -  
accuracy: 0.9710 - val\_loss: 0.2004 - val\_accuracy: 0.9449  
Epoch 483/1000  
145/145 [=====] - 1s 4ms/step - loss: 0.0748 -  
accuracy: 0.9731 - val\_loss: 0.2030 - val\_accuracy: 0.9394  
Epoch 484/1000  
145/145 [=====] - 1s 4ms/step - loss: 0.0745 -  
accuracy: 0.9724 - val\_loss: 0.2043 - val\_accuracy: 0.9449  
Epoch 485/1000

145/145 [=====] - 1s 4ms/step - loss: 0.0754 -  
accuracy: 0.9724 - val\_loss: 0.1984 - val\_accuracy: 0.9421  
Epoch 486/1000  
145/145 [=====] - 1s 4ms/step - loss: 0.0758 -  
accuracy: 0.9696 - val\_loss: 0.2044 - val\_accuracy: 0.9394  
Epoch 487/1000  
145/145 [=====] - 1s 4ms/step - loss: 0.0781 -  
accuracy: 0.9696 - val\_loss: 0.2021 - val\_accuracy: 0.9449  
Epoch 488/1000  
145/145 [=====] - 1s 4ms/step - loss: 0.0745 -  
accuracy: 0.9703 - val\_loss: 0.2126 - val\_accuracy: 0.9449  
Epoch 489/1000  
145/145 [=====] - 1s 4ms/step - loss: 0.0734 -  
accuracy: 0.9717 - val\_loss: 0.2122 - val\_accuracy: 0.9394  
Epoch 490/1000  
145/145 [=====] - 1s 4ms/step - loss: 0.0738 -  
accuracy: 0.9703 - val\_loss: 0.2027 - val\_accuracy: 0.9394  
Epoch 491/1000  
145/145 [=====] - 1s 4ms/step - loss: 0.0748 -  
accuracy: 0.9738 - val\_loss: 0.1869 - val\_accuracy: 0.9366  
Epoch 492/1000  
145/145 [=====] - 1s 4ms/step - loss: 0.0755 -  
accuracy: 0.9703 - val\_loss: 0.1875 - val\_accuracy: 0.9449  
Epoch 493/1000  
145/145 [=====] - 1s 4ms/step - loss: 0.0744 -  
accuracy: 0.9703 - val\_loss: 0.1910 - val\_accuracy: 0.9421  
Epoch 494/1000  
145/145 [=====] - 1s 4ms/step - loss: 0.0773 -  
accuracy: 0.9696 - val\_loss: 0.1956 - val\_accuracy: 0.9421  
Epoch 495/1000  
145/145 [=====] - 1s 4ms/step - loss: 0.0745 -  
accuracy: 0.9731 - val\_loss: 0.2083 - val\_accuracy: 0.9449  
Epoch 496/1000  
145/145 [=====] - 1s 4ms/step - loss: 0.0735 -  
accuracy: 0.9710 - val\_loss: 0.1796 - val\_accuracy: 0.9477  
Epoch 497/1000  
145/145 [=====] - 1s 4ms/step - loss: 0.0742 -  
accuracy: 0.9724 - val\_loss: 0.1961 - val\_accuracy: 0.9394  
Epoch 498/1000  
145/145 [=====] - 1s 4ms/step - loss: 0.0763 -  
accuracy: 0.9717 - val\_loss: 0.2127 - val\_accuracy: 0.9394  
Epoch 499/1000  
145/145 [=====] - 1s 4ms/step - loss: 0.0734 -  
accuracy: 0.9676 - val\_loss: 0.1858 - val\_accuracy: 0.9366  
Epoch 500/1000  
145/145 [=====] - 1s 4ms/step - loss: 0.0768 -  
accuracy: 0.9717 - val\_loss: 0.1864 - val\_accuracy: 0.9421  
Epoch 501/1000

145/145 [=====] - 1s 4ms/step - loss: 0.0751 -  
accuracy: 0.9731 - val\_loss: 0.1864 - val\_accuracy: 0.9394  
Epoch 502/1000  
145/145 [=====] - 1s 4ms/step - loss: 0.0773 -  
accuracy: 0.9703 - val\_loss: 0.2001 - val\_accuracy: 0.9394  
Epoch 503/1000  
145/145 [=====] - 1s 4ms/step - loss: 0.0742 -  
accuracy: 0.9717 - val\_loss: 0.1885 - val\_accuracy: 0.9421  
Epoch 504/1000  
145/145 [=====] - 1s 4ms/step - loss: 0.0732 -  
accuracy: 0.9703 - val\_loss: 0.2120 - val\_accuracy: 0.9366  
Epoch 505/1000  
145/145 [=====] - 1s 4ms/step - loss: 0.0758 -  
accuracy: 0.9703 - val\_loss: 0.1806 - val\_accuracy: 0.9421  
Epoch 506/1000  
145/145 [=====] - 1s 4ms/step - loss: 0.0754 -  
accuracy: 0.9717 - val\_loss: 0.1883 - val\_accuracy: 0.9449  
Epoch 507/1000  
145/145 [=====] - 1s 4ms/step - loss: 0.0752 -  
accuracy: 0.9689 - val\_loss: 0.2162 - val\_accuracy: 0.9449  
Epoch 508/1000  
145/145 [=====] - 1s 4ms/step - loss: 0.0748 -  
accuracy: 0.9703 - val\_loss: 0.1964 - val\_accuracy: 0.9449  
Epoch 509/1000  
145/145 [=====] - 1s 4ms/step - loss: 0.0749 -  
accuracy: 0.9703 - val\_loss: 0.2164 - val\_accuracy: 0.9394  
Epoch 510/1000  
145/145 [=====] - 1s 4ms/step - loss: 0.0758 -  
accuracy: 0.9738 - val\_loss: 0.2389 - val\_accuracy: 0.9449  
Epoch 511/1000  
145/145 [=====] - 1s 4ms/step - loss: 0.0750 -  
accuracy: 0.9710 - val\_loss: 0.1913 - val\_accuracy: 0.9421  
Epoch 512/1000  
145/145 [=====] - 1s 4ms/step - loss: 0.0731 -  
accuracy: 0.9738 - val\_loss: 0.1918 - val\_accuracy: 0.9449  
Epoch 513/1000  
145/145 [=====] - 1s 4ms/step - loss: 0.0755 -  
accuracy: 0.9731 - val\_loss: 0.2089 - val\_accuracy: 0.9449  
Epoch 514/1000  
145/145 [=====] - 1s 4ms/step - loss: 0.0768 -  
accuracy: 0.9731 - val\_loss: 0.2054 - val\_accuracy: 0.9311  
Epoch 515/1000  
145/145 [=====] - 1s 4ms/step - loss: 0.0781 -  
accuracy: 0.9703 - val\_loss: 0.1727 - val\_accuracy: 0.9421  
Epoch 516/1000  
145/145 [=====] - 1s 4ms/step - loss: 0.0775 -  
accuracy: 0.9717 - val\_loss: 0.1856 - val\_accuracy: 0.9449  
Epoch 517/1000



145/145 [=====] - 1s 4ms/step - loss: 0.0736 -  
accuracy: 0.9717 - val\_loss: 0.1778 - val\_accuracy: 0.9449  
Epoch 518/1000  
145/145 [=====] - 1s 4ms/step - loss: 0.0730 -  
accuracy: 0.9703 - val\_loss: 0.2014 - val\_accuracy: 0.9449  
Epoch 519/1000  
145/145 [=====] - 1s 4ms/step - loss: 0.0773 -  
accuracy: 0.9696 - val\_loss: 0.1772 - val\_accuracy: 0.9394  
Epoch 520/1000  
145/145 [=====] - 1s 4ms/step - loss: 0.0751 -  
accuracy: 0.9738 - val\_loss: 0.1868 - val\_accuracy: 0.9394  
Epoch 521/1000  
145/145 [=====] - 1s 4ms/step - loss: 0.0730 -  
accuracy: 0.9703 - val\_loss: 0.2020 - val\_accuracy: 0.9449  
Epoch 522/1000  
145/145 [=====] - 1s 4ms/step - loss: 0.0750 -  
accuracy: 0.9731 - val\_loss: 0.2079 - val\_accuracy: 0.9421  
Epoch 523/1000  
145/145 [=====] - 1s 4ms/step - loss: 0.0765 -  
accuracy: 0.9703 - val\_loss: 0.1849 - val\_accuracy: 0.9421  
Epoch 524/1000  
145/145 [=====] - 1s 4ms/step - loss: 0.0797 -  
accuracy: 0.9710 - val\_loss: 0.2034 - val\_accuracy: 0.9449  
Epoch 525/1000  
145/145 [=====] - 1s 4ms/step - loss: 0.0723 -  
accuracy: 0.9758 - val\_loss: 0.2049 - val\_accuracy: 0.9394  
Epoch 526/1000  
145/145 [=====] - 1s 4ms/step - loss: 0.0756 -  
accuracy: 0.9696 - val\_loss: 0.2071 - val\_accuracy: 0.9394  
Epoch 527/1000  
145/145 [=====] - 1s 4ms/step - loss: 0.0729 -  
accuracy: 0.9703 - val\_loss: 0.1918 - val\_accuracy: 0.9366  
Epoch 528/1000  
145/145 [=====] - 1s 4ms/step - loss: 0.0749 -  
accuracy: 0.9731 - val\_loss: 0.1983 - val\_accuracy: 0.9449  
Epoch 529/1000  
145/145 [=====] - 1s 4ms/step - loss: 0.0764 -  
accuracy: 0.9703 - val\_loss: 0.1949 - val\_accuracy: 0.9366  
Epoch 530/1000  
145/145 [=====] - 1s 4ms/step - loss: 0.0775 -  
accuracy: 0.9717 - val\_loss: 0.2039 - val\_accuracy: 0.9449  
Epoch 531/1000  
145/145 [=====] - 1s 4ms/step - loss: 0.0738 -  
accuracy: 0.9696 - val\_loss: 0.1975 - val\_accuracy: 0.9366  
Epoch 532/1000  
145/145 [=====] - 1s 4ms/step - loss: 0.0748 -  
accuracy: 0.9717 - val\_loss: 0.2140 - val\_accuracy: 0.9449  
Epoch 533/1000

145/145 [=====] - 1s 4ms/step - loss: 0.0748 -  
accuracy: 0.9724 - val\_loss: 0.2074 - val\_accuracy: 0.9449  
Epoch 534/1000  
145/145 [=====] - 1s 4ms/step - loss: 0.0749 -  
accuracy: 0.9710 - val\_loss: 0.1929 - val\_accuracy: 0.9366  
Epoch 535/1000  
145/145 [=====] - 1s 4ms/step - loss: 0.0747 -  
accuracy: 0.9717 - val\_loss: 0.1784 - val\_accuracy: 0.9421  
Epoch 536/1000  
145/145 [=====] - 1s 4ms/step - loss: 0.0729 -  
accuracy: 0.9745 - val\_loss: 0.2030 - val\_accuracy: 0.9366  
Epoch 537/1000  
145/145 [=====] - 1s 4ms/step - loss: 0.0748 -  
accuracy: 0.9717 - val\_loss: 0.1807 - val\_accuracy: 0.9449  
Epoch 538/1000  
145/145 [=====] - 1s 4ms/step - loss: 0.0753 -  
accuracy: 0.9724 - val\_loss: 0.2279 - val\_accuracy: 0.9394  
Epoch 539/1000  
145/145 [=====] - 1s 4ms/step - loss: 0.0815 -  
accuracy: 0.9696 - val\_loss: 0.1860 - val\_accuracy: 0.9449  
Epoch 540/1000  
145/145 [=====] - 1s 4ms/step - loss: 0.0733 -  
accuracy: 0.9724 - val\_loss: 0.2102 - val\_accuracy: 0.9339  
Epoch 541/1000  
145/145 [=====] - 1s 4ms/step - loss: 0.0740 -  
accuracy: 0.9717 - val\_loss: 0.2040 - val\_accuracy: 0.9394  
Epoch 542/1000  
145/145 [=====] - 1s 4ms/step - loss: 0.0759 -  
accuracy: 0.9703 - val\_loss: 0.1917 - val\_accuracy: 0.9449  
Epoch 543/1000  
145/145 [=====] - 1s 4ms/step - loss: 0.0738 -  
accuracy: 0.9710 - val\_loss: 0.1899 - val\_accuracy: 0.9421  
Epoch 544/1000  
145/145 [=====] - 1s 4ms/step - loss: 0.0751 -  
accuracy: 0.9731 - val\_loss: 0.1784 - val\_accuracy: 0.9394  
Epoch 545/1000  
145/145 [=====] - 1s 4ms/step - loss: 0.0749 -  
accuracy: 0.9703 - val\_loss: 0.1958 - val\_accuracy: 0.9394  
Epoch 546/1000  
145/145 [=====] - 1s 4ms/step - loss: 0.0749 -  
accuracy: 0.9676 - val\_loss: 0.2298 - val\_accuracy: 0.9394  
Epoch 547/1000  
145/145 [=====] - 1s 4ms/step - loss: 0.0766 -  
accuracy: 0.9738 - val\_loss: 0.1948 - val\_accuracy: 0.9449  
Epoch 548/1000  
145/145 [=====] - 1s 4ms/step - loss: 0.0737 -  
accuracy: 0.9717 - val\_loss: 0.2063 - val\_accuracy: 0.9449  
Epoch 549/1000

145/145 [=====] - 1s 4ms/step - loss: 0.0737 -  
accuracy: 0.9710 - val\_loss: 0.1911 - val\_accuracy: 0.9421  
Epoch 550/1000  
145/145 [=====] - 1s 4ms/step - loss: 0.0736 -  
accuracy: 0.9703 - val\_loss: 0.1923 - val\_accuracy: 0.9421  
Epoch 551/1000  
145/145 [=====] - 1s 4ms/step - loss: 0.0764 -  
accuracy: 0.9710 - val\_loss: 0.2214 - val\_accuracy: 0.9449  
Epoch 552/1000  
145/145 [=====] - 1s 4ms/step - loss: 0.0738 -  
accuracy: 0.9717 - val\_loss: 0.1926 - val\_accuracy: 0.9421  
Epoch 553/1000  
145/145 [=====] - 1s 4ms/step - loss: 0.0741 -  
accuracy: 0.9724 - val\_loss: 0.2101 - val\_accuracy: 0.9449  
Epoch 554/1000  
145/145 [=====] - 1s 4ms/step - loss: 0.0758 -  
accuracy: 0.9703 - val\_loss: 0.2038 - val\_accuracy: 0.9449  
Epoch 555/1000  
145/145 [=====] - 1s 4ms/step - loss: 0.0784 -  
accuracy: 0.9703 - val\_loss: 0.2018 - val\_accuracy: 0.9394  
Epoch 556/1000  
145/145 [=====] - 1s 4ms/step - loss: 0.0750 -  
accuracy: 0.9724 - val\_loss: 0.1994 - val\_accuracy: 0.9394  
Epoch 557/1000  
145/145 [=====] - 1s 4ms/step - loss: 0.0754 -  
accuracy: 0.9689 - val\_loss: 0.1943 - val\_accuracy: 0.9449  
Epoch 558/1000  
145/145 [=====] - 1s 4ms/step - loss: 0.0746 -  
accuracy: 0.9710 - val\_loss: 0.2028 - val\_accuracy: 0.9366  
Epoch 559/1000  
145/145 [=====] - 1s 4ms/step - loss: 0.0766 -  
accuracy: 0.9710 - val\_loss: 0.1965 - val\_accuracy: 0.9449  
Epoch 560/1000  
145/145 [=====] - 1s 4ms/step - loss: 0.0738 -  
accuracy: 0.9724 - val\_loss: 0.1920 - val\_accuracy: 0.9421  
Epoch 561/1000  
145/145 [=====] - 1s 4ms/step - loss: 0.0748 -  
accuracy: 0.9717 - val\_loss: 0.2031 - val\_accuracy: 0.9394  
Epoch 562/1000  
145/145 [=====] - 1s 4ms/step - loss: 0.0738 -  
accuracy: 0.9724 - val\_loss: 0.1810 - val\_accuracy: 0.9421  
Epoch 563/1000  
145/145 [=====] - 1s 4ms/step - loss: 0.0747 -  
accuracy: 0.9696 - val\_loss: 0.2021 - val\_accuracy: 0.9449  
Epoch 564/1000  
145/145 [=====] - 1s 4ms/step - loss: 0.0729 -  
accuracy: 0.9731 - val\_loss: 0.2277 - val\_accuracy: 0.9449  
Epoch 565/1000

145/145 [=====] - 1s 4ms/step - loss: 0.0737 -  
accuracy: 0.9724 - val\_loss: 0.1891 - val\_accuracy: 0.9366  
Epoch 566/1000  
145/145 [=====] - 1s 4ms/step - loss: 0.0733 -  
accuracy: 0.9724 - val\_loss: 0.1843 - val\_accuracy: 0.9366  
Epoch 567/1000  
145/145 [=====] - 1s 4ms/step - loss: 0.0754 -  
accuracy: 0.9710 - val\_loss: 0.2045 - val\_accuracy: 0.9366  
Epoch 568/1000  
145/145 [=====] - 1s 4ms/step - loss: 0.0738 -  
accuracy: 0.9717 - val\_loss: 0.2146 - val\_accuracy: 0.9394  
Epoch 569/1000  
145/145 [=====] - 1s 5ms/step - loss: 0.0740 -  
accuracy: 0.9703 - val\_loss: 0.1908 - val\_accuracy: 0.9366  
Epoch 570/1000  
145/145 [=====] - 1s 4ms/step - loss: 0.0807 -  
accuracy: 0.9689 - val\_loss: 0.2196 - val\_accuracy: 0.9311  
Epoch 571/1000  
145/145 [=====] - 1s 4ms/step - loss: 0.0809 -  
accuracy: 0.9696 - val\_loss: 0.1991 - val\_accuracy: 0.9339  
Epoch 572/1000  
145/145 [=====] - 1s 4ms/step - loss: 0.0762 -  
accuracy: 0.9710 - val\_loss: 0.2175 - val\_accuracy: 0.9394  
Epoch 573/1000  
145/145 [=====] - 1s 5ms/step - loss: 0.0728 -  
accuracy: 0.9731 - val\_loss: 0.2026 - val\_accuracy: 0.9449  
Epoch 574/1000  
145/145 [=====] - 1s 5ms/step - loss: 0.0714 -  
accuracy: 0.9710 - val\_loss: 0.1984 - val\_accuracy: 0.9421  
Epoch 575/1000  
145/145 [=====] - 1s 4ms/step - loss: 0.0733 -  
accuracy: 0.9703 - val\_loss: 0.1825 - val\_accuracy: 0.9421  
Epoch 576/1000  
145/145 [=====] - 1s 4ms/step - loss: 0.0737 -  
accuracy: 0.9717 - val\_loss: 0.1938 - val\_accuracy: 0.9449  
Epoch 577/1000  
145/145 [=====] - 1s 4ms/step - loss: 0.0745 -  
accuracy: 0.9717 - val\_loss: 0.1879 - val\_accuracy: 0.9449  
Epoch 578/1000  
145/145 [=====] - 1s 4ms/step - loss: 0.0729 -  
accuracy: 0.9724 - val\_loss: 0.1976 - val\_accuracy: 0.9394  
Epoch 579/1000  
145/145 [=====] - 1s 4ms/step - loss: 0.0752 -  
accuracy: 0.9731 - val\_loss: 0.1931 - val\_accuracy: 0.9366  
Epoch 580/1000  
145/145 [=====] - 1s 4ms/step - loss: 0.0710 -  
accuracy: 0.9696 - val\_loss: 0.2206 - val\_accuracy: 0.9394  
Epoch 581/1000

145/145 [=====] - 1s 4ms/step - loss: 0.0738 -  
accuracy: 0.9738 - val\_loss: 0.2137 - val\_accuracy: 0.9449  
Epoch 582/1000  
145/145 [=====] - 1s 4ms/step - loss: 0.0759 -  
accuracy: 0.9689 - val\_loss: 0.1937 - val\_accuracy: 0.9449  
Epoch 583/1000  
145/145 [=====] - 1s 4ms/step - loss: 0.0741 -  
accuracy: 0.9717 - val\_loss: 0.1973 - val\_accuracy: 0.9449  
Epoch 584/1000  
145/145 [=====] - 1s 4ms/step - loss: 0.0738 -  
accuracy: 0.9717 - val\_loss: 0.1988 - val\_accuracy: 0.9449  
Epoch 585/1000  
145/145 [=====] - 1s 4ms/step - loss: 0.0731 -  
accuracy: 0.9710 - val\_loss: 0.2089 - val\_accuracy: 0.9394  
Epoch 586/1000  
145/145 [=====] - 1s 4ms/step - loss: 0.0716 -  
accuracy: 0.9710 - val\_loss: 0.2114 - val\_accuracy: 0.9394  
Epoch 587/1000  
145/145 [=====] - 1s 4ms/step - loss: 0.0748 -  
accuracy: 0.9696 - val\_loss: 0.1962 - val\_accuracy: 0.9394  
Epoch 588/1000  
145/145 [=====] - 1s 4ms/step - loss: 0.0765 -  
accuracy: 0.9710 - val\_loss: 0.1886 - val\_accuracy: 0.9421  
Epoch 589/1000  
145/145 [=====] - 1s 4ms/step - loss: 0.0760 -  
accuracy: 0.9724 - val\_loss: 0.1993 - val\_accuracy: 0.9421  
Epoch 590/1000  
145/145 [=====] - 1s 4ms/step - loss: 0.0734 -  
accuracy: 0.9696 - val\_loss: 0.1971 - val\_accuracy: 0.9394  
Epoch 591/1000  
145/145 [=====] - 1s 4ms/step - loss: 0.0813 -  
accuracy: 0.9683 - val\_loss: 0.1830 - val\_accuracy: 0.9421  
Epoch 592/1000  
145/145 [=====] - 1s 4ms/step - loss: 0.0750 -  
accuracy: 0.9717 - val\_loss: 0.2034 - val\_accuracy: 0.9449  
Epoch 593/1000  
145/145 [=====] - 1s 4ms/step - loss: 0.0726 -  
accuracy: 0.9724 - val\_loss: 0.2032 - val\_accuracy: 0.9394  
Epoch 594/1000  
145/145 [=====] - 1s 4ms/step - loss: 0.0772 -  
accuracy: 0.9683 - val\_loss: 0.1880 - val\_accuracy: 0.9339  
Epoch 595/1000  
145/145 [=====] - 1s 4ms/step - loss: 0.0758 -  
accuracy: 0.9703 - val\_loss: 0.2191 - val\_accuracy: 0.9394  
Epoch 596/1000  
145/145 [=====] - 1s 4ms/step - loss: 0.0751 -  
accuracy: 0.9731 - val\_loss: 0.1885 - val\_accuracy: 0.9366  
Epoch 597/1000

145/145 [=====] - 1s 4ms/step - loss: 0.0763 -  
accuracy: 0.9703 - val\_loss: 0.1959 - val\_accuracy: 0.9449  
Epoch 598/1000  
145/145 [=====] - 1s 4ms/step - loss: 0.0740 -  
accuracy: 0.9724 - val\_loss: 0.2008 - val\_accuracy: 0.9449  
Epoch 599/1000  
145/145 [=====] - 1s 4ms/step - loss: 0.0723 -  
accuracy: 0.9696 - val\_loss: 0.2174 - val\_accuracy: 0.9421  
Epoch 600/1000  
145/145 [=====] - 1s 4ms/step - loss: 0.0751 -  
accuracy: 0.9689 - val\_loss: 0.2170 - val\_accuracy: 0.9394  
Epoch 601/1000  
145/145 [=====] - 1s 4ms/step - loss: 0.0763 -  
accuracy: 0.9717 - val\_loss: 0.1790 - val\_accuracy: 0.9449  
Epoch 602/1000  
145/145 [=====] - 1s 4ms/step - loss: 0.0756 -  
accuracy: 0.9676 - val\_loss: 0.2009 - val\_accuracy: 0.9449  
Epoch 603/1000  
145/145 [=====] - 1s 4ms/step - loss: 0.0747 -  
accuracy: 0.9703 - val\_loss: 0.1987 - val\_accuracy: 0.9366  
Epoch 604/1000  
145/145 [=====] - 1s 4ms/step - loss: 0.0724 -  
accuracy: 0.9717 - val\_loss: 0.1874 - val\_accuracy: 0.9394  
Epoch 605/1000  
145/145 [=====] - 1s 4ms/step - loss: 0.0764 -  
accuracy: 0.9717 - val\_loss: 0.1997 - val\_accuracy: 0.9449  
Epoch 606/1000  
145/145 [=====] - 1s 4ms/step - loss: 0.0749 -  
accuracy: 0.9710 - val\_loss: 0.2356 - val\_accuracy: 0.9449  
Epoch 607/1000  
145/145 [=====] - 1s 4ms/step - loss: 0.0740 -  
accuracy: 0.9703 - val\_loss: 0.2112 - val\_accuracy: 0.9449  
Epoch 608/1000  
145/145 [=====] - 1s 4ms/step - loss: 0.0731 -  
accuracy: 0.9724 - val\_loss: 0.1923 - val\_accuracy: 0.9421  
Epoch 609/1000  
145/145 [=====] - 1s 4ms/step - loss: 0.0744 -  
accuracy: 0.9703 - val\_loss: 0.2036 - val\_accuracy: 0.9394  
Epoch 610/1000  
145/145 [=====] - 1s 4ms/step - loss: 0.0749 -  
accuracy: 0.9703 - val\_loss: 0.2028 - val\_accuracy: 0.9394  
Epoch 611/1000  
145/145 [=====] - 1s 4ms/step - loss: 0.0778 -  
accuracy: 0.9696 - val\_loss: 0.2123 - val\_accuracy: 0.9449  
Epoch 612/1000  
145/145 [=====] - 1s 4ms/step - loss: 0.0759 -  
accuracy: 0.9703 - val\_loss: 0.1932 - val\_accuracy: 0.9421  
Epoch 613/1000

145/145 [=====] - 1s 5ms/step - loss: 0.0752 -  
accuracy: 0.9717 - val\_loss: 0.1997 - val\_accuracy: 0.9449  
Epoch 614/1000  
145/145 [=====] - 1s 4ms/step - loss: 0.0750 -  
accuracy: 0.9717 - val\_loss: 0.2257 - val\_accuracy: 0.9394  
Epoch 615/1000  
145/145 [=====] - 1s 4ms/step - loss: 0.0737 -  
accuracy: 0.9731 - val\_loss: 0.2205 - val\_accuracy: 0.9421  
Epoch 616/1000  
145/145 [=====] - 1s 4ms/step - loss: 0.0757 -  
accuracy: 0.9724 - val\_loss: 0.2009 - val\_accuracy: 0.9449  
Epoch 617/1000  
145/145 [=====] - 1s 4ms/step - loss: 0.0748 -  
accuracy: 0.9717 - val\_loss: 0.2164 - val\_accuracy: 0.9394  
Epoch 618/1000  
145/145 [=====] - 1s 4ms/step - loss: 0.0750 -  
accuracy: 0.9710 - val\_loss: 0.2241 - val\_accuracy: 0.9449  
Epoch 619/1000  
145/145 [=====] - 1s 4ms/step - loss: 0.0767 -  
accuracy: 0.9710 - val\_loss: 0.2317 - val\_accuracy: 0.9394  
Epoch 620/1000  
145/145 [=====] - 1s 4ms/step - loss: 0.0749 -  
accuracy: 0.9703 - val\_loss: 0.2012 - val\_accuracy: 0.9366  
Epoch 621/1000  
145/145 [=====] - 1s 4ms/step - loss: 0.0762 -  
accuracy: 0.9710 - val\_loss: 0.1913 - val\_accuracy: 0.9421  
Epoch 622/1000  
145/145 [=====] - 1s 4ms/step - loss: 0.0749 -  
accuracy: 0.9724 - val\_loss: 0.1975 - val\_accuracy: 0.9366  
Epoch 623/1000  
145/145 [=====] - 1s 4ms/step - loss: 0.0750 -  
accuracy: 0.9717 - val\_loss: 0.2020 - val\_accuracy: 0.9449  
Epoch 624/1000  
145/145 [=====] - 1s 4ms/step - loss: 0.0733 -  
accuracy: 0.9717 - val\_loss: 0.2186 - val\_accuracy: 0.9394  
Epoch 625/1000  
145/145 [=====] - 1s 4ms/step - loss: 0.0784 -  
accuracy: 0.9710 - val\_loss: 0.2166 - val\_accuracy: 0.9449  
Epoch 626/1000  
145/145 [=====] - 1s 4ms/step - loss: 0.0723 -  
accuracy: 0.9724 - val\_loss: 0.1911 - val\_accuracy: 0.9449  
Epoch 627/1000  
145/145 [=====] - 1s 5ms/step - loss: 0.0794 -  
accuracy: 0.9689 - val\_loss: 0.2210 - val\_accuracy: 0.9449  
Epoch 628/1000  
145/145 [=====] - 1s 4ms/step - loss: 0.0745 -  
accuracy: 0.9710 - val\_loss: 0.2101 - val\_accuracy: 0.9421  
Epoch 629/1000

145/145 [=====] - 1s 4ms/step - loss: 0.0748 -  
accuracy: 0.9724 - val\_loss: 0.2151 - val\_accuracy: 0.9449  
Epoch 630/1000  
145/145 [=====] - 1s 4ms/step - loss: 0.0745 -  
accuracy: 0.9731 - val\_loss: 0.2237 - val\_accuracy: 0.9394  
Epoch 631/1000  
145/145 [=====] - 1s 4ms/step - loss: 0.0767 -  
accuracy: 0.9683 - val\_loss: 0.1981 - val\_accuracy: 0.9449  
Epoch 632/1000  
145/145 [=====] - 1s 4ms/step - loss: 0.0737 -  
accuracy: 0.9724 - val\_loss: 0.1927 - val\_accuracy: 0.9449  
Epoch 633/1000  
145/145 [=====] - 1s 5ms/step - loss: 0.0760 -  
accuracy: 0.9724 - val\_loss: 0.2197 - val\_accuracy: 0.9449  
Epoch 634/1000  
145/145 [=====] - 1s 4ms/step - loss: 0.0749 -  
accuracy: 0.9717 - val\_loss: 0.1868 - val\_accuracy: 0.9394  
Epoch 635/1000  
145/145 [=====] - 1s 4ms/step - loss: 0.0737 -  
accuracy: 0.9703 - val\_loss: 0.1817 - val\_accuracy: 0.9394  
Epoch 636/1000  
145/145 [=====] - 1s 4ms/step - loss: 0.0736 -  
accuracy: 0.9717 - val\_loss: 0.1840 - val\_accuracy: 0.9449  
Epoch 637/1000  
145/145 [=====] - 1s 4ms/step - loss: 0.0736 -  
accuracy: 0.9724 - val\_loss: 0.2095 - val\_accuracy: 0.9421  
Epoch 638/1000  
145/145 [=====] - 1s 4ms/step - loss: 0.0779 -  
accuracy: 0.9703 - val\_loss: 0.1947 - val\_accuracy: 0.9449  
Epoch 639/1000  
145/145 [=====] - 1s 4ms/step - loss: 0.0733 -  
accuracy: 0.9745 - val\_loss: 0.1977 - val\_accuracy: 0.9449  
Epoch 640/1000  
145/145 [=====] - 1s 4ms/step - loss: 0.0790 -  
accuracy: 0.9662 - val\_loss: 0.2043 - val\_accuracy: 0.9339  
Epoch 641/1000  
145/145 [=====] - 1s 4ms/step - loss: 0.0742 -  
accuracy: 0.9738 - val\_loss: 0.2055 - val\_accuracy: 0.9449  
Epoch 642/1000  
145/145 [=====] - 1s 4ms/step - loss: 0.0771 -  
accuracy: 0.9696 - val\_loss: 0.2127 - val\_accuracy: 0.9421  
Epoch 643/1000  
145/145 [=====] - 1s 5ms/step - loss: 0.0745 -  
accuracy: 0.9731 - val\_loss: 0.2268 - val\_accuracy: 0.9394  
Epoch 644/1000  
145/145 [=====] - 1s 4ms/step - loss: 0.0731 -  
accuracy: 0.9696 - val\_loss: 0.2057 - val\_accuracy: 0.9394  
Epoch 645/1000



145/145 [=====] - 1s 4ms/step - loss: 0.0730 -  
accuracy: 0.9731 - val\_loss: 0.2091 - val\_accuracy: 0.9366  
Epoch 646/1000  
145/145 [=====] - 1s 4ms/step - loss: 0.0748 -  
accuracy: 0.9731 - val\_loss: 0.1905 - val\_accuracy: 0.9449  
Epoch 647/1000  
145/145 [=====] - 1s 4ms/step - loss: 0.0733 -  
accuracy: 0.9731 - val\_loss: 0.1943 - val\_accuracy: 0.9449  
Epoch 648/1000  
145/145 [=====] - 1s 4ms/step - loss: 0.0741 -  
accuracy: 0.9724 - val\_loss: 0.1887 - val\_accuracy: 0.9449  
Epoch 649/1000  
145/145 [=====] - 1s 4ms/step - loss: 0.0752 -  
accuracy: 0.9717 - val\_loss: 0.2028 - val\_accuracy: 0.9449  
Epoch 650/1000  
145/145 [=====] - 1s 4ms/step - loss: 0.0756 -  
accuracy: 0.9710 - val\_loss: 0.2007 - val\_accuracy: 0.9449  
Epoch 651/1000  
145/145 [=====] - 1s 4ms/step - loss: 0.0739 -  
accuracy: 0.9724 - val\_loss: 0.2133 - val\_accuracy: 0.9394  
Epoch 652/1000  
145/145 [=====] - 1s 4ms/step - loss: 0.0741 -  
accuracy: 0.9717 - val\_loss: 0.2078 - val\_accuracy: 0.9284  
Epoch 653/1000  
145/145 [=====] - 1s 4ms/step - loss: 0.0739 -  
accuracy: 0.9717 - val\_loss: 0.2183 - val\_accuracy: 0.9394  
Epoch 654/1000  
145/145 [=====] - 1s 4ms/step - loss: 0.0736 -  
accuracy: 0.9710 - val\_loss: 0.1976 - val\_accuracy: 0.9394  
Epoch 655/1000  
145/145 [=====] - 1s 4ms/step - loss: 0.0749 -  
accuracy: 0.9717 - val\_loss: 0.1972 - val\_accuracy: 0.9394  
Epoch 656/1000  
145/145 [=====] - 1s 4ms/step - loss: 0.0724 -  
accuracy: 0.9717 - val\_loss: 0.2107 - val\_accuracy: 0.9449  
Epoch 657/1000  
145/145 [=====] - 1s 4ms/step - loss: 0.0704 -  
accuracy: 0.9724 - val\_loss: 0.2179 - val\_accuracy: 0.9449  
Epoch 658/1000  
145/145 [=====] - 1s 4ms/step - loss: 0.0757 -  
accuracy: 0.9710 - val\_loss: 0.2017 - val\_accuracy: 0.9449  
Epoch 659/1000  
145/145 [=====] - 1s 4ms/step - loss: 0.0755 -  
accuracy: 0.9731 - val\_loss: 0.2067 - val\_accuracy: 0.9394  
Epoch 660/1000  
145/145 [=====] - 1s 4ms/step - loss: 0.0766 -  
accuracy: 0.9703 - val\_loss: 0.2297 - val\_accuracy: 0.9394  
Epoch 661/1000

145/145 [=====] - 1s 4ms/step - loss: 0.0733 -  
accuracy: 0.9717 - val\_loss: 0.1943 - val\_accuracy: 0.9394  
Epoch 662/1000  
145/145 [=====] - 1s 4ms/step - loss: 0.0751 -  
accuracy: 0.9683 - val\_loss: 0.2069 - val\_accuracy: 0.9449  
Epoch 663/1000  
145/145 [=====] - 1s 4ms/step - loss: 0.0740 -  
accuracy: 0.9717 - val\_loss: 0.2011 - val\_accuracy: 0.9394  
Epoch 664/1000  
145/145 [=====] - 1s 4ms/step - loss: 0.0747 -  
accuracy: 0.9703 - val\_loss: 0.1972 - val\_accuracy: 0.9449  
Epoch 665/1000  
145/145 [=====] - 1s 4ms/step - loss: 0.0747 -  
accuracy: 0.9717 - val\_loss: 0.1889 - val\_accuracy: 0.9449  
Epoch 666/1000  
145/145 [=====] - 1s 4ms/step - loss: 0.0725 -  
accuracy: 0.9731 - val\_loss: 0.2017 - val\_accuracy: 0.9449  
Epoch 667/1000  
145/145 [=====] - 1s 4ms/step - loss: 0.0732 -  
accuracy: 0.9717 - val\_loss: 0.2051 - val\_accuracy: 0.9449  
Epoch 668/1000  
145/145 [=====] - 1s 4ms/step - loss: 0.0772 -  
accuracy: 0.9724 - val\_loss: 0.1911 - val\_accuracy: 0.9421  
Epoch 669/1000  
145/145 [=====] - 1s 4ms/step - loss: 0.0749 -  
accuracy: 0.9724 - val\_loss: 0.1823 - val\_accuracy: 0.9394  
Epoch 670/1000  
145/145 [=====] - 1s 4ms/step - loss: 0.0744 -  
accuracy: 0.9738 - val\_loss: 0.1998 - val\_accuracy: 0.9449  
Epoch 671/1000  
145/145 [=====] - 1s 4ms/step - loss: 0.0766 -  
accuracy: 0.9696 - val\_loss: 0.2313 - val\_accuracy: 0.9394  
Epoch 672/1000  
145/145 [=====] - 1s 4ms/step - loss: 0.0759 -  
accuracy: 0.9696 - val\_loss: 0.2047 - val\_accuracy: 0.9449  
Epoch 673/1000  
145/145 [=====] - 1s 4ms/step - loss: 0.0731 -  
accuracy: 0.9731 - val\_loss: 0.1809 - val\_accuracy: 0.9339  
Epoch 674/1000  
145/145 [=====] - 1s 5ms/step - loss: 0.0761 -  
accuracy: 0.9703 - val\_loss: 0.1794 - val\_accuracy: 0.9394  
Epoch 675/1000  
145/145 [=====] - 1s 4ms/step - loss: 0.0722 -  
accuracy: 0.9731 - val\_loss: 0.1969 - val\_accuracy: 0.9449  
Epoch 676/1000  
145/145 [=====] - 1s 4ms/step - loss: 0.0736 -  
accuracy: 0.9731 - val\_loss: 0.2056 - val\_accuracy: 0.9394  
Epoch 677/1000

145/145 [=====] - 1s 4ms/step - loss: 0.0713 -  
accuracy: 0.9703 - val\_loss: 0.1999 - val\_accuracy: 0.9421  
Epoch 678/1000  
145/145 [=====] - 1s 4ms/step - loss: 0.0784 -  
accuracy: 0.9683 - val\_loss: 0.2010 - val\_accuracy: 0.9421  
Epoch 679/1000  
145/145 [=====] - 1s 4ms/step - loss: 0.0750 -  
accuracy: 0.9717 - val\_loss: 0.1980 - val\_accuracy: 0.9421  
Epoch 680/1000  
145/145 [=====] - 1s 4ms/step - loss: 0.0750 -  
accuracy: 0.9731 - val\_loss: 0.2052 - val\_accuracy: 0.9394  
Epoch 681/1000  
145/145 [=====] - 1s 4ms/step - loss: 0.0759 -  
accuracy: 0.9710 - val\_loss: 0.1713 - val\_accuracy: 0.9421  
Epoch 682/1000  
145/145 [=====] - 1s 5ms/step - loss: 0.0754 -  
accuracy: 0.9738 - val\_loss: 0.1919 - val\_accuracy: 0.9366  
Epoch 683/1000  
145/145 [=====] - 1s 4ms/step - loss: 0.0732 -  
accuracy: 0.9689 - val\_loss: 0.1972 - val\_accuracy: 0.9366  
Epoch 684/1000  
145/145 [=====] - 1s 4ms/step - loss: 0.0759 -  
accuracy: 0.9710 - val\_loss: 0.2064 - val\_accuracy: 0.9421  
Epoch 685/1000  
145/145 [=====] - 1s 4ms/step - loss: 0.0751 -  
accuracy: 0.9710 - val\_loss: 0.2210 - val\_accuracy: 0.9421  
Epoch 686/1000  
145/145 [=====] - 1s 4ms/step - loss: 0.0741 -  
accuracy: 0.9676 - val\_loss: 0.1971 - val\_accuracy: 0.9449  
Epoch 687/1000  
145/145 [=====] - 1s 4ms/step - loss: 0.0762 -  
accuracy: 0.9724 - val\_loss: 0.1945 - val\_accuracy: 0.9421  
Epoch 688/1000  
145/145 [=====] - 1s 4ms/step - loss: 0.0754 -  
accuracy: 0.9703 - val\_loss: 0.2111 - val\_accuracy: 0.9449  
Epoch 689/1000  
145/145 [=====] - 1s 4ms/step - loss: 0.0748 -  
accuracy: 0.9724 - val\_loss: 0.1981 - val\_accuracy: 0.9394  
Epoch 690/1000  
145/145 [=====] - 1s 4ms/step - loss: 0.0743 -  
accuracy: 0.9683 - val\_loss: 0.2023 - val\_accuracy: 0.9449  
Epoch 691/1000  
145/145 [=====] - 1s 4ms/step - loss: 0.0735 -  
accuracy: 0.9710 - val\_loss: 0.2232 - val\_accuracy: 0.9394  
Epoch 692/1000  
145/145 [=====] - 1s 4ms/step - loss: 0.0749 -  
accuracy: 0.9703 - val\_loss: 0.2051 - val\_accuracy: 0.9449  
Epoch 693/1000

145/145 [=====] - 1s 4ms/step - loss: 0.0744 -  
accuracy: 0.9710 - val\_loss: 0.2114 - val\_accuracy: 0.9449  
Epoch 694/1000  
145/145 [=====] - 1s 4ms/step - loss: 0.0747 -  
accuracy: 0.9696 - val\_loss: 0.1944 - val\_accuracy: 0.9421  
Epoch 695/1000  
145/145 [=====] - 1s 4ms/step - loss: 0.0763 -  
accuracy: 0.9710 - val\_loss: 0.1921 - val\_accuracy: 0.9449  
Epoch 696/1000  
145/145 [=====] - 1s 4ms/step - loss: 0.0725 -  
accuracy: 0.9724 - val\_loss: 0.1964 - val\_accuracy: 0.9421  
Epoch 697/1000  
145/145 [=====] - 1s 5ms/step - loss: 0.0722 -  
accuracy: 0.9724 - val\_loss: 0.2227 - val\_accuracy: 0.9394  
Epoch 698/1000  
145/145 [=====] - 1s 4ms/step - loss: 0.0762 -  
accuracy: 0.9683 - val\_loss: 0.2270 - val\_accuracy: 0.9449  
Epoch 699/1000  
145/145 [=====] - 1s 4ms/step - loss: 0.0763 -  
accuracy: 0.9703 - val\_loss: 0.2025 - val\_accuracy: 0.9394  
Epoch 700/1000  
145/145 [=====] - 1s 4ms/step - loss: 0.0746 -  
accuracy: 0.9717 - val\_loss: 0.2122 - val\_accuracy: 0.9449  
Epoch 701/1000  
145/145 [=====] - 1s 5ms/step - loss: 0.0746 -  
accuracy: 0.9724 - val\_loss: 0.1874 - val\_accuracy: 0.9449  
Epoch 702/1000  
145/145 [=====] - 1s 4ms/step - loss: 0.0749 -  
accuracy: 0.9717 - val\_loss: 0.1994 - val\_accuracy: 0.9449  
Epoch 703/1000  
145/145 [=====] - 1s 4ms/step - loss: 0.0738 -  
accuracy: 0.9724 - val\_loss: 0.2094 - val\_accuracy: 0.9394  
Epoch 704/1000  
145/145 [=====] - 1s 4ms/step - loss: 0.0768 -  
accuracy: 0.9710 - val\_loss: 0.1924 - val\_accuracy: 0.9421  
Epoch 705/1000  
145/145 [=====] - 1s 5ms/step - loss: 0.0756 -  
accuracy: 0.9717 - val\_loss: 0.1944 - val\_accuracy: 0.9449  
Epoch 706/1000  
145/145 [=====] - 1s 4ms/step - loss: 0.0739 -  
accuracy: 0.9724 - val\_loss: 0.1847 - val\_accuracy: 0.9449  
Epoch 707/1000  
145/145 [=====] - 1s 4ms/step - loss: 0.0771 -  
accuracy: 0.9696 - val\_loss: 0.2087 - val\_accuracy: 0.9449  
Epoch 708/1000  
145/145 [=====] - 1s 4ms/step - loss: 0.0743 -  
accuracy: 0.9696 - val\_loss: 0.1866 - val\_accuracy: 0.9449  
Epoch 709/1000

145/145 [=====] - 1s 4ms/step - loss: 0.0738 -  
accuracy: 0.9710 - val\_loss: 0.1924 - val\_accuracy: 0.9449  
Epoch 710/1000  
145/145 [=====] - 1s 4ms/step - loss: 0.0743 -  
accuracy: 0.9717 - val\_loss: 0.2016 - val\_accuracy: 0.9449  
Epoch 711/1000  
145/145 [=====] - 1s 4ms/step - loss: 0.0748 -  
accuracy: 0.9717 - val\_loss: 0.2279 - val\_accuracy: 0.9449  
Epoch 712/1000  
145/145 [=====] - 1s 4ms/step - loss: 0.0789 -  
accuracy: 0.9724 - val\_loss: 0.2033 - val\_accuracy: 0.9339  
Epoch 713/1000  
145/145 [=====] - 1s 4ms/step - loss: 0.0750 -  
accuracy: 0.9703 - val\_loss: 0.2066 - val\_accuracy: 0.9449  
Epoch 714/1000  
145/145 [=====] - 1s 5ms/step - loss: 0.0783 -  
accuracy: 0.9696 - val\_loss: 0.1894 - val\_accuracy: 0.9449  
Epoch 715/1000  
145/145 [=====] - 1s 4ms/step - loss: 0.0726 -  
accuracy: 0.9724 - val\_loss: 0.2181 - val\_accuracy: 0.9394  
Epoch 716/1000  
145/145 [=====] - 1s 5ms/step - loss: 0.0744 -  
accuracy: 0.9710 - val\_loss: 0.2065 - val\_accuracy: 0.9449  
Epoch 717/1000  
145/145 [=====] - 1s 4ms/step - loss: 0.0737 -  
accuracy: 0.9731 - val\_loss: 0.2080 - val\_accuracy: 0.9449  
Epoch 718/1000  
145/145 [=====] - 1s 5ms/step - loss: 0.0734 -  
accuracy: 0.9724 - val\_loss: 0.2025 - val\_accuracy: 0.9449  
Epoch 719/1000  
145/145 [=====] - 1s 5ms/step - loss: 0.0746 -  
accuracy: 0.9717 - val\_loss: 0.1944 - val\_accuracy: 0.9421  
Epoch 720/1000  
145/145 [=====] - 1s 4ms/step - loss: 0.0752 -  
accuracy: 0.9731 - val\_loss: 0.1930 - val\_accuracy: 0.9394  
Epoch 721/1000  
145/145 [=====] - 1s 5ms/step - loss: 0.0766 -  
accuracy: 0.9717 - val\_loss: 0.1925 - val\_accuracy: 0.9421  
Epoch 722/1000  
145/145 [=====] - 1s 5ms/step - loss: 0.0737 -  
accuracy: 0.9717 - val\_loss: 0.1922 - val\_accuracy: 0.9394  
Epoch 723/1000  
145/145 [=====] - 1s 4ms/step - loss: 0.0726 -  
accuracy: 0.9724 - val\_loss: 0.2043 - val\_accuracy: 0.9394  
Epoch 724/1000  
145/145 [=====] - 1s 4ms/step - loss: 0.0737 -  
accuracy: 0.9717 - val\_loss: 0.2200 - val\_accuracy: 0.9449  
Epoch 725/1000

145/145 [=====] - 1s 4ms/step - loss: 0.0746 -  
accuracy: 0.9703 - val\_loss: 0.2067 - val\_accuracy: 0.9449  
Epoch 726/1000  
145/145 [=====] - 1s 4ms/step - loss: 0.0710 -  
accuracy: 0.9724 - val\_loss: 0.2181 - val\_accuracy: 0.9449  
Epoch 727/1000  
145/145 [=====] - 1s 4ms/step - loss: 0.0764 -  
accuracy: 0.9710 - val\_loss: 0.1970 - val\_accuracy: 0.9394  
Epoch 728/1000  
145/145 [=====] - 1s 4ms/step - loss: 0.0746 -  
accuracy: 0.9724 - val\_loss: 0.1929 - val\_accuracy: 0.9449  
Epoch 729/1000  
145/145 [=====] - 1s 4ms/step - loss: 0.0737 -  
accuracy: 0.9724 - val\_loss: 0.1828 - val\_accuracy: 0.9449  
Epoch 730/1000  
145/145 [=====] - 1s 4ms/step - loss: 0.0743 -  
accuracy: 0.9717 - val\_loss: 0.2089 - val\_accuracy: 0.9449  
Epoch 731/1000  
145/145 [=====] - 1s 4ms/step - loss: 0.0732 -  
accuracy: 0.9717 - val\_loss: 0.2023 - val\_accuracy: 0.9421  
Epoch 732/1000  
145/145 [=====] - 1s 4ms/step - loss: 0.0741 -  
accuracy: 0.9696 - val\_loss: 0.1916 - val\_accuracy: 0.9421  
Epoch 733/1000  
145/145 [=====] - 1s 4ms/step - loss: 0.0734 -  
accuracy: 0.9731 - val\_loss: 0.2152 - val\_accuracy: 0.9394  
Epoch 734/1000  
145/145 [=====] - 1s 4ms/step - loss: 0.0732 -  
accuracy: 0.9710 - val\_loss: 0.2156 - val\_accuracy: 0.9421  
Epoch 735/1000  
145/145 [=====] - 1s 4ms/step - loss: 0.0752 -  
accuracy: 0.9703 - val\_loss: 0.2031 - val\_accuracy: 0.9366  
Epoch 736/1000  
145/145 [=====] - 1s 4ms/step - loss: 0.0781 -  
accuracy: 0.9710 - val\_loss: 0.2148 - val\_accuracy: 0.9394  
Epoch 737/1000  
145/145 [=====] - 1s 4ms/step - loss: 0.0733 -  
accuracy: 0.9703 - val\_loss: 0.2132 - val\_accuracy: 0.9394  
Epoch 738/1000  
145/145 [=====] - 1s 4ms/step - loss: 0.0737 -  
accuracy: 0.9696 - val\_loss: 0.2237 - val\_accuracy: 0.9394  
Epoch 739/1000  
145/145 [=====] - 1s 4ms/step - loss: 0.0741 -  
accuracy: 0.9703 - val\_loss: 0.2153 - val\_accuracy: 0.9394  
Epoch 740/1000  
145/145 [=====] - 1s 4ms/step - loss: 0.0752 -  
accuracy: 0.9724 - val\_loss: 0.2014 - val\_accuracy: 0.9449  
Epoch 741/1000

145/145 [=====] - 1s 4ms/step - loss: 0.0735 -  
accuracy: 0.9703 - val\_loss: 0.1972 - val\_accuracy: 0.9339  
Epoch 742/1000  
145/145 [=====] - 1s 4ms/step - loss: 0.0746 -  
accuracy: 0.9703 - val\_loss: 0.2066 - val\_accuracy: 0.9449  
Epoch 743/1000  
145/145 [=====] - 1s 4ms/step - loss: 0.0747 -  
accuracy: 0.9689 - val\_loss: 0.2067 - val\_accuracy: 0.9394  
Epoch 744/1000  
145/145 [=====] - 1s 4ms/step - loss: 0.0761 -  
accuracy: 0.9710 - val\_loss: 0.2024 - val\_accuracy: 0.9449  
Epoch 745/1000  
145/145 [=====] - 1s 4ms/step - loss: 0.0746 -  
accuracy: 0.9724 - val\_loss: 0.1951 - val\_accuracy: 0.9449  
Epoch 746/1000  
145/145 [=====] - 1s 4ms/step - loss: 0.0760 -  
accuracy: 0.9717 - val\_loss: 0.1995 - val\_accuracy: 0.9449  
Epoch 747/1000  
145/145 [=====] - 1s 4ms/step - loss: 0.0729 -  
accuracy: 0.9710 - val\_loss: 0.2228 - val\_accuracy: 0.9394  
Epoch 748/1000  
145/145 [=====] - 1s 4ms/step - loss: 0.0755 -  
accuracy: 0.9689 - val\_loss: 0.1999 - val\_accuracy: 0.9449  
Epoch 749/1000  
145/145 [=====] - 1s 4ms/step - loss: 0.0755 -  
accuracy: 0.9731 - val\_loss: 0.2028 - val\_accuracy: 0.9449  
Epoch 750/1000  
145/145 [=====] - 1s 4ms/step - loss: 0.0758 -  
accuracy: 0.9710 - val\_loss: 0.1807 - val\_accuracy: 0.9394  
Epoch 751/1000  
145/145 [=====] - 1s 4ms/step - loss: 0.0765 -  
accuracy: 0.9683 - val\_loss: 0.2038 - val\_accuracy: 0.9449  
Epoch 752/1000  
145/145 [=====] - 1s 4ms/step - loss: 0.0733 -  
accuracy: 0.9731 - val\_loss: 0.2270 - val\_accuracy: 0.9311  
Epoch 753/1000  
145/145 [=====] - 1s 4ms/step - loss: 0.0764 -  
accuracy: 0.9731 - val\_loss: 0.2043 - val\_accuracy: 0.9394  
Epoch 754/1000  
145/145 [=====] - 1s 4ms/step - loss: 0.0733 -  
accuracy: 0.9717 - val\_loss: 0.2058 - val\_accuracy: 0.9394  
Epoch 755/1000  
145/145 [=====] - 1s 4ms/step - loss: 0.0740 -  
accuracy: 0.9717 - val\_loss: 0.1939 - val\_accuracy: 0.9449  
Epoch 756/1000  
145/145 [=====] - 1s 4ms/step - loss: 0.0731 -  
accuracy: 0.9717 - val\_loss: 0.2057 - val\_accuracy: 0.9394  
Epoch 757/1000

145/145 [=====] - 1s 4ms/step - loss: 0.0737 -  
accuracy: 0.9738 - val\_loss: 0.1849 - val\_accuracy: 0.9394  
Epoch 758/1000  
145/145 [=====] - 1s 5ms/step - loss: 0.0739 -  
accuracy: 0.9683 - val\_loss: 0.1872 - val\_accuracy: 0.9339  
Epoch 759/1000  
145/145 [=====] - 1s 4ms/step - loss: 0.0750 -  
accuracy: 0.9696 - val\_loss: 0.1931 - val\_accuracy: 0.9339  
Epoch 760/1000  
145/145 [=====] - 1s 4ms/step - loss: 0.0799 -  
accuracy: 0.9655 - val\_loss: 0.2016 - val\_accuracy: 0.9421  
Epoch 761/1000  
145/145 [=====] - 1s 4ms/step - loss: 0.0722 -  
accuracy: 0.9731 - val\_loss: 0.2228 - val\_accuracy: 0.9449  
Epoch 762/1000  
145/145 [=====] - 1s 4ms/step - loss: 0.0739 -  
accuracy: 0.9731 - val\_loss: 0.2055 - val\_accuracy: 0.9449  
Epoch 763/1000  
145/145 [=====] - 1s 4ms/step - loss: 0.0754 -  
accuracy: 0.9717 - val\_loss: 0.2077 - val\_accuracy: 0.9421  
Epoch 764/1000  
145/145 [=====] - 1s 4ms/step - loss: 0.0754 -  
accuracy: 0.9710 - val\_loss: 0.2040 - val\_accuracy: 0.9421  
Epoch 765/1000  
145/145 [=====] - 1s 4ms/step - loss: 0.0745 -  
accuracy: 0.9703 - val\_loss: 0.2123 - val\_accuracy: 0.9449  
Epoch 766/1000  
145/145 [=====] - 1s 4ms/step - loss: 0.0723 -  
accuracy: 0.9724 - val\_loss: 0.1912 - val\_accuracy: 0.9421  
Epoch 767/1000  
145/145 [=====] - 1s 4ms/step - loss: 0.0713 -  
accuracy: 0.9724 - val\_loss: 0.1940 - val\_accuracy: 0.9394  
Epoch 768/1000  
145/145 [=====] - 1s 4ms/step - loss: 0.0738 -  
accuracy: 0.9724 - val\_loss: 0.2123 - val\_accuracy: 0.9394  
Epoch 769/1000  
145/145 [=====] - 1s 5ms/step - loss: 0.0733 -  
accuracy: 0.9724 - val\_loss: 0.2093 - val\_accuracy: 0.9449  
Epoch 770/1000  
145/145 [=====] - 1s 4ms/step - loss: 0.0740 -  
accuracy: 0.9717 - val\_loss: 0.1884 - val\_accuracy: 0.9366  
Epoch 771/1000  
145/145 [=====] - 1s 5ms/step - loss: 0.0723 -  
accuracy: 0.9717 - val\_loss: 0.1843 - val\_accuracy: 0.9394  
Epoch 772/1000  
145/145 [=====] - 1s 4ms/step - loss: 0.0744 -  
accuracy: 0.9724 - val\_loss: 0.2125 - val\_accuracy: 0.9366  
Epoch 773/1000



145/145 [=====] - 1s 4ms/step - loss: 0.0764 -  
accuracy: 0.9710 - val\_loss: 0.2110 - val\_accuracy: 0.9449  
Epoch 774/1000  
145/145 [=====] - 1s 4ms/step - loss: 0.0723 -  
accuracy: 0.9703 - val\_loss: 0.1887 - val\_accuracy: 0.9421  
Epoch 775/1000  
145/145 [=====] - 1s 4ms/step - loss: 0.0750 -  
accuracy: 0.9710 - val\_loss: 0.1978 - val\_accuracy: 0.9449  
Epoch 776/1000  
145/145 [=====] - 1s 4ms/step - loss: 0.0766 -  
accuracy: 0.9710 - val\_loss: 0.2129 - val\_accuracy: 0.9449  
Epoch 777/1000  
145/145 [=====] - 1s 4ms/step - loss: 0.0731 -  
accuracy: 0.9710 - val\_loss: 0.2113 - val\_accuracy: 0.9394  
Epoch 778/1000  
145/145 [=====] - 1s 4ms/step - loss: 0.0751 -  
accuracy: 0.9683 - val\_loss: 0.1982 - val\_accuracy: 0.9421  
Epoch 779/1000  
145/145 [=====] - 1s 4ms/step - loss: 0.0738 -  
accuracy: 0.9717 - val\_loss: 0.1906 - val\_accuracy: 0.9366  
Epoch 780/1000  
145/145 [=====] - 1s 4ms/step - loss: 0.0733 -  
accuracy: 0.9724 - val\_loss: 0.2145 - val\_accuracy: 0.9449  
Epoch 781/1000  
145/145 [=====] - 1s 4ms/step - loss: 0.0726 -  
accuracy: 0.9731 - val\_loss: 0.1893 - val\_accuracy: 0.9366  
Epoch 782/1000  
145/145 [=====] - 1s 4ms/step - loss: 0.0742 -  
accuracy: 0.9738 - val\_loss: 0.2157 - val\_accuracy: 0.9449  
Epoch 783/1000  
145/145 [=====] - 1s 4ms/step - loss: 0.0736 -  
accuracy: 0.9731 - val\_loss: 0.2065 - val\_accuracy: 0.9449  
Epoch 784/1000  
145/145 [=====] - 1s 4ms/step - loss: 0.0745 -  
accuracy: 0.9703 - val\_loss: 0.1930 - val\_accuracy: 0.9449  
Epoch 785/1000  
145/145 [=====] - 1s 4ms/step - loss: 0.0756 -  
accuracy: 0.9724 - val\_loss: 0.1994 - val\_accuracy: 0.9394  
Epoch 786/1000  
145/145 [=====] - 1s 5ms/step - loss: 0.0735 -  
accuracy: 0.9689 - val\_loss: 0.1786 - val\_accuracy: 0.9394  
Epoch 787/1000  
145/145 [=====] - 1s 4ms/step - loss: 0.0707 -  
accuracy: 0.9731 - val\_loss: 0.1980 - val\_accuracy: 0.9421  
Epoch 788/1000  
145/145 [=====] - 1s 5ms/step - loss: 0.0722 -  
accuracy: 0.9717 - val\_loss: 0.1956 - val\_accuracy: 0.9394  
Epoch 789/1000

145/145 [=====] - 1s 4ms/step - loss: 0.0733 -  
accuracy: 0.9731 - val\_loss: 0.2195 - val\_accuracy: 0.9449  
Epoch 790/1000  
145/145 [=====] - 1s 4ms/step - loss: 0.0756 -  
accuracy: 0.9710 - val\_loss: 0.1783 - val\_accuracy: 0.9394  
Epoch 791/1000  
145/145 [=====] - 1s 4ms/step - loss: 0.0733 -  
accuracy: 0.9717 - val\_loss: 0.2080 - val\_accuracy: 0.9449  
Epoch 792/1000  
145/145 [=====] - 1s 4ms/step - loss: 0.0743 -  
accuracy: 0.9724 - val\_loss: 0.2246 - val\_accuracy: 0.9394  
Epoch 793/1000  
145/145 [=====] - 1s 4ms/step - loss: 0.0745 -  
accuracy: 0.9717 - val\_loss: 0.1859 - val\_accuracy: 0.9421  
Epoch 794/1000  
145/145 [=====] - 1s 4ms/step - loss: 0.0745 -  
accuracy: 0.9724 - val\_loss: 0.1892 - val\_accuracy: 0.9339  
Epoch 795/1000  
145/145 [=====] - 1s 4ms/step - loss: 0.0747 -  
accuracy: 0.9738 - val\_loss: 0.2109 - val\_accuracy: 0.9394  
Epoch 796/1000  
145/145 [=====] - 1s 4ms/step - loss: 0.0763 -  
accuracy: 0.9676 - val\_loss: 0.1920 - val\_accuracy: 0.9421  
Epoch 797/1000  
145/145 [=====] - 1s 4ms/step - loss: 0.0745 -  
accuracy: 0.9683 - val\_loss: 0.1794 - val\_accuracy: 0.9366  
Epoch 798/1000  
145/145 [=====] - 1s 4ms/step - loss: 0.0754 -  
accuracy: 0.9731 - val\_loss: 0.2052 - val\_accuracy: 0.9449  
Epoch 799/1000  
145/145 [=====] - 1s 4ms/step - loss: 0.0730 -  
accuracy: 0.9724 - val\_loss: 0.1829 - val\_accuracy: 0.9421  
Epoch 800/1000  
145/145 [=====] - 1s 4ms/step - loss: 0.0734 -  
accuracy: 0.9717 - val\_loss: 0.2022 - val\_accuracy: 0.9449  
Epoch 801/1000  
145/145 [=====] - 1s 4ms/step - loss: 0.0745 -  
accuracy: 0.9703 - val\_loss: 0.1895 - val\_accuracy: 0.9449  
Epoch 802/1000  
145/145 [=====] - 1s 4ms/step - loss: 0.0738 -  
accuracy: 0.9724 - val\_loss: 0.1953 - val\_accuracy: 0.9449  
Epoch 803/1000  
145/145 [=====] - 1s 4ms/step - loss: 0.0737 -  
accuracy: 0.9724 - val\_loss: 0.1829 - val\_accuracy: 0.9421  
Epoch 804/1000  
145/145 [=====] - 1s 4ms/step - loss: 0.0740 -  
accuracy: 0.9731 - val\_loss: 0.2072 - val\_accuracy: 0.9449  
Epoch 805/1000

145/145 [=====] - 1s 4ms/step - loss: 0.0755 -  
accuracy: 0.9710 - val\_loss: 0.2231 - val\_accuracy: 0.9449  
Epoch 806/1000  
145/145 [=====] - 1s 4ms/step - loss: 0.0752 -  
accuracy: 0.9724 - val\_loss: 0.1867 - val\_accuracy: 0.9421  
Epoch 807/1000  
145/145 [=====] - 1s 4ms/step - loss: 0.0734 -  
accuracy: 0.9724 - val\_loss: 0.1855 - val\_accuracy: 0.9449  
Epoch 808/1000  
145/145 [=====] - 1s 4ms/step - loss: 0.0746 -  
accuracy: 0.9717 - val\_loss: 0.1865 - val\_accuracy: 0.9366  
Epoch 809/1000  
145/145 [=====] - 1s 4ms/step - loss: 0.0722 -  
accuracy: 0.9731 - val\_loss: 0.2015 - val\_accuracy: 0.9449  
Epoch 810/1000  
145/145 [=====] - 1s 5ms/step - loss: 0.0747 -  
accuracy: 0.9710 - val\_loss: 0.1974 - val\_accuracy: 0.9421  
Epoch 811/1000  
145/145 [=====] - 1s 5ms/step - loss: 0.0732 -  
accuracy: 0.9731 - val\_loss: 0.2041 - val\_accuracy: 0.9394  
Epoch 812/1000  
145/145 [=====] - 1s 4ms/step - loss: 0.0717 -  
accuracy: 0.9710 - val\_loss: 0.1896 - val\_accuracy: 0.9504  
Epoch 813/1000  
145/145 [=====] - 1s 4ms/step - loss: 0.0756 -  
accuracy: 0.9724 - val\_loss: 0.1856 - val\_accuracy: 0.9394  
Epoch 814/1000  
145/145 [=====] - 1s 4ms/step - loss: 0.0749 -  
accuracy: 0.9724 - val\_loss: 0.2037 - val\_accuracy: 0.9449  
Epoch 815/1000  
145/145 [=====] - 1s 4ms/step - loss: 0.0727 -  
accuracy: 0.9724 - val\_loss: 0.2332 - val\_accuracy: 0.9339  
Epoch 816/1000  
145/145 [=====] - 1s 5ms/step - loss: 0.0735 -  
accuracy: 0.9703 - val\_loss: 0.1859 - val\_accuracy: 0.9449  
Epoch 817/1000  
145/145 [=====] - 1s 4ms/step - loss: 0.0728 -  
accuracy: 0.9731 - val\_loss: 0.2197 - val\_accuracy: 0.9394  
Epoch 818/1000  
145/145 [=====] - 1s 4ms/step - loss: 0.0733 -  
accuracy: 0.9717 - val\_loss: 0.2089 - val\_accuracy: 0.9394  
Epoch 819/1000  
145/145 [=====] - 1s 4ms/step - loss: 0.0762 -  
accuracy: 0.9676 - val\_loss: 0.1906 - val\_accuracy: 0.9366  
Epoch 820/1000  
145/145 [=====] - 1s 4ms/step - loss: 0.0741 -  
accuracy: 0.9731 - val\_loss: 0.1925 - val\_accuracy: 0.9449  
Epoch 821/1000

145/145 [=====] - 1s 4ms/step - loss: 0.0749 -  
accuracy: 0.9703 - val\_loss: 0.1979 - val\_accuracy: 0.9449  
Epoch 822/1000  
145/145 [=====] - 1s 5ms/step - loss: 0.0735 -  
accuracy: 0.9710 - val\_loss: 0.1930 - val\_accuracy: 0.9421  
Epoch 823/1000  
145/145 [=====] - 1s 4ms/step - loss: 0.0755 -  
accuracy: 0.9703 - val\_loss: 0.1929 - val\_accuracy: 0.9366  
Epoch 824/1000  
145/145 [=====] - 1s 4ms/step - loss: 0.0732 -  
accuracy: 0.9710 - val\_loss: 0.1860 - val\_accuracy: 0.9394  
Epoch 825/1000  
145/145 [=====] - 1s 4ms/step - loss: 0.0734 -  
accuracy: 0.9738 - val\_loss: 0.1941 - val\_accuracy: 0.9394  
Epoch 826/1000  
145/145 [=====] - 1s 4ms/step - loss: 0.0716 -  
accuracy: 0.9676 - val\_loss: 0.1955 - val\_accuracy: 0.9449  
Epoch 827/1000  
145/145 [=====] - 1s 4ms/step - loss: 0.0755 -  
accuracy: 0.9703 - val\_loss: 0.1925 - val\_accuracy: 0.9449  
Epoch 828/1000  
145/145 [=====] - 1s 4ms/step - loss: 0.0746 -  
accuracy: 0.9724 - val\_loss: 0.1874 - val\_accuracy: 0.9394  
Epoch 829/1000  
145/145 [=====] - 1s 4ms/step - loss: 0.0875 -  
accuracy: 0.9724 - val\_loss: 0.2257 - val\_accuracy: 0.9366  
Epoch 830/1000  
145/145 [=====] - 1s 4ms/step - loss: 0.0729 -  
accuracy: 0.9717 - val\_loss: 0.2065 - val\_accuracy: 0.9366  
Epoch 831/1000  
145/145 [=====] - 1s 4ms/step - loss: 0.0727 -  
accuracy: 0.9724 - val\_loss: 0.1954 - val\_accuracy: 0.9394  
Epoch 832/1000  
145/145 [=====] - 1s 4ms/step - loss: 0.0743 -  
accuracy: 0.9710 - val\_loss: 0.1970 - val\_accuracy: 0.9394  
Epoch 833/1000  
145/145 [=====] - 1s 4ms/step - loss: 0.0750 -  
accuracy: 0.9710 - val\_loss: 0.1886 - val\_accuracy: 0.9421  
Epoch 834/1000  
145/145 [=====] - 1s 5ms/step - loss: 0.0706 -  
accuracy: 0.9710 - val\_loss: 0.2144 - val\_accuracy: 0.9421  
Epoch 835/1000  
145/145 [=====] - 1s 5ms/step - loss: 0.0748 -  
accuracy: 0.9731 - val\_loss: 0.2002 - val\_accuracy: 0.9449  
Epoch 836/1000  
145/145 [=====] - 1s 4ms/step - loss: 0.0730 -  
accuracy: 0.9710 - val\_loss: 0.2145 - val\_accuracy: 0.9449  
Epoch 837/1000

145/145 [=====] - 1s 4ms/step - loss: 0.0728 -  
accuracy: 0.9710 - val\_loss: 0.1937 - val\_accuracy: 0.9449  
Epoch 838/1000  
145/145 [=====] - 1s 4ms/step - loss: 0.0714 -  
accuracy: 0.9717 - val\_loss: 0.2089 - val\_accuracy: 0.9421  
Epoch 839/1000  
145/145 [=====] - 1s 4ms/step - loss: 0.0724 -  
accuracy: 0.9724 - val\_loss: 0.2185 - val\_accuracy: 0.9449  
Epoch 840/1000  
145/145 [=====] - 1s 4ms/step - loss: 0.0732 -  
accuracy: 0.9724 - val\_loss: 0.2040 - val\_accuracy: 0.9421  
Epoch 841/1000  
145/145 [=====] - 1s 4ms/step - loss: 0.0745 -  
accuracy: 0.9731 - val\_loss: 0.1904 - val\_accuracy: 0.9421  
Epoch 842/1000  
145/145 [=====] - 1s 4ms/step - loss: 0.0722 -  
accuracy: 0.9717 - val\_loss: 0.1972 - val\_accuracy: 0.9421  
Epoch 843/1000  
145/145 [=====] - 1s 4ms/step - loss: 0.0760 -  
accuracy: 0.9689 - val\_loss: 0.1909 - val\_accuracy: 0.9366  
Epoch 844/1000  
145/145 [=====] - 1s 4ms/step - loss: 0.0715 -  
accuracy: 0.9717 - val\_loss: 0.1961 - val\_accuracy: 0.9421  
Epoch 845/1000  
145/145 [=====] - 1s 5ms/step - loss: 0.0748 -  
accuracy: 0.9724 - val\_loss: 0.2050 - val\_accuracy: 0.9449  
Epoch 846/1000  
145/145 [=====] - 1s 5ms/step - loss: 0.0730 -  
accuracy: 0.9731 - val\_loss: 0.1863 - val\_accuracy: 0.9366  
Epoch 847/1000  
145/145 [=====] - 1s 4ms/step - loss: 0.0743 -  
accuracy: 0.9731 - val\_loss: 0.1926 - val\_accuracy: 0.9366  
Epoch 848/1000  
145/145 [=====] - 1s 5ms/step - loss: 0.0741 -  
accuracy: 0.9717 - val\_loss: 0.1863 - val\_accuracy: 0.9421  
Epoch 849/1000  
145/145 [=====] - 1s 5ms/step - loss: 0.0739 -  
accuracy: 0.9724 - val\_loss: 0.2099 - val\_accuracy: 0.9394  
Epoch 850/1000  
145/145 [=====] - 1s 4ms/step - loss: 0.0753 -  
accuracy: 0.9724 - val\_loss: 0.2083 - val\_accuracy: 0.9366  
Epoch 851/1000  
145/145 [=====] - 1s 4ms/step - loss: 0.0758 -  
accuracy: 0.9703 - val\_loss: 0.1854 - val\_accuracy: 0.9394  
Epoch 852/1000  
145/145 [=====] - 1s 4ms/step - loss: 0.0718 -  
accuracy: 0.9703 - val\_loss: 0.1981 - val\_accuracy: 0.9421  
Epoch 853/1000

145/145 [=====] - 1s 4ms/step - loss: 0.0748 -  
accuracy: 0.9710 - val\_loss: 0.1949 - val\_accuracy: 0.9449  
Epoch 854/1000  
145/145 [=====] - 1s 4ms/step - loss: 0.0723 -  
accuracy: 0.9724 - val\_loss: 0.1880 - val\_accuracy: 0.9421  
Epoch 855/1000  
145/145 [=====] - 1s 5ms/step - loss: 0.0706 -  
accuracy: 0.9731 - val\_loss: 0.2300 - val\_accuracy: 0.9394  
Epoch 856/1000  
145/145 [=====] - 1s 5ms/step - loss: 0.0747 -  
accuracy: 0.9696 - val\_loss: 0.2132 - val\_accuracy: 0.9449  
Epoch 857/1000  
145/145 [=====] - 1s 4ms/step - loss: 0.0729 -  
accuracy: 0.9717 - val\_loss: 0.1983 - val\_accuracy: 0.9449  
Epoch 858/1000  
145/145 [=====] - 1s 4ms/step - loss: 0.0724 -  
accuracy: 0.9731 - val\_loss: 0.1864 - val\_accuracy: 0.9421  
Epoch 859/1000  
145/145 [=====] - 1s 5ms/step - loss: 0.0735 -  
accuracy: 0.9717 - val\_loss: 0.1993 - val\_accuracy: 0.9421  
Epoch 860/1000  
145/145 [=====] - 1s 4ms/step - loss: 0.0728 -  
accuracy: 0.9731 - val\_loss: 0.2039 - val\_accuracy: 0.9449  
Epoch 861/1000  
145/145 [=====] - 1s 4ms/step - loss: 0.0736 -  
accuracy: 0.9689 - val\_loss: 0.1857 - val\_accuracy: 0.9421  
Epoch 862/1000  
145/145 [=====] - 1s 4ms/step - loss: 0.0739 -  
accuracy: 0.9738 - val\_loss: 0.1909 - val\_accuracy: 0.9394  
Epoch 863/1000  
145/145 [=====] - 1s 4ms/step - loss: 0.0743 -  
accuracy: 0.9703 - val\_loss: 0.1943 - val\_accuracy: 0.9449  
Epoch 864/1000  
145/145 [=====] - 1s 4ms/step - loss: 0.0753 -  
accuracy: 0.9717 - val\_loss: 0.2133 - val\_accuracy: 0.9421  
Epoch 865/1000  
145/145 [=====] - 1s 4ms/step - loss: 0.0759 -  
accuracy: 0.9696 - val\_loss: 0.2141 - val\_accuracy: 0.9449  
Epoch 866/1000  
145/145 [=====] - 1s 4ms/step - loss: 0.0753 -  
accuracy: 0.9703 - val\_loss: 0.2034 - val\_accuracy: 0.9421  
Epoch 867/1000  
145/145 [=====] - 1s 4ms/step - loss: 0.0714 -  
accuracy: 0.9724 - val\_loss: 0.1974 - val\_accuracy: 0.9449  
Epoch 868/1000  
145/145 [=====] - 1s 4ms/step - loss: 0.0734 -  
accuracy: 0.9724 - val\_loss: 0.2205 - val\_accuracy: 0.9394  
Epoch 869/1000

145/145 [=====] - 1s 5ms/step - loss: 0.0741 -  
accuracy: 0.9703 - val\_loss: 0.2141 - val\_accuracy: 0.9449  
Epoch 870/1000  
145/145 [=====] - 1s 5ms/step - loss: 0.0734 -  
accuracy: 0.9731 - val\_loss: 0.1899 - val\_accuracy: 0.9421  
Epoch 871/1000  
145/145 [=====] - 1s 5ms/step - loss: 0.0734 -  
accuracy: 0.9724 - val\_loss: 0.2175 - val\_accuracy: 0.9394  
Epoch 872/1000  
145/145 [=====] - 1s 5ms/step - loss: 0.0732 -  
accuracy: 0.9738 - val\_loss: 0.1856 - val\_accuracy: 0.9449  
Epoch 873/1000  
145/145 [=====] - 1s 5ms/step - loss: 0.0715 -  
accuracy: 0.9710 - val\_loss: 0.2063 - val\_accuracy: 0.9339  
Epoch 874/1000  
145/145 [=====] - 1s 4ms/step - loss: 0.0740 -  
accuracy: 0.9724 - val\_loss: 0.2095 - val\_accuracy: 0.9449  
Epoch 875/1000  
145/145 [=====] - 1s 4ms/step - loss: 0.0743 -  
accuracy: 0.9710 - val\_loss: 0.1961 - val\_accuracy: 0.9339  
Epoch 876/1000  
145/145 [=====] - 1s 5ms/step - loss: 0.0739 -  
accuracy: 0.9703 - val\_loss: 0.2110 - val\_accuracy: 0.9421  
Epoch 877/1000  
145/145 [=====] - 1s 4ms/step - loss: 0.0744 -  
accuracy: 0.9717 - val\_loss: 0.2144 - val\_accuracy: 0.9421  
Epoch 878/1000  
145/145 [=====] - 1s 4ms/step - loss: 0.0741 -  
accuracy: 0.9724 - val\_loss: 0.2036 - val\_accuracy: 0.9449  
Epoch 879/1000  
145/145 [=====] - 1s 4ms/step - loss: 0.0756 -  
accuracy: 0.9724 - val\_loss: 0.1884 - val\_accuracy: 0.9366  
Epoch 880/1000  
145/145 [=====] - 1s 4ms/step - loss: 0.0753 -  
accuracy: 0.9710 - val\_loss: 0.1993 - val\_accuracy: 0.9421  
Epoch 881/1000  
145/145 [=====] - 1s 4ms/step - loss: 0.0730 -  
accuracy: 0.9738 - val\_loss: 0.1866 - val\_accuracy: 0.9421  
Epoch 882/1000  
145/145 [=====] - 1s 4ms/step - loss: 0.0729 -  
accuracy: 0.9724 - val\_loss: 0.1855 - val\_accuracy: 0.9449  
Epoch 883/1000  
145/145 [=====] - 1s 4ms/step - loss: 0.0722 -  
accuracy: 0.9717 - val\_loss: 0.2174 - val\_accuracy: 0.9394  
Epoch 884/1000  
145/145 [=====] - 1s 4ms/step - loss: 0.0730 -  
accuracy: 0.9717 - val\_loss: 0.1902 - val\_accuracy: 0.9449  
Epoch 885/1000

145/145 [=====] - 1s 5ms/step - loss: 0.0723 -  
accuracy: 0.9738 - val\_loss: 0.1891 - val\_accuracy: 0.9366  
Epoch 886/1000  
145/145 [=====] - 1s 4ms/step - loss: 0.0743 -  
accuracy: 0.9710 - val\_loss: 0.2073 - val\_accuracy: 0.9449  
Epoch 887/1000  
145/145 [=====] - 1s 5ms/step - loss: 0.0731 -  
accuracy: 0.9731 - val\_loss: 0.2075 - val\_accuracy: 0.9394  
Epoch 888/1000  
145/145 [=====] - 1s 5ms/step - loss: 0.0721 -  
accuracy: 0.9703 - val\_loss: 0.2242 - val\_accuracy: 0.9394  
Epoch 889/1000  
145/145 [=====] - 1s 4ms/step - loss: 0.0711 -  
accuracy: 0.9717 - val\_loss: 0.1759 - val\_accuracy: 0.9421  
Epoch 890/1000  
145/145 [=====] - 1s 4ms/step - loss: 0.0757 -  
accuracy: 0.9710 - val\_loss: 0.1983 - val\_accuracy: 0.9421  
Epoch 891/1000  
145/145 [=====] - 1s 5ms/step - loss: 0.0725 -  
accuracy: 0.9738 - val\_loss: 0.1941 - val\_accuracy: 0.9449  
Epoch 892/1000  
145/145 [=====] - 1s 4ms/step - loss: 0.0759 -  
accuracy: 0.9731 - val\_loss: 0.2019 - val\_accuracy: 0.9449  
Epoch 893/1000  
145/145 [=====] - 1s 4ms/step - loss: 0.0733 -  
accuracy: 0.9717 - val\_loss: 0.1947 - val\_accuracy: 0.9394  
Epoch 894/1000  
145/145 [=====] - 1s 4ms/step - loss: 0.0728 -  
accuracy: 0.9724 - val\_loss: 0.2194 - val\_accuracy: 0.9449  
Epoch 895/1000  
145/145 [=====] - 1s 4ms/step - loss: 0.0756 -  
accuracy: 0.9696 - val\_loss: 0.2018 - val\_accuracy: 0.9421  
Epoch 896/1000  
145/145 [=====] - 1s 5ms/step - loss: 0.0738 -  
accuracy: 0.9696 - val\_loss: 0.2012 - val\_accuracy: 0.9394  
Epoch 897/1000  
145/145 [=====] - 1s 5ms/step - loss: 0.0732 -  
accuracy: 0.9731 - val\_loss: 0.1989 - val\_accuracy: 0.9394  
Epoch 898/1000  
145/145 [=====] - 1s 4ms/step - loss: 0.0727 -  
accuracy: 0.9724 - val\_loss: 0.2241 - val\_accuracy: 0.9449  
Epoch 899/1000  
145/145 [=====] - 1s 4ms/step - loss: 0.0730 -  
accuracy: 0.9731 - val\_loss: 0.2004 - val\_accuracy: 0.9421  
Epoch 900/1000  
145/145 [=====] - 1s 5ms/step - loss: 0.0744 -  
accuracy: 0.9689 - val\_loss: 0.2083 - val\_accuracy: 0.9449  
Epoch 901/1000



145/145 [=====] - 1s 4ms/step - loss: 0.0745 -  
accuracy: 0.9717 - val\_loss: 0.2093 - val\_accuracy: 0.9449  
Epoch 902/1000  
145/145 [=====] - 1s 4ms/step - loss: 0.0757 -  
accuracy: 0.9710 - val\_loss: 0.2285 - val\_accuracy: 0.9449  
Epoch 903/1000  
145/145 [=====] - 1s 4ms/step - loss: 0.0753 -  
accuracy: 0.9717 - val\_loss: 0.2169 - val\_accuracy: 0.9449  
Epoch 904/1000  
145/145 [=====] - 1s 4ms/step - loss: 0.0730 -  
accuracy: 0.9724 - val\_loss: 0.2053 - val\_accuracy: 0.9449  
Epoch 905/1000  
145/145 [=====] - 1s 5ms/step - loss: 0.0726 -  
accuracy: 0.9717 - val\_loss: 0.2346 - val\_accuracy: 0.9449  
Epoch 906/1000  
145/145 [=====] - 1s 4ms/step - loss: 0.0735 -  
accuracy: 0.9717 - val\_loss: 0.2118 - val\_accuracy: 0.9449  
Epoch 907/1000  
145/145 [=====] - 1s 5ms/step - loss: 0.0725 -  
accuracy: 0.9717 - val\_loss: 0.2151 - val\_accuracy: 0.9394  
Epoch 908/1000  
145/145 [=====] - 1s 4ms/step - loss: 0.0720 -  
accuracy: 0.9717 - val\_loss: 0.2067 - val\_accuracy: 0.9449  
Epoch 909/1000  
145/145 [=====] - 1s 4ms/step - loss: 0.0742 -  
accuracy: 0.9717 - val\_loss: 0.1905 - val\_accuracy: 0.9394  
Epoch 910/1000  
145/145 [=====] - 1s 5ms/step - loss: 0.0705 -  
accuracy: 0.9717 - val\_loss: 0.2298 - val\_accuracy: 0.9394  
Epoch 911/1000  
145/145 [=====] - 1s 4ms/step - loss: 0.0731 -  
accuracy: 0.9696 - val\_loss: 0.2160 - val\_accuracy: 0.9394  
Epoch 912/1000  
145/145 [=====] - 1s 4ms/step - loss: 0.0756 -  
accuracy: 0.9703 - val\_loss: 0.1994 - val\_accuracy: 0.9449  
Epoch 913/1000  
145/145 [=====] - 1s 5ms/step - loss: 0.0742 -  
accuracy: 0.9717 - val\_loss: 0.2050 - val\_accuracy: 0.9366  
Epoch 914/1000  
145/145 [=====] - 1s 5ms/step - loss: 0.0745 -  
accuracy: 0.9724 - val\_loss: 0.2474 - val\_accuracy: 0.9449  
Epoch 915/1000  
145/145 [=====] - 1s 4ms/step - loss: 0.0723 -  
accuracy: 0.9724 - val\_loss: 0.2224 - val\_accuracy: 0.9421  
Epoch 916/1000  
145/145 [=====] - 1s 4ms/step - loss: 0.0739 -  
accuracy: 0.9717 - val\_loss: 0.2126 - val\_accuracy: 0.9449  
Epoch 917/1000

145/145 [=====] - 1s 4ms/step - loss: 0.0750 -  
accuracy: 0.9724 - val\_loss: 0.2083 - val\_accuracy: 0.9421  
Epoch 918/1000  
145/145 [=====] - 1s 5ms/step - loss: 0.0707 -  
accuracy: 0.9710 - val\_loss: 0.2319 - val\_accuracy: 0.9421  
Epoch 919/1000  
145/145 [=====] - 1s 5ms/step - loss: 0.0739 -  
accuracy: 0.9724 - val\_loss: 0.2234 - val\_accuracy: 0.9449  
Epoch 920/1000  
145/145 [=====] - 1s 4ms/step - loss: 0.0710 -  
accuracy: 0.9703 - val\_loss: 0.2031 - val\_accuracy: 0.9449  
Epoch 921/1000  
145/145 [=====] - 1s 5ms/step - loss: 0.0716 -  
accuracy: 0.9696 - val\_loss: 0.2171 - val\_accuracy: 0.9449  
Epoch 922/1000  
145/145 [=====] - 1s 4ms/step - loss: 0.0711 -  
accuracy: 0.9724 - val\_loss: 0.1964 - val\_accuracy: 0.9421  
Epoch 923/1000  
145/145 [=====] - 1s 4ms/step - loss: 0.0733 -  
accuracy: 0.9703 - val\_loss: 0.2278 - val\_accuracy: 0.9449  
Epoch 924/1000  
145/145 [=====] - 1s 4ms/step - loss: 0.0724 -  
accuracy: 0.9731 - val\_loss: 0.1964 - val\_accuracy: 0.9394  
Epoch 925/1000  
145/145 [=====] - 1s 4ms/step - loss: 0.0751 -  
accuracy: 0.9676 - val\_loss: 0.2231 - val\_accuracy: 0.9394  
Epoch 926/1000  
145/145 [=====] - 1s 5ms/step - loss: 0.0706 -  
accuracy: 0.9752 - val\_loss: 0.2137 - val\_accuracy: 0.9394  
Epoch 927/1000  
145/145 [=====] - 1s 5ms/step - loss: 0.0743 -  
accuracy: 0.9724 - val\_loss: 0.2192 - val\_accuracy: 0.9449  
Epoch 928/1000  
145/145 [=====] - 1s 5ms/step - loss: 0.0710 -  
accuracy: 0.9724 - val\_loss: 0.2063 - val\_accuracy: 0.9449  
Epoch 929/1000  
145/145 [=====] - 1s 4ms/step - loss: 0.0730 -  
accuracy: 0.9703 - val\_loss: 0.2091 - val\_accuracy: 0.9421  
Epoch 930/1000  
145/145 [=====] - 1s 5ms/step - loss: 0.0724 -  
accuracy: 0.9731 - val\_loss: 0.1948 - val\_accuracy: 0.9421  
Epoch 931/1000  
145/145 [=====] - 1s 4ms/step - loss: 0.0725 -  
accuracy: 0.9710 - val\_loss: 0.2085 - val\_accuracy: 0.9421  
Epoch 932/1000  
145/145 [=====] - 1s 4ms/step - loss: 0.0716 -  
accuracy: 0.9724 - val\_loss: 0.2111 - val\_accuracy: 0.9366  
Epoch 933/1000

145/145 [=====] - 1s 4ms/step - loss: 0.0724 -  
accuracy: 0.9731 - val\_loss: 0.2191 - val\_accuracy: 0.9449  
Epoch 934/1000  
145/145 [=====] - 1s 4ms/step - loss: 0.0712 -  
accuracy: 0.9731 - val\_loss: 0.1991 - val\_accuracy: 0.9394  
Epoch 935/1000  
145/145 [=====] - 1s 5ms/step - loss: 0.0712 -  
accuracy: 0.9738 - val\_loss: 0.2053 - val\_accuracy: 0.9366  
Epoch 936/1000  
145/145 [=====] - 1s 4ms/step - loss: 0.0754 -  
accuracy: 0.9710 - val\_loss: 0.2013 - val\_accuracy: 0.9421  
Epoch 937/1000  
145/145 [=====] - 1s 4ms/step - loss: 0.0734 -  
accuracy: 0.9717 - val\_loss: 0.2122 - val\_accuracy: 0.9394  
Epoch 938/1000  
145/145 [=====] - 1s 4ms/step - loss: 0.0722 -  
accuracy: 0.9731 - val\_loss: 0.2146 - val\_accuracy: 0.9449  
Epoch 939/1000  
145/145 [=====] - 1s 4ms/step - loss: 0.0733 -  
accuracy: 0.9724 - val\_loss: 0.2234 - val\_accuracy: 0.9449  
Epoch 940/1000  
145/145 [=====] - 1s 4ms/step - loss: 0.0714 -  
accuracy: 0.9717 - val\_loss: 0.2024 - val\_accuracy: 0.9366  
Epoch 941/1000  
145/145 [=====] - 1s 4ms/step - loss: 0.0707 -  
accuracy: 0.9717 - val\_loss: 0.1909 - val\_accuracy: 0.9421  
Epoch 942/1000  
145/145 [=====] - 1s 4ms/step - loss: 0.0727 -  
accuracy: 0.9724 - val\_loss: 0.2113 - val\_accuracy: 0.9421  
Epoch 943/1000  
145/145 [=====] - 1s 5ms/step - loss: 0.0727 -  
accuracy: 0.9724 - val\_loss: 0.2077 - val\_accuracy: 0.9421  
Epoch 944/1000  
145/145 [=====] - 1s 4ms/step - loss: 0.0715 -  
accuracy: 0.9703 - val\_loss: 0.2024 - val\_accuracy: 0.9421  
Epoch 945/1000  
145/145 [=====] - 1s 4ms/step - loss: 0.0731 -  
accuracy: 0.9717 - val\_loss: 0.2127 - val\_accuracy: 0.9394  
Epoch 946/1000  
145/145 [=====] - 1s 5ms/step - loss: 0.0741 -  
accuracy: 0.9696 - val\_loss: 0.2073 - val\_accuracy: 0.9421  
Epoch 947/1000  
145/145 [=====] - 1s 4ms/step - loss: 0.0739 -  
accuracy: 0.9717 - val\_loss: 0.1971 - val\_accuracy: 0.9449  
Epoch 948/1000  
145/145 [=====] - 1s 4ms/step - loss: 0.0722 -  
accuracy: 0.9738 - val\_loss: 0.2029 - val\_accuracy: 0.9421  
Epoch 949/1000

145/145 [=====] - 1s 4ms/step - loss: 0.0719 -  
accuracy: 0.9738 - val\_loss: 0.2014 - val\_accuracy: 0.9394  
Epoch 950/1000  
145/145 [=====] - 1s 5ms/step - loss: 0.0745 -  
accuracy: 0.9717 - val\_loss: 0.1884 - val\_accuracy: 0.9449  
Epoch 951/1000  
145/145 [=====] - 1s 4ms/step - loss: 0.0733 -  
accuracy: 0.9703 - val\_loss: 0.2015 - val\_accuracy: 0.9421  
Epoch 952/1000  
145/145 [=====] - 1s 4ms/step - loss: 0.0706 -  
accuracy: 0.9724 - val\_loss: 0.1735 - val\_accuracy: 0.9311  
Epoch 953/1000  
145/145 [=====] - 1s 4ms/step - loss: 0.0764 -  
accuracy: 0.9696 - val\_loss: 0.1773 - val\_accuracy: 0.9421  
Epoch 954/1000  
145/145 [=====] - 1s 5ms/step - loss: 0.0726 -  
accuracy: 0.9724 - val\_loss: 0.2048 - val\_accuracy: 0.9421  
Epoch 955/1000  
145/145 [=====] - 1s 5ms/step - loss: 0.0710 -  
accuracy: 0.9738 - val\_loss: 0.1977 - val\_accuracy: 0.9421  
Epoch 956/1000  
145/145 [=====] - 1s 5ms/step - loss: 0.0736 -  
accuracy: 0.9731 - val\_loss: 0.2302 - val\_accuracy: 0.9394  
Epoch 957/1000  
145/145 [=====] - 1s 4ms/step - loss: 0.0730 -  
accuracy: 0.9717 - val\_loss: 0.1904 - val\_accuracy: 0.9284  
Epoch 958/1000  
145/145 [=====] - 1s 4ms/step - loss: 0.0752 -  
accuracy: 0.9724 - val\_loss: 0.2193 - val\_accuracy: 0.9449  
Epoch 959/1000  
145/145 [=====] - 1s 4ms/step - loss: 0.0736 -  
accuracy: 0.9710 - val\_loss: 0.1874 - val\_accuracy: 0.9421  
Epoch 960/1000  
145/145 [=====] - 1s 4ms/step - loss: 0.0715 -  
accuracy: 0.9710 - val\_loss: 0.1900 - val\_accuracy: 0.9421  
Epoch 961/1000  
145/145 [=====] - 1s 5ms/step - loss: 0.0714 -  
accuracy: 0.9731 - val\_loss: 0.2183 - val\_accuracy: 0.9449  
Epoch 962/1000  
145/145 [=====] - 1s 4ms/step - loss: 0.0714 -  
accuracy: 0.9724 - val\_loss: 0.2100 - val\_accuracy: 0.9421  
Epoch 963/1000  
145/145 [=====] - 1s 5ms/step - loss: 0.0707 -  
accuracy: 0.9731 - val\_loss: 0.2159 - val\_accuracy: 0.9394  
Epoch 964/1000  
145/145 [=====] - 1s 4ms/step - loss: 0.0729 -  
accuracy: 0.9717 - val\_loss: 0.2010 - val\_accuracy: 0.9421  
Epoch 965/1000

145/145 [=====] - 1s 4ms/step - loss: 0.0721 -  
accuracy: 0.9738 - val\_loss: 0.1772 - val\_accuracy: 0.9421  
Epoch 966/1000  
145/145 [=====] - 1s 5ms/step - loss: 0.0705 -  
accuracy: 0.9731 - val\_loss: 0.1844 - val\_accuracy: 0.9339  
Epoch 967/1000  
145/145 [=====] - 1s 4ms/step - loss: 0.0733 -  
accuracy: 0.9717 - val\_loss: 0.2067 - val\_accuracy: 0.9366  
Epoch 968/1000  
145/145 [=====] - 1s 5ms/step - loss: 0.0734 -  
accuracy: 0.9710 - val\_loss: 0.1916 - val\_accuracy: 0.9394  
Epoch 969/1000  
145/145 [=====] - 1s 5ms/step - loss: 0.0729 -  
accuracy: 0.9717 - val\_loss: 0.2024 - val\_accuracy: 0.9449  
Epoch 970/1000  
145/145 [=====] - 1s 4ms/step - loss: 0.0728 -  
accuracy: 0.9738 - val\_loss: 0.2272 - val\_accuracy: 0.9449  
Epoch 971/1000  
145/145 [=====] - 1s 5ms/step - loss: 0.0740 -  
accuracy: 0.9703 - val\_loss: 0.2297 - val\_accuracy: 0.9449  
Epoch 972/1000  
145/145 [=====] - 1s 5ms/step - loss: 0.0714 -  
accuracy: 0.9717 - val\_loss: 0.1915 - val\_accuracy: 0.9449  
Epoch 973/1000  
145/145 [=====] - 1s 5ms/step - loss: 0.0726 -  
accuracy: 0.9738 - val\_loss: 0.1860 - val\_accuracy: 0.9366  
Epoch 974/1000  
145/145 [=====] - 1s 4ms/step - loss: 0.0735 -  
accuracy: 0.9703 - val\_loss: 0.1846 - val\_accuracy: 0.9421  
Epoch 975/1000  
145/145 [=====] - 1s 5ms/step - loss: 0.0704 -  
accuracy: 0.9724 - val\_loss: 0.2020 - val\_accuracy: 0.9449  
Epoch 976/1000  
145/145 [=====] - 1s 4ms/step - loss: 0.0725 -  
accuracy: 0.9717 - val\_loss: 0.1731 - val\_accuracy: 0.9394  
Epoch 977/1000  
145/145 [=====] - 1s 5ms/step - loss: 0.0709 -  
accuracy: 0.9717 - val\_loss: 0.1810 - val\_accuracy: 0.9421  
Epoch 978/1000  
145/145 [=====] - 1s 4ms/step - loss: 0.0731 -  
accuracy: 0.9717 - val\_loss: 0.1868 - val\_accuracy: 0.9421  
Epoch 979/1000  
145/145 [=====] - 1s 4ms/step - loss: 0.0732 -  
accuracy: 0.9731 - val\_loss: 0.2065 - val\_accuracy: 0.9421  
Epoch 980/1000  
145/145 [=====] - 1s 4ms/step - loss: 0.0734 -  
accuracy: 0.9696 - val\_loss: 0.2120 - val\_accuracy: 0.9421  
Epoch 981/1000

145/145 [=====] - 1s 4ms/step - loss: 0.0715 -  
accuracy: 0.9724 - val\_loss: 0.2025 - val\_accuracy: 0.9449  
Epoch 982/1000  
145/145 [=====] - 1s 4ms/step - loss: 0.0706 -  
accuracy: 0.9738 - val\_loss: 0.1899 - val\_accuracy: 0.9394  
Epoch 983/1000  
145/145 [=====] - 1s 5ms/step - loss: 0.0730 -  
accuracy: 0.9738 - val\_loss: 0.2010 - val\_accuracy: 0.9421  
Epoch 984/1000  
145/145 [=====] - 1s 4ms/step - loss: 0.0711 -  
accuracy: 0.9724 - val\_loss: 0.1970 - val\_accuracy: 0.9449  
Epoch 985/1000  
145/145 [=====] - 1s 5ms/step - loss: 0.0719 -  
accuracy: 0.9724 - val\_loss: 0.2097 - val\_accuracy: 0.9449  
Epoch 986/1000  
145/145 [=====] - 1s 4ms/step - loss: 0.0732 -  
accuracy: 0.9717 - val\_loss: 0.1956 - val\_accuracy: 0.9421  
Epoch 987/1000  
145/145 [=====] - 1s 4ms/step - loss: 0.0732 -  
accuracy: 0.9717 - val\_loss: 0.2148 - val\_accuracy: 0.9421  
Epoch 988/1000  
145/145 [=====] - 1s 4ms/step - loss: 0.0715 -  
accuracy: 0.9745 - val\_loss: 0.2043 - val\_accuracy: 0.9449  
Epoch 989/1000  
145/145 [=====] - 1s 5ms/step - loss: 0.0722 -  
accuracy: 0.9731 - val\_loss: 0.2061 - val\_accuracy: 0.9394  
Epoch 990/1000  
145/145 [=====] - 1s 5ms/step - loss: 0.0722 -  
accuracy: 0.9683 - val\_loss: 0.2000 - val\_accuracy: 0.9421  
Epoch 991/1000  
145/145 [=====] - 1s 4ms/step - loss: 0.0726 -  
accuracy: 0.9731 - val\_loss: 0.2302 - val\_accuracy: 0.9449  
Epoch 992/1000  
145/145 [=====] - 1s 4ms/step - loss: 0.0721 -  
accuracy: 0.9724 - val\_loss: 0.1992 - val\_accuracy: 0.9421  
Epoch 993/1000  
145/145 [=====] - 1s 4ms/step - loss: 0.0719 -  
accuracy: 0.9710 - val\_loss: 0.1982 - val\_accuracy: 0.9421  
Epoch 994/1000  
145/145 [=====] - 1s 4ms/step - loss: 0.0719 -  
accuracy: 0.9724 - val\_loss: 0.1931 - val\_accuracy: 0.9449  
Epoch 995/1000  
145/145 [=====] - 1s 4ms/step - loss: 0.0711 -  
accuracy: 0.9710 - val\_loss: 0.2050 - val\_accuracy: 0.9449  
Epoch 996/1000  
145/145 [=====] - 1s 5ms/step - loss: 0.0727 -  
accuracy: 0.9717 - val\_loss: 0.2010 - val\_accuracy: 0.9449  
Epoch 997/1000

```

145/145 [=====] - 1s 5ms/step - loss: 0.0749 -
accuracy: 0.9710 - val_loss: 0.2102 - val_accuracy: 0.9449
Epoch 998/1000
145/145 [=====] - 1s 5ms/step - loss: 0.0722 -
accuracy: 0.9703 - val_loss: 0.2035 - val_accuracy: 0.9421
Epoch 999/1000
145/145 [=====] - 1s 4ms/step - loss: 0.0708 -
accuracy: 0.9724 - val_loss: 0.1972 - val_accuracy: 0.9449
Epoch 1000/1000
145/145 [=====] - 1s 4ms/step - loss: 0.0726 -
accuracy: 0.9710 - val_loss: 0.1786 - val_accuracy: 0.9339

```

```

[45]: from matplotlib import pyplot as plt
      history_dict = history.history

      # learning curve
      # accuracy
      acc = history_dict['accuracy']
      val_acc = history_dict['val_accuracy']

      # loss
      loss = history_dict['loss']
      val_loss = history_dict['val_loss']

      # range of X (no. of epochs)
      epochs = range(1, len(acc) + 1)

      #plt.set_figheight(6)
      #plt.set_figwidth(9)
      plt.grid(True)

      # plot
      # "r" is for "solid red line"
      plt.plot(epochs, acc, 'r', label='Training accuracy')
      # b is for "solid blue line"
      plt.plot(epochs, val_acc, 'b', label='Validation accuracy')
      plt.title('Training and validation accuracy')
      plt.xlabel('Epochs')
      plt.ylabel('Accuracy')

      #plt.legend()

      plt.legend(loc="lower right",prop=dict(size=11))
      #plt.savefig('ROC_4.pdf', dpi=600)

      plt.savefig('accuracy.pdf', dpi=600)

```

```
plt.show()
```

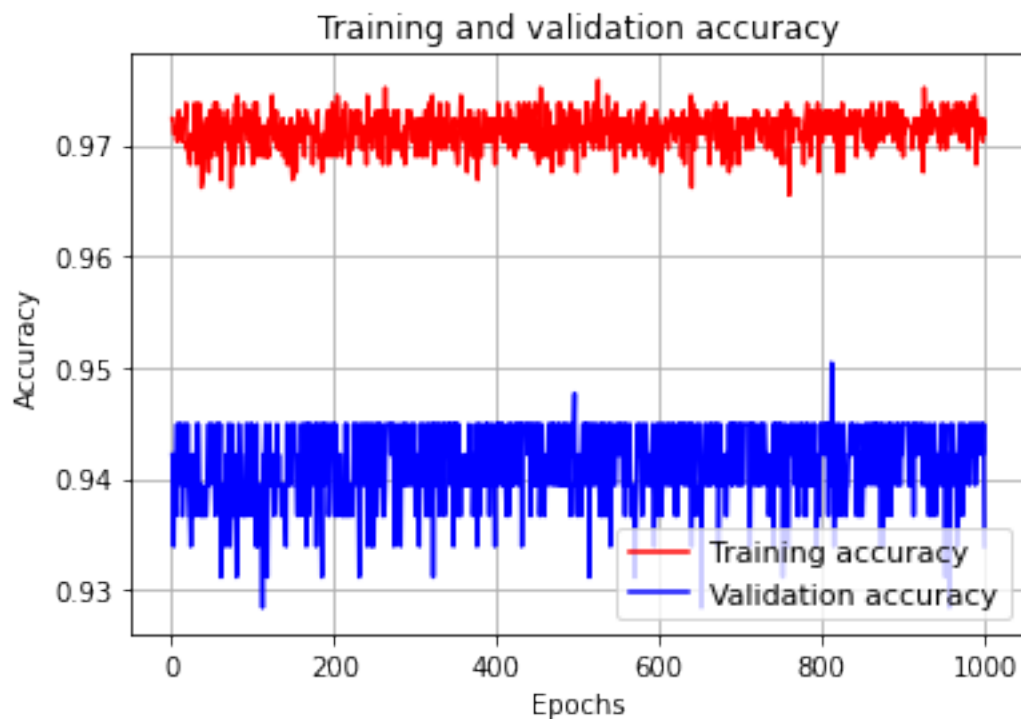

```
[57]: from sklearn.metrics import confusion_matrix
from sklearn.metrics import classification_report

print("##### Confusion Martix Training Set #####")

preds = model.predict(X_train)
print(preds[0])
print(np.sum(preds[0]))
matrix = confusion_matrix(dummy_y_train.argmax(axis=1), preds.argmax(axis=1))
matrix
print(classification_report(dummy_y_train.argmax(axis=1), preds.argmax(axis=1)))
matrix
```

```
##### Confusion Martix Training Set #####
57/57 [=====] - 0s 2ms/step
[7.2210831e-05 3.2135600e-03 3.5841504e-07 9.9671388e-01 4.7643413e-12
 6.7396009e-09]
1.0
      precision    recall  f1-score   support

0         0.99         0.85         0.92         302
```



|              |      |      |      |      |
|--------------|------|------|------|------|
| 1            | 0.88 | 0.97 | 0.92 | 302  |
| 2            | 0.98 | 0.97 | 0.97 | 302  |
| 3            | 0.96 | 1.00 | 0.98 | 302  |
| 4            | 0.99 | 1.00 | 1.00 | 302  |
| 5            | 1.00 | 0.99 | 1.00 | 302  |
| accuracy     |      |      | 0.96 | 1812 |
| macro avg    | 0.97 | 0.96 | 0.96 | 1812 |
| weighted avg | 0.97 | 0.96 | 0.96 | 1812 |

```
[57]: array([[258, 32, 6, 4, 2, 0],
             [ 0, 293, 0, 9, 0, 0],
             [ 0, 9, 293, 0, 0, 0],
             [ 0, 0, 0, 302, 0, 0],
             [ 0, 0, 0, 0, 302, 0],
             [ 2, 0, 1, 0, 0, 299]])
```

```
[58]: print("##### Confusion Martix Training Set #####")
print(classification_report(dummy_y_train.argmax(axis=1), preds.argmax(axis=1)))
matrix
```

```
##### Confusion Martix Training Set #####
              precision    recall  f1-score   support

0           0.99         0.85         0.92         302
1           0.88         0.97         0.92         302
2           0.98         0.97         0.97         302
3           0.96         1.00         0.98         302
4           0.99         1.00         1.00         302
5           1.00         0.99         1.00         302

accuracy                0.96         1812
macro avg              0.97         0.96         0.96         1812
weighted avg          0.97         0.96         0.96         1812
```

```
[58]: array([[258, 32, 6, 4, 2, 0],
             [ 0, 293, 0, 9, 0, 0],
             [ 0, 9, 293, 0, 0, 0],
             [ 0, 0, 0, 302, 0, 0],
             [ 0, 0, 0, 0, 302, 0],
             [ 2, 0, 1, 0, 0, 299]])
```

```
[59]: from sklearn.metrics import confusion_matrix
from sklearn.metrics import classification_report

print("##### Confusion Martix Validation Set #####")
```

```

preds = model.predict(X_validate) # see how the model did!
print(preds[0])
print(np.sum(preds[0]))
matrix = confusion_matrix(dummy_y_validate.argmax(axis=1), preds.argmax(axis=1))
matrix
print(classification_report(dummy_y_validate.argmax(axis=1), preds.
    ↪argmax(axis=1)))
print("Confusion Martix Validation Set")
matrix

```

```

##### Confusion Martix Validation Set #####
2/2 [=====] - 0s 5ms/step
[2.1934321e-02 9.6082646e-01 1.7173499e-02 6.5686087e-05 8.8796820e-17
 5.6037817e-11]

```

```

1.0

```

|              | precision | recall | f1-score | support |
|--------------|-----------|--------|----------|---------|
| 0            | 1.00      | 0.93   | 0.97     | 15      |
| 1            | 0.88      | 1.00   | 0.93     | 7       |
| 2            | 1.00      | 1.00   | 1.00     | 3       |
| 3            | 1.00      | 1.00   | 1.00     | 2       |
| 4            | 1.00      | 1.00   | 1.00     | 1       |
| 5            | 1.00      | 1.00   | 1.00     | 30      |
| accuracy     |           |        | 0.98     | 58      |
| macro avg    | 0.98      | 0.99   | 0.98     | 58      |
| weighted avg | 0.98      | 0.98   | 0.98     | 58      |

Confusion Martix Validation Set

```

[59]: array([[14,  1,  0,  0,  0,  0],
            [ 0,  7,  0,  0,  0,  0],
            [ 0,  0,  3,  0,  0,  0],
            [ 0,  0,  0,  2,  0,  0],
            [ 0,  0,  0,  0,  1,  0],
            [ 0,  0,  0,  0,  0, 30]])

```

```

[60]: from sklearn.metrics import confusion_matrix
      from sklearn.metrics import classification_report

      print("##### Confusion Martix Test Set #####")

      preds = model.predict(X_test) # see how the model did!
      print(preds[0])
      print(np.sum(preds[0]))
      matrix = confusion_matrix(dummy_y_test.argmax(axis=1), preds.argmax(axis=1))
      matrix
      print(classification_report(dummy_y_test.argmax(axis=1), preds.argmax(axis=1)))

```

```
matrix
```

```
##### Confusion Martix Test Set #####  
4/4 [=====] - 0s 2ms/step  
[2.6484286e-09 5.1621100e-06 2.1403983e-09 9.9999487e-01 5.4475127e-29  
1.5168123e-12]  
1.0  
      precision    recall  f1-score   support  
  
 0         1.00      0.90      0.95         31  
 1         0.86      0.92      0.89         13  
 2         0.88      1.00      0.93          7  
 3         0.80      1.00      0.89          4  
 4         1.00      1.00      1.00          1  
 5         1.00      1.00      1.00         60  
  
 accuracy                0.97         116  
 macro avg              0.92      0.97         116  
 weighted avg          0.97      0.97         116
```

```
[60]: array([[28,  2,  1,  0,  0,  0],  
            [ 0, 12,  0,  1,  0,  0],  
            [ 0,  0,  7,  0,  0,  0],  
            [ 0,  0,  0,  4,  0,  0],  
            [ 0,  0,  0,  0,  1,  0],  
            [ 0,  0,  0,  0,  0, 60]])
```
