# Supplementary material for: Survival estimation of oral cancer using fuzzy deep learning
Source: Springer Nature journal article supplement (doi:10.1186/s12903-024-04279-6), 2024-05-02
Supplement: MOESM2 [file 27046996]

# FuzzyDeepLearningOralCancer\_RF

April 17, 2024

```
[171]: #Importing Libraries
import numpy as np
import pandas as pd
import joblib
from sklearn.model_selection import train_test_split
from sklearn.preprocessing import StandardScaler
from sklearn.ensemble import RandomForestClassifier
from sklearn.metrics import confusion_matrix

# from sklearn.externals import joblib
print('Libraries Imported')
```

Libraries Imported

```
[172]: dataset = pd.read_csv("Data_RF_SVM/9.Training_oral_cancer.csv", header = None)
dataset.columns =
↳ ['gender', 'age_fuzzy', 'primary_tumor', 'pT_stage', 'pN_stage', 'Staging', 'Patho', 'lymph_metast',
print('Shape of the dataset: ' + str(dataset.shape))
dataset.head()
```

Shape of the dataset: (1253, 14)

```
[172]:
```

|   | gender | age_fuzzy | primary_tumor | pT_stage | pN_stage | Staging | Patho | \ |
|---|--------|-----------|---------------|----------|----------|---------|-------|---|
| 0 | 1      | 3         | 1             | 3        | 3        | 4       | 1     |   |
| 1 | 1      | 2         | 1             | 4        | 1        | 4       | 1     |   |
| 2 | 2      | 6         | 6             | 2        | 3        | 4       | 1     |   |
| 3 | 1      | 3         | 1             | 3        | 6        | 3       | 1     |   |
| 4 | 2      | 5         | 1             | 3        | 6        | 3       | 1     |   |

  

|   | lymph_metastasis | positive_margin | extranodal_extension | vascular_invasion | \ |
|---|------------------|-----------------|----------------------|-------------------|---|
| 0 | 1                | 2               | 2                    | 2                 |   |
| 1 | 1                | 1               | 2                    | 1                 |   |
| 2 | 1                | 2               | 2                    | 2                 |   |
| 3 | 2                | 1               | 2                    | 2                 |   |
| 4 | 2                | 2               | 2                    | 2                 |   |

  

|   | perineural_invasion | five_year_surv | target |
|---|---------------------|----------------|--------|
| 0 | 2                   | 1              | 1      |
| 1 | 1                   | 1              | 1      |

```

2          2          1          1
3          2          1          1
4          2          1          1

```

```

[173]: factor = pd.factorize(dataset['target'])
dataset.target = factor[0]
definitions = factor[1]
print(dataset.target.head())
print(definitions)

```

```

0    0
1    0
2    0
3    0
4    0
Name: target, dtype: int64
Index([1, 2, 3, 4, 5, 6], dtype='int64')

```

```

[174]: X_train = dataset.iloc[:,0:13].values
y_train = dataset.iloc[:,13].values
print('The independent features set: ')
print(X_train[:14,:])
print('The dependent variable: ')
print(y_train[:14])

```

```

The independent features set:
[[1 3 1 3 3 4 1 1 2 2 2 2 1]
 [1 2 1 4 1 4 1 1 1 2 1 1 1]
 [2 6 6 2 3 4 1 1 2 2 2 2 1]
 [1 3 1 3 6 3 1 2 1 2 2 2 1]
 [2 5 1 3 6 3 1 2 2 2 2 2 1]
 [1 4 2 1 6 1 1 2 2 2 2 2 1]
 [1 2 1 2 6 2 1 2 2 2 2 2 1]
 [2 3 1 3 3 4 1 1 2 1 1 1 1]
 [1 3 1 2 3 4 3 1 1 1 1 1 1]
 [2 4 3 4 6 4 1 2 2 2 2 2 1]
 [2 2 1 4 6 4 2 2 2 2 1 2 1]
 [2 4 1 2 3 4 1 1 2 1 2 2 1]
 [1 3 1 2 3 4 1 1 2 1 1 1 1]
 [2 4 1 2 3 4 1 1 2 1 1 2 1]]
The dependent variable:
[0 0 0 0 0 0 0 0 0 0 0 0 0]

```

```

[175]: dataset_test = pd.read_csv("Data_RF_SVM/5.test_oral_cancer.csv", header = None)
dataset_test.columns =
↳ ['gender', 'age_fuzzy', 'primary_tumor', 'pT_stage', 'pN_stage', 'Staging', 'Patho', 'lymph_metast']
print('Shape of the dataset: ' + str(dataset_test.shape))
dataset_test.head()

```

Shape of the dataset: (116, 14)

```
[175]: gender    age_fuzzy    primary_tumor    pT_stage    pN_stage    Staging    Patho  \
0         2         2         4         4         6         4         1
1         1         3         7         3         3         4         2
2         2         3         6         3         6         3         1
3         1         2         7         4         3         4         1
4         1         3         1         3         3         4         2

      lymph_metastasis    positive_margin    extranodal_extension    vascular_invasion  \
0                 2                 1                 1                 1
1                 1                 2                 2                 2
2                 2                 2                 2                 2
3                 1                 1                 2                 2
4                 1                 2                 2                 2

      perineural_invasion    five_year_surv    target
0                 1                 1         1
1                 2                 1         1
2                 2                 1         1
3                 2                 1         1
4                 2                 1         1
```

```
[176]: factor_test = pd.factorize(dataset_test['target'])
dataset_test.target = factor_test[0]
definitions = factor_test[1]
print(dataset_test.target.head())
print(definitions)
```

```
0    0
1    0
2    0
3    0
4    0
Name: target, dtype: int64
Index([1, 2, 3, 4, 5, 6], dtype='int64')
```

```
[177]: X_test = dataset_test.iloc[:,0:13].values
y_test = dataset_test.iloc[:,13].values
print('The independent features set: ')
print(X[:,14,:])
print('The dependent variable: ')
print(y[:,14])
```

```
The independent features set:
[[5.1 3.5 1.4 0.2]
 [4.9 3.  1.4 0.2]
 [4.7 3.2 1.3 0.2]
 [4.6 3.1 1.5 0.2]
```

```

[5.  3.6 1.4 0.2]
[5.4 3.9 1.7 0.4]
[4.6 3.4 1.4 0.3]
[5.  3.4 1.5 0.2]
[4.4 2.9 1.4 0.2]
[4.9 3.1 1.5 0.1]
[5.4 3.7 1.5 0.2]
[4.8 3.4 1.6 0.2]
[4.8 3.  1.4 0.1]
[4.3 3.  1.1 0.1]]

```

The dependent variable:

```

[[1 0 0 0 0 0]
 [1 0 0 0 0 0]
 [1 0 0 0 0 0]
 [1 0 0 0 0 0]
 [1 0 0 0 0 0]
 [1 0 0 0 0 0]
 [1 0 0 0 0 0]
 [1 0 0 0 0 0]
 [1 0 0 0 0 0]
 [1 0 0 0 0 0]
 [1 0 0 0 0 0]
 [1 0 0 0 0 0]
 [1 0 0 0 0 0]
 [1 0 0 0 0 0]
 [1 0 0 0 0 0]
 [1 0 0 0 0 0]]

```

```

[178]: from sklearn.preprocessing import StandardScaler
       scaler = StandardScaler()
       X_train = scaler.fit_transform(X_train)
       X_test = scaler.transform(X_test)

```

```

[179]: classifier = RandomForestClassifier(n_estimators = 10, criterion = 'entropy',
    ↪random_state = 42)
       classifier.fit(X_train, y_train)

```

```

[179]: RandomForestClassifier(criterion='entropy', n_estimators=10, random_state=42)

```

```

[180]: y_pred = classifier.predict(X_test)
       reversefactor = dict(zip(range(6),definitions))
       print(pd.crosstab(y_test, y_pred, rownames=['Actual Species'],
    ↪colnames=['Predicted Species']))

```

| Predicted Species | 0  | 1 | 2 | 3 | 5 |
|-------------------|----|---|---|---|---|
| Actual Species    |    |   |   |   |   |
| 0                 | 21 | 6 | 2 | 2 | 0 |
| 1                 | 9  | 4 | 0 | 0 | 0 |
| 2                 | 6  | 1 | 0 | 0 | 0 |
| 3                 | 1  | 3 | 0 | 0 | 0 |







```
[0, 0, 0, 0, 0, 1],
[0, 0, 0, 0, 0, 1],
[0, 0, 0, 0, 0, 1],
[0, 0, 0, 0, 0, 1],
[0, 0, 0, 0, 0, 1],
[0, 0, 0, 0, 0, 1],
[0, 0, 0, 0, 0, 1],
[0, 0, 0, 0, 0, 1],
[0, 0, 0, 0, 0, 1],
[0, 0, 0, 0, 0, 1],
[0, 0, 0, 0, 0, 1],
[0, 0, 0, 0, 0, 1],
[0, 0, 0, 0, 0, 1],
[0, 0, 0, 0, 0, 1],
[0, 0, 0, 0, 0, 1],
[0, 0, 0, 0, 0, 1]]
```

```
[188]: y_pred = label_binarize(y_pred, classes=[0, 1, 2, 3, 4, 5])
y_score = y_pred
y_score
```

```
[188]: array([[1, 0, 0, 0, 0, 0],
[0, 0, 0, 1, 0, 0],
[1, 0, 0, 0, 0, 0],
[1, 0, 0, 0, 0, 0],
[1, 0, 0, 0, 0, 0],
[1, 0, 0, 0, 0, 0],
[0, 1, 0, 0, 0, 0],
[1, 0, 0, 0, 0, 0],
[1, 0, 0, 0, 0, 0],
[0, 0, 1, 0, 0, 0],
[1, 0, 0, 0, 0, 0],
[1, 0, 0, 0, 0, 0],
[1, 0, 0, 0, 0, 0],
[1, 0, 0, 0, 0, 0],
[0, 1, 0, 0, 0, 0],
[1, 0, 0, 0, 0, 0],
[1, 0, 0, 0, 0, 0],
[0, 1, 0, 0, 0, 0],
[1, 0, 0, 0, 0, 0],
[1, 0, 0, 0, 0, 0],
[1, 0, 0, 0, 0, 0],
[0, 1, 0, 0, 0, 0],
[0, 0, 1, 0, 0, 0],
[0, 1, 0, 0, 0, 0],
[1, 0, 0, 0, 0, 0],
[1, 0, 0, 0, 0, 0],
[1, 0, 0, 0, 0, 0],
```







```

[221]: import numpy as np
        from scipy import interp
        import matplotlib.pyplot as plt
        from itertools import cycle
        from sklearn.metrics import roc_curve, auc

n_classes = 6
lw = 2
fpr = dict()
tpr = dict()
roc_auc = dict()
for i in range(n_classes):
    fpr[i], tpr[i], _ = roc_curve(y_test[:, i], y_score[:, i])
    #fpr[i], tpr[i], _ = roc_curve(y_test[:, i], y_score[:, i])
    roc_auc[i] = auc(fpr[i], tpr[i])

fpr["micro"], tpr["micro"], _ = roc_curve(y_test.ravel(), y_score.ravel())
roc_auc["micro"] = auc(fpr["micro"], tpr["micro"])

all_fpr = np.unique(np.concatenate([fpr[i] for i in range(n_classes)]))

mean_tpr = np.zeros_like(all_fpr)
for i in range(n_classes):
    mean_tpr += np.interp(all_fpr, fpr[i], tpr[i])

# Finally average it and compute AUC
mean_tpr /= n_classes

fpr["macro"] = all_fpr
tpr["macro"] = mean_tpr
roc_auc["macro"] = auc(fpr["macro"], tpr["macro"])

# Plot all ROC curves
plt.figure(1)
plt.grid(True)
plt.plot(fpr["micro"], tpr["micro"],
         label='micro-average ROC curve (area = {0:0.2f})'
         ''.format(roc_auc["micro"]),
         color='deeppink', linestyle=':', linewidth=4)

plt.plot(fpr["macro"], tpr["macro"],
         label='macro-average ROC curve (area = {0:0.2f})'
         ''.format(roc_auc["macro"]),
         color='navy', linestyle=':', linewidth=4)

colors = cycle(['aqua', 'darkorange', 'cornflowerblue', 'red', 'yellow', 'blue'])
for i, color in zip(range(n_classes), colors):

```

```

plt.plot(fpr[i], tpr[i], color=color, lw=lw,
         label='ROC curve of class {0} (area = {1:0.2f})'
         ''.format(i, roc_auc[i]))

plt.plot([0, 1], [0, 1], 'k--', lw=lw)
plt.xlim([0.0, 1.0])
plt.ylim([0.0, 1.05])
plt.xlabel('False Positive Rate')
plt.ylabel('True Positive Rate')
plt.title('Some extension of Receiver operating characteristic to multi-class')
plt.legend(loc="lower right")
plt.savefig('ROC_RF_1.tiff')
plt.show()

# Zoom in view of the upper left corner.
plt.figure(2)

plt.grid(True)

plt.xlim(0, 0.2)
plt.ylim(0.8, 1)
plt.plot(fpr["micro"], tpr["micro"],
         label='micro-average ROC curve (area = {0:0.2f})'
         ''.format(roc_auc["micro"]),
         color='deeppink', linestyle=':', linewidth=4)

plt.plot(fpr["macro"], tpr["macro"],
         label='macro-average ROC curve (area = {0:0.2f})'
         ''.format(roc_auc["macro"]),
         color='navy', linestyle=':', linewidth=4)

colors = cycle(['aqua', 'darkorange', 'cornflowerblue', 'red', 'yellow', 'blue'])
for i, color in zip(range(n_classes), colors):
    plt.plot(fpr[i], tpr[i], color=color, lw=lw,
             label='ROC curve of class {0} (area = {1:0.2f})'
             ''.format(i, roc_auc[i]))

plt.plot([0, 1], [0, 1], 'k--', lw=lw)
plt.xlabel('False Positive Rate')
plt.ylabel('True Positive Rate')
plt.title('Some extension of Receiver operating characteristic to multi-class')
plt.legend(loc="lower right")
plt.savefig('ROC_RF_2.pdf')
plt.show()

```

Some extension of Receiver operating characteristic to multi-class

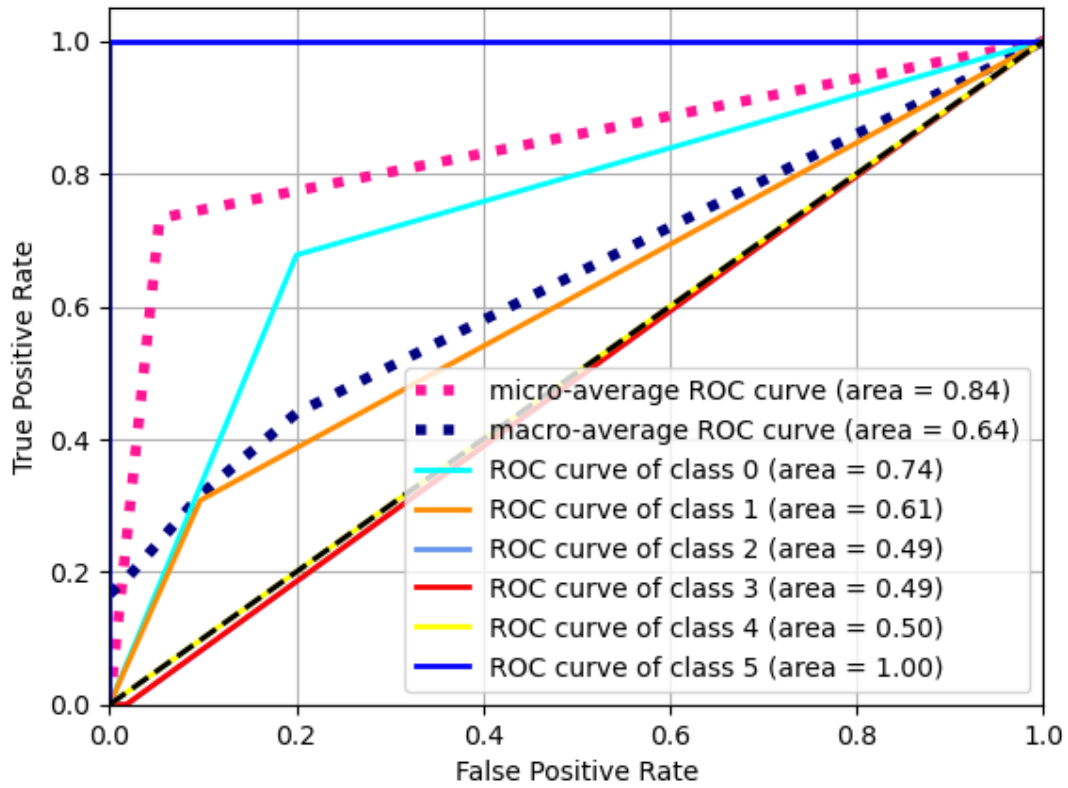

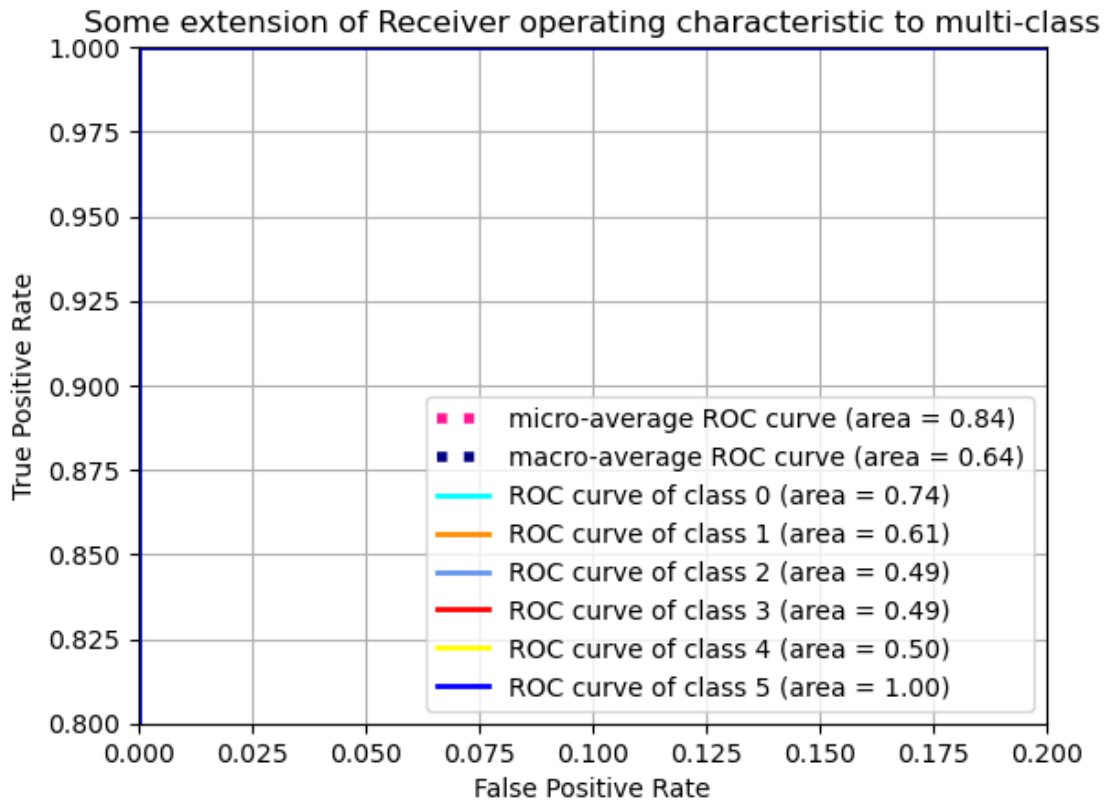

[ ]:
